# Supplementary material for: Impaired central sensitivity to thyroid hormone is associated with hypertriglyceridemia in euthyroid population
Source: Front Endocrinol (Lausanne). 2025 Jul 14;16:1616907. doi: 10.3389/fendo.2025.1616907 (PMC12301217; doi:10.3389/fendo.2025.1616907)
Supplement: Supplementary file 1 [file Table1.xlsx]

## Sheet: Sheet1
NAFLD	Gender	age	BMI	HBP	SBP	DBP	HB	PLT	GGT	ALB	HbA1c	ALT	AST	TBIL	IBIL	DBIL	Cr	eGFR	UA	FPG	TG	TC	Hyperlipidemia	HDL	LDL	TSH	FT3	FT4	FT3/FT4	TT4RI	TSHI	TFQI
0	0	29	20	0	120	78	121	272	14	48.6	5.50	9	37	11.9	9.9	2.0	73.0	100	276.0	5.35	0.36	4.66	0	1.79	2.93	0.927	3.67	12.25	0.299592	11.3558	1.57182	-0.552221
0	0	41	22.1	0	91	61	124	226	6	42.4	5.40	22	17	22.1	16.8	5.3	59.0	115	231.0	5.16	0.40	3.55	0	1.66	1.86	2.810	3.92	13.51	0.290155	37.9631	2.85028	0.511405
0	0	49	21.3	0	112	65	133	175	9	47.8	5.50	13	21	16.4	13.3	3.1	70.0	92	262.0	4.69	0.40	4.18	0	1.79	2.37	2.290	4.06	13.02	0.311828	29.8158	2.57974	0.255702
0	1	40	21.3	0	106	70	143	226	20	47.9	5.20	18	22	25.2	19.9	5.3	72.0	117	210.0	4.58	0.41	3.87	0	1.81	2.02	0.994	4.97	10.35	0.480193	10.2879	1.38606	-0.817527
0	0	21	19.7	0	105	61	125	312	13	48.3	5.40	13	19	10.9	9.5	1.4	54.0	136	247.0	4.72	0.42	4.51	0	1.84	2.57	1.760	4.27	11.62	0.36747	20.4512	2.1282	-0.266507
0	0	34	19.8	0	90	56	90	269	6	45.7	5.30	10	16	14.5	11.7	2.8	47.0	130	210.0	4.89	0.44	3.66	0	1.33	2.42	1.357	4.24	11.34	0.373898	15.3884	1.83051	-0.512605
0	0	30	21.4	0	111	76	143.2	272	12	46.9	5.30	14	19	52.2	44.0	8.2	63.0	122	256.0	4.55	0.46	5.11	0	2.02	3.03	0.895	4.15	14.74	0.281547	13.1923	1.8716	-0.00840336
0	0	36	19.2	0	108	73	127	204	16	49.3	5.40	9	16	17.7	14.1	3.6	50.0	125	204.0	5.63	0.47	4.41	0	2.40	2.25	1.359	4.76	13.25	0.359245	18.0068	2.08887	-0.0540216
0	0	51	27.2	0	113	71	135	172	8	48.6	5.40	15	19	29.5	23.9	5.6	65.0	99	300.0	4.67	0.47	4.79	0	1.94	2.49	1.664	3.71	13.78	0.269231	22.9299	2.36263	0.210084
0	0	51	25.1	0	99	51	127	203	19	44.3	5.80	9	22	23.6	19.7	3.9	57.0	108	263.0	4.87	0.47	5.13	0	2.16	2.96	2.035	3.86	11.11	0.347435	22.6089	2.20479	-0.236495
0	0	29	21.6	0	102	60	119	228	7	45.5	5.30	9	15	14	11.1	2.9	53.0	129	187.0	5.02	0.48	3.46	0	1.54	1.83	1.260	3.80	10.99	0.345769	13.8474	1.70927	-0.626651
0	0	30	23.5	0	102	62	135	336	19	46.9	5.40	10	16	12.1	9.8	2.3	47.0	134	247.0	5.40	0.48	4.41	0	1.59	2.85	2.173	4.77	13.40	0.35597	29.1182	2.57841	0.338535
0	1	50	21.7	0	121	75	140	188	18	47.4	5.90	13	20	15	12.3	2.7	72.0	109	245.0	5.83	0.48	4.49	0	1.90	2.64	1.007	3.73	10.65	0.350235	10.7246	1.4394	-0.787515
0	1	75	21	0	119	66	139	186	25	49.2	6.10	47	24	19.1	14.3	4.8	75.0	90	477.0	6.48	0.48	4.89	0	2.13	2.60	1.351	4.75	14.61	0.32512	19.7381	2.26589	0.219688
0	0	37	19.5	0	108	64	137	180	24	46.4	5.40	11	19	15	11.0	4.0	54.0	122	174.0	5.33	0.49	3.60	0	2.16	1.18	1.055	4.81	13.81	0.348298	14.5695	1.91099	-0.0960384
0	0	27	20.3	0	85	55	130	186	13	46.4	5.10	11	18	12.4	9.6	2.8	67.0	113	269.0	4.34	0.50	4.12	0	1.76	2.37	2.748	4.23	14.78	0.286198	40.6154	2.99878	0.741897
0	1	51	22.3	0	96	64	140	188	20	44.7	5.20	9	21	18	15.7	2.3	103.0	76	476.0	4.75	0.50	5.36	0	1.14	4.30	0.954	4.10	16.78	0.244338	16.0081	2.20982	0.138055
0	0	49	23.6	0	104	63	134	128	12	46	5.40	12	22	24.8	19.6	5.2	71.0	91	260.0	5.07	0.51	3.75	0	1.49	2.14	2.002	4.49	13.74	0.326783	27.5075	2.54218	0.366146
0	1	22	23.9	0	113	60	148	249	14	47.5	5.80	14	17	15.1	12.0	3.1	86.0	116	427.0	4.87	0.52	3.44	0	1.04	2.30	1.281	4.21	13.03	0.323101	16.6914	2.00018	-0.164466
0	0	34	18.9	0	102	54	117	169	16	42.6	5.40	13	16	10.4	8.4	2.0	63.0	117	254.0	4.96	0.52	3.57	0	1.27	2.19	1.001	4.46	12.47	0.357658	12.4825	1.67821	-0.458583
0	0	58	27.2	0	110	64	127	200	15	42.7	5.60	15	22	18.5	15.3	3.2	44.0	112	249.0	5.01	0.52	3.88	0	1.39	2.53	1.175	4.31	11.47	0.375763	13.4772	1.70398	-0.595438
0	0	32	20	0	100	60	121	189	8	47.8	5.40	8	17	29.5	24.7	4.8	53.0	126	333.0	4.57	0.52	4.42	0	1.54	2.76	1.086	3.65	11.41	0.319895	12.3913	1.61715	-0.651861
0	1	54	21	0	108	71	139	197	20	47.6	5.50	15	32	14.5	10.9	3.6	66.0	110	271.0	5.30	0.53	3.46	0	1.29	1.99	0.923	4.85	11.81	0.410669	10.9006	1.50832	-0.647059
0	1	73	21.1	1	175	77	141	225	25	44.8	8.90	13	19	17.9	14.0	3.9	57.0	103	209.0	7.22	0.55	3.26	0	1.59	1.52	0.922	3.76	16.06	0.234122	14.8073	2.07886	0.103241
0	0	40	19.2	0	103	73	123	172	7	46.3	4.80	8	15	30	23.8	6.2	61.0	115	260.0	4.71	0.55	3.43	0	1.27	2.05	2.912	4.02	13.88	0.289625	40.4186	2.9357	0.618247
0	0	23	20.4	0	110	88	130	307	8	47.7	5.20	40	17	19.6	15.7	3.9	51.0	137	228.0	4.73	0.55	4.12	0	1.54	2.44	2.408	5.10	16.38	0.311355	39.443	3.08191	0.753902
0	1	55	22.9	0	106	61	158	174	57	46.3	6.20	23	27	17.4	13.6	3.8	94.0	83	358.0	5.28	0.55	4.49	0	1.72	2.64	1.229	4.57	13.29	0.343868	16.3334	1.99371	-0.127251
1	0	47	29.4	1	148	66	121	230	9	46.7	5.50	32	33	17.8	14.7	3.1	46.0	120	269.0	4.79	0.55	5.27	0	1.44	3.76	1.870	3.72	11.34	0.328042	21.2058	2.15117	-0.268908
0	0	24	20.7	0	124	82	136	157	12	49.6	5.00	14	18	34.6	27.7	6.9	71.0	108	295.0	4.44	0.57	3.49	0	1.63	1.73	2.185	4.35	13.67	0.318215	29.869	2.62023	0.405762
0	0	40	20.1	0	96	67	139	133	5	46.9	5.40	8	14	11.3	9.2	2.1	60.0	115	301.0	4.60	0.57	4.69	0	1.78	2.66	2.439	3.63	13.14	0.276256	32.0485	2.65892	0.332533
1	0	48	23.6	0	105	55	126	315	16	45.8	5.60	7	19	13.4	11.0	2.4	56.0	111	312.0	5.13	0.57	5.60	0	1.76	3.77	3.895	4.05	13.17	0.307517	51.2972	3.13106	0.523409
0	1	36	22.1	0	110	68	160	228	8	47.2	5.30	15	19	12	9.2	2.8	96.0	92	374.0	4.80	0.58	3.27	0	1.62	1.42	1.385	4.96	15.14	0.327609	20.9689	2.36203	0.307323
0	0	29	20.5	0	113	72	146	305	14	50.9	5.10	17	15	22.3	18.2	4.1	56.0	127	195.0	4.98	0.58	3.30	0	1.38	1.92	1.691	4.63	13.11	0.353166	22.169	2.28862	0.0564226
0	0	47	22.1	0	105	57	128	172	11	46.8	5.40	15	23	31.2	26.6	4.6	60.0	110	289.0	5.40	0.58	4.47	0	1.62	2.85	1.281	4.33	12.35	0.350607	15.8203	1.90872	-0.334934
0	0	38	25.2	0	122	74	141	218	11	45.5	5.40	12	24	14	11.6	2.4	62.0	115	229.0	5.24	0.58	4.57	0	1.78	2.74	1.418	3.70	11.75	0.314894	16.6615	1.92962	-0.406963
0	0	51	23.3	0	133	89	137	180	9	49.5	5.50	13	23	19.1	15.5	3.6	68.0	94	257.0	5.25	0.59	4.07	0	1.11	2.78	3.329	5.72	15.77	0.362714	52.4983	3.32374	0.896759
0	0	33	23.2	0	100	74	140	221	13	50.3	5.20	9	15	38.3	31.6	6.7	46.0	131	260.0	4.92	0.59	4.11	0	1.63	2.19	1.745	3.82	12.29	0.310822	21.446	2.20976	-0.12605
0	0	33	23.2	0	95	70	139	207	11	50.3	5.70	7	15	17.1	14.7	2.4	66.0	111	350.0	4.57	0.59	5.51	0	1.60	3.68	1.705	3.68	11.30	0.325664	19.2665	2.05342	-0.352941
0	1	24	20.8	0	132	58	156	217	15	48.6	5.60	16	20	25.1	19.1	6.0	107.0	89	313.0	4.86	0.60	4.17	0	1.50	2.54	1.809	4.52	15.04	0.300532	27.2074	2.61565	0.496999
0	1	55	25.4	0	129	84	130	228	14	43.3	5.40	12	16	11.9	8.9	3.0	72.0	106	335.0	5.30	0.60	4.18	0	1.28	2.77	1.146	4.18	13.48	0.310089	15.4481	1.94934	-0.117647
0	0	36	24.3	0	107	66	123	279	9	45.5	5.50	7	18	24.8	21.0	3.8	74.0	95	288.0	4.71	0.60	4.62	0	1.72	2.87	2.782	3.55	11.01	0.322434	30.6298	2.50402	-0.0660264
0	0	59	21.7	0	99	60	128	154	16	48.9	5.50	15	23	29.1	24.0	5.1	50.0	107	308.0	4.91	0.60	4.62	0	1.65	2.83	0.866	4.76	12.30	0.386992	10.6518	1.51048	-0.578631
0	0	39	19.4	0	101	66	130.5	210.8	14	47.3	5.80	16	25	21.5	18.4	3.1	54.0	120	418.0	4.79	0.60	5.48	0	2.26	3.20	1.299	3.81	14.21	0.268121	18.4588	2.17284	0.128451
0	0	36	21.1	0	89	56	115	249	9	44.3	5.40	10	16	16.4	13.2	3.2	62.0	117	282.0	5.17	0.61	3.72	0	1.46	2.15	0.657	3.99	12.71	0.313926	8.35047	1.28942	-0.536615
0	0	46	21.2	0	128	77	120	164	7	42.8	5.50	14	17	21.3	16.5	4.8	47.0	120	236.0	5.70	0.61	3.90	0	1.67	2.14	2.148	4.41	13.31	0.33133	28.5899	2.55473	0.306122
0	0	41	22.2	0	108	71	115	345	20	47.2	5.60	16	20	12	10.4	1.6	50.0	121	296.0	5.69	0.61	5.87	0	2.51	3.30	1.869	4.41	14.75	0.298983	27.5678	2.60928	0.483794
0	0	45	19.7	0	104	62	117.4	124.5	8	46.3	5.50	15	23	25.6	22.7	2.9	54.0	114	242.0	5.04	0.61	6.02	0	2.23	3.85	2.315	4.83	14.04	0.344017	32.5026	2.72779	0.52461
0	0	37	22.1	0	100	58	135	281	14	46.8	5.30	11	18	17.9	14.9	3.0	60.0	118	235.0	4.32	0.62	4.09	0	1.38	2.46	3.370	3.43	11.64	0.294674	39.2268	2.78049	0.116447
0	1	22	23.8	0	99	50	145	216	16	50.3	5.20	19	20	14.8	11.9	2.9	92.0	107	314.0	4.40	0.62	4.24	0	1.41	2.52	2.258	3.93	11.79	0.333333	26.6218	2.40023	-0.0468187
0	0	27	23.7	0	112	67	132	230	18	46.5	5.40	17	22	19.3	16.4	2.9	58.0	128	265.0	4.61	0.62	4.65	0	1.39	3.24	1.378	4.28	13.67	0.313094	18.8373	2.15925	0.057623
0	0	65	29.4	0	128	68	136.5	176.2	27	42.5	5.60	41	44	20.5	16.5	4.0	52.0	101	331.0	4.40	0.62	5.21	0	1.70	3.31	3.381	4.30	12.30	0.349593	41.5863	2.87252	0.261705
0	0	35	23.2	0	104	62	131	122	11	50.6	5.40	22	19	26.2	22.1	4.1	61.0	119	212.0	4.78	0.63	4.22	0	1.66	2.46	0.852	3.90	11.99	0.325271	10.2155	1.45249	-0.655462
0	0	53	25.8	0	118	68	130	191	16	45.8	5.40	44	24	10.8	8.9	1.9	65.0	98	284.0	4.42	0.63	4.41	0	1.58	2.80	1.140	4.20	13.91	0.301941	15.8574	2.00192	-0.0132053
0	1	49	24.4	0	110	72	149	245	14	46.9	5.50	23	21	29	23.6	5.4	72.0	110	292.0	5.29	0.63	5.47	0	1.44	4.05	1.923	4.94	10.98	0.449909	21.1145	2.1307	-0.295318
0	0	40	19.1	0	111	66	129	234	16	49.1	5.20	11	22	14.6	11.9	2.7	68.0	102	246.0	4.62	0.64	3.74	0	1.66	2.19	1.116	3.82	11.11	0.343834	12.3988	1.60405	-0.691477
0	1	46	26	0	126	79	157	203	27	50	5.40	31	23	20.2	15.4	4.8	103.0	79	508.0	4.67	0.64	3.95	0	1.47	2.35	1.947	4.71	12.24	0.384804	23.8313	2.31257	-0.0444178
0	0	26	20.2	0	114	77	137	294	13	49.1	5.10	12	19	21	17.2	3.8	53.0	132	300.0	4.98	0.65	3.69	0	1.38	2.11	2.729	4.01	16.74	0.239546	45.6835	3.25547	0.839136
0	1	68	23.8	0	138	83	124.9	245.1	20	41.8	5.60	27	25	22.5	18.5	4.0	82.0	89	329.0	5.13	0.65	4.41	0	1.69	2.55	2.636	4.75	12.57	0.377884	33.1345	2.65993	0.232893
0	1	50	23.5	1	147	92	143	181	24	46.6	9.80	16	17	14.1	10.9	3.2	69.0	111	225.0	14.34	0.65	4.42	0	1.14	3.12	1.915	4.61	14.54	0.317056	27.8441	2.60535	0.482593
0	0	43	24.3	0	102	60	127	185	16	46.1	5.20	12	20	14.8	13.0	1.8	70.0	96	295.0	4.80	0.65	4.97	0	1.80	3.13	1.614	4.28	12.15	0.352263	19.6101	2.11289	-0.22569
0	0	28	20	0	120	77	128	266	9	46.4	5.50	10	18	16.5	13.2	3.3	56.0	128	286.0	4.16	0.66	3.37	0	1.58	1.68	2.851	4.74	10.86	0.436464	30.9619	2.50834	-0.0744298
0	1	25	29.4	0	125	74	165	235	44	45.9	5.60	40	23	27.8	22.7	5.1	86.0	114	502.0	4.97	0.66	4.61	0	1.06	3.54	1.085	5.25	11.80	0.444915	12.803	1.66868	-0.570228
0	0	32	25	0	119	52	117	227	12	47.3	5.50	15	19	16.1	13.3	2.8	60.0	122	287.0	4.59	0.66	4.77	0	1.48	3.15	1.132	5.08	12.93	0.392885	14.6368	1.86307	-0.278511
0	1	54	21.3	0	116	64	142	137	18	48.6	6.10	18	21	16.7	13.6	3.1	97.0	80	264.0	5.75	0.66	5.13	0	2.43	2.70	0.554	3.95	10.62	0.37194	5.88348	0.837799	-0.954382
0	0	37	22.6	0	107	55	132	166	9	44.5	5.30	7	13	13.6	10.5	3.1	56.0	120	293.0	4.68	0.67	3.32	0	1.17	2.05	2.628	3.47	12.84	0.270249	33.7435	2.6932	0.294118
0	0	43	24.5	0	101	66	126	376	8	47.9	5.40	14	16	14.2	11.8	2.4	51.0	119	260.0	4.49	0.67	4.11	0	1.42	2.57	2.237	4.35	12.30	0.353659	27.5151	2.45949	0.0564226
0	1	57	24.1	0	104	62	144	152	22	45.5	5.40	13	19	22.7	17.6	5.1	72.0	104	333.0	5.11	0.67	4.32	0	2.18	1.97	1.847	4.58	13.51	0.339008	24.953	2.43066	0.242497
0	0	54	23.7	1	175	75	124	204	16	44.4	5.70	11	18	17.8	15.0	2.8	61.0	104	213.0	5.24	0.67	4.47	0	1.64	2.85	3.182	4.15	13.88	0.298991	44.1662	3.02437	0.656663
0	1	39	20.8	0	109	71	161	224	14	50.5	5.40	12	22	38.2	32.2	6.0	76.0	115	339.0	4.70	0.67	4.53	0	1.61	2.96	2.162	4.76	12.86	0.37014	27.8033	2.5007	0.184874
0	1	37	24.2	0	127	76	148	191	16	50.5	5.50	13	18	30.2	25.4	4.8	105.0	82	461.0	5.32	0.67	4.87	0	1.58	3.13	1.169	4.39	10.90	0.402752	12.7421	1.6222	-0.684274
0	1	30	20.5	0	102	70	158	189	6	47.8	5.50	13	19	29.5	23.8	5.7	85.0	111	340.0	4.97	0.68	3.37	0	1.43	1.70	2.849	4.50	14.96	0.300802	42.621	3.05909	0.781513
0	0	52	26	1	153	85	137.9	191.1	15	43.8	6.30	14	18	13	10.3	2.7	50.0	112	235.0	5.93	0.68	4.52	0	1.36	3.00	1.645	4.30	11.79	0.364716	19.3945	2.0835	-0.289316
0	0	35	19.3	0	103	63	131	393	8	48.9	5.40	7	12	18.9	15.7	3.2	47.0	129	220.0	4.62	0.68	4.85	0	1.38	3.37	0.872	4.14	12.44	0.332797	10.8477	1.53621	-0.534214
0	1	51	23.9	1	103	70	148	263	26	48	5.20	8	19	22.3	18.2	4.1	95.0	85	336.0	4.96	0.70	4.34	0	1.14	3.16	2.584	4.38	11.88	0.368687	30.6979	2.5472	0.057623
0	0	33	20.5	0	123	88	144.2	186	16	46.4	5.40	13	16	15.6	12.9	2.7	53.0	126	262.0	4.77	0.70	4.62	0	1.95	2.62	2.001	4.67	16.60	0.281325	33.2166	2.92635	0.648259
0	0	51	22.9	0	110	68	111	265	9	47.2	5.10	11	19	19.2	15.8	3.4	58.0	108	192.0	4.59	0.70	5.10	0	2.31	2.73	0.850	4.15	11.02	0.376588	9.367	1.31967	-0.831933
0	0	29	19.6	0	114	69	122	334	6	49.3	5.70	10	17	11.2	9.9	1.3	56.0	126	346.0	5.17	0.70	6.96	0	1.84	4.85	1.148	4.49	12.76	0.351881	14.6485	1.85424	-0.309724
0	0	50	29.6	0	103	64	100	241	15	41.4	5.90	16	17	12.1	9.8	2.3	45.0	118	241.0	5.17	0.71	4.51	0	1.53	2.89	2.854	4.07	10.84	0.375461	30.9374	2.5067	-0.0768307
0	0	24	24.6	0	109	75	137	158	11	48.7	5.30	11	16	19.4	15.4	4.0	71.0	108	312.0	5.24	0.72	3.33	0	1.39	1.85	1.915	4.37	14.23	0.307098	27.2505	2.56365	0.436975
1	1	44	27.1	1	114	82	158	247	26	48.7	5.50	23	16	13.3	9.9	3.4	81.0	107	283.0	5.41	0.72	3.37	0	1.23	1.99	1.485	5.24	12.85	0.407782	19.0822	2.12374	-0.116447
0	1	37	21.8	0	108	71	162	208	15	47.2	5.60	8	17	10.3	8.5	1.8	75.0	118	349.0	5.02	0.72	3.97	0	1.12	2.60	2.223	4.81	11.87	0.405223	26.387	2.39537	-0.0372149
0	0	49	23	1	144	90	99	322	12	45.2	5.60	13	18	18.8	16.5	2.3	56.0	110	161.0	5.09	0.72	4.38	0	1.51	2.67	2.916	3.89	12.59	0.308975	36.7124	2.76357	0.285714
0	1	61	23.7	0	135	83	150	209	78	46.9	5.80	23	23	26.7	20.7	6.0	82.0	94	328.0	5.01	0.72	4.43	0	1.78	2.52	1.099	4.22	12.33	0.342255	13.5507	1.75279	-0.444178
0	1	48	25.7	1	146	91	167	197	64	50.7	5.80	22	33	26.8	21.8	5.0	76.0	108	435.0	6.08	0.72	4.49	0	1.40	2.91	0.496	5.36	15.02	0.356858	7.44992	1.31901	-0.0732293
0	1	35	22.6	0	122	75	146	203	12	49	5.40	14	21	30.5	25.0	5.5	82.0	112	350.0	4.78	0.72	4.65	0	1.50	2.92	2.454	4.61	13.15	0.35057	32.2701	2.66639	0.343337
0	0	56	21.3	0	120	76	130	256	16	46.7	5.70	14	24	15	12.8	2.2	64.0	98	244.0	4.63	0.72	5.11	0	1.65	3.42	0.903	4.48	11.64	0.38488	10.5109	1.46355	-0.697479
0	1	61	23.6	0	116	76	151	242	23	47.9	6.00	15	24	21.2	18.2	3.0	91.0	82	303.0	6.23	0.72	5.78	0	1.79	3.80	1.503	4.97	15.86	0.313367	23.8376	2.54063	0.39976
1	1	52	26.1	1	142	87	151	215	20	43.5	6.60	10	25	14	11.7	2.3	76.0	106	278.0	6.28	0.72	6.15	0	1.66	4.47	1.385	4.50	11.87	0.379107	16.4399	1.92222	-0.393758
0	1	79	24	1	117	64	138	86	15	49.3	6.00	18	25	40.6	30.8	9.8	132.0	47	399.0	4.69	0.73	2.22	0	0.87	1.00	2.215	4.05	14.58	0.277778	32.2947	2.75626	0.579832
0	0	42	19.3	0	98	64	130	150	29	47.2	5.80	16	22	14.9	12.3	2.6	51.0	120	314.0	5.84	0.73	3.70	0	1.77	1.83	1.446	4.36	11.62	0.375215	16.8025	1.93169	-0.427371
0	0	24	21.9	0	112	72	128	140	12	47.3	5.40	8	18	12.2	9.9	2.3	66.0	117	317.0	4.59	0.73	3.71	0	1.39	2.07	2.599	3.40	11.01	0.30881	28.615	2.43597	-0.0996399
0	0	49	21.3	0	135	82	114	418	13	43.3	6.00	10	17	13.5	10.9	2.6	51.0	114	366.0	5.20	0.73	3.80	0	1.34	2.35	1.539	3.71	12.23	0.303352	18.822	2.07607	-0.237695
0	1	48	21.5	0	106	55	165	187	18	47.6	5.50	22	21	24.8	20.2	4.6	75.0	109	248.0	4.68	0.73	3.92	0	1.16	2.52	1.533	4.30	12.47	0.344828	19.1165	2.10444	-0.17527
0	0	33	19	0	97	64	139	170	15	49.2	6.50	7	19	23.7	20.1	3.6	54.0	125	278.0	6.89	0.73	4.77	0	2.18	2.50	1.708	4.62	13.04	0.354294	22.2723	2.2892	0.0552221
0	0	26	21.8	0	109	66	113	178	13	47.3	5.00	14	18	12.9	9.9	3.0	54.0	132	211.0	4.61	0.74	4.01	0	1.85	2.25	1.134	5.30	14.31	0.37037	16.2275	2.05045	0.0564226
0	1	25	24.4	0	96	60	153.1	204.7	13	50.5	5.30	13	15	14.5	11.9	2.6	72.0	130	259.0	4.94	0.74	4.02	0	1.29	2.53	0.901	4.55	15.75	0.288889	14.1907	2.01412	0.0840336
0	0	59	23.8	0	111	68	113	254	46	48.3	5.60	22	22	19.6	16.2	3.4	52.0	106	116.0	5.61	0.74	5.49	0	2.08	3.41	1.801	4.15	10.91	0.380385	19.6489	2.05574	-0.366146
0	0	55	21.1	0	118	71	127	125	17	46	6.10	11	26	26.7	22.5	4.2	61.0	103	276.0	4.73	0.74	6.01	0	2.22	3.59	2.815	4.27	12.01	0.355537	33.8081	2.65031	0.12485
0	1	53	24.1	1	157	91	135	163	18	47.5	5.70	14	28	39.3	31.3	8.0	70.0	108	338.0	4.96	0.75	3.85	0	1.93	2.00	1.601	4.85	10.62	0.456685	17.0026	1.89902	-0.486194
0	0	38	19.5	0	97	78	154	182	16	52.5	5.30	8	18	12.9	10.5	2.4	67.0	104	226.0	4.86	0.75	4.22	0	1.54	2.48	2.534	4.12	13.49	0.305411	34.1837	2.7442	0.458583
0	0	33	22.6	0	118	76	124	201	14	52.5	5.10	10	15	36.4	30.8	5.6	63.0	119	331.0	4.70	0.75	4.26	0	1.70	2.57	0.646	4.12	13.04	0.315951	8.42384	1.31692	-0.45018
0	1	58	21	0	124	86	142	262	11	50.60	5.70	9	22	18	14.6	3.4	72.0	103	286.0	4.76	0.75	4.32	0	1.59	2.61	1.556	4.71	14.11	0.333806	21.9552	2.33991	0.252101
0	0	51	18.7	0	98	58	136	228	11	48.4	5.60	17	29	31	25.8	5.2	62.0	105	186.0	4.97	0.75	4.54	0	2.04	2.41	1.236	4.01	11.41	0.351446	14.1028	1.74653	-0.57623
0	1	46	25	1	131	97	161	190	36	49.1	5.00	9	23	40.4	31.2	9.2	90.0	94	344.0	5.25	0.75	4.54	0	1.70	2.65	1.733	4.43	16.69	0.265428	28.9238	2.79466	0.535414
0	0	40	19.2	0	121	82	132	209	12	47.3	5.40	16	22	23.3	19.6	3.7	59.0	115	208.0	5.21	0.75	5.13	0	2.96	2.15	1.394	3.53	12.98	0.271957	18.0941	2.07799	-0.118848
0	0	57	21.3	0	116	64	122	119	11	45.8	5.40	27	27	21.7	17.8	3.9	54.0	106	190.0	4.53	0.75	5.26	0	2.19	2.92	1.083	4.40	10.18	0.43222	11.0249	1.44894	-0.77551
0	1	41	22.2	0	137	86	147	226	18	48.7	5.60	15	22	26.2	21.1	5.1	76.0	113	255.0	5.63	0.75	5.36	0	1.95	3.35	3.671	4.49	12.31	0.364744	45.19	2.95616	0.285714
0	1	41	23.5	0	130	83	141.1	224.7	24	51.3	5.40	21	20	16.9	13.3	3.6	94.0	92	372.0	4.97	0.76	3.30	0	1.34	1.89	1.697	5.53	12.35	0.447773	20.958	2.18994	-0.12485
0	0	50	22.1	0	123	71	106	283	9	45.8	5.50	11	22	10.9	9.4	1.5	44.0	118	200.0	4.93	0.76	4.14	0	1.39	2.76	2.460	3.81	13.24	0.287764	32.5704	2.68094	0.37455
0	1	60	23.8	0	136	76	149	146	20	40.8	5.90	17	18	7.1	5.8	1.3	69.0	104	237.0	5.35	0.76	5.33	0	1.47	3.74	1.270	4.64	12.72	0.36478	16.1544	1.94986	-0.256903
0	1	67	20.3	0	122	75	138	191	13	43	5.60	11	22	24.1	20.6	3.5	64.0	102	319.0	4.78	0.76	5.82	0	1.46	4.24	0.742	4.08	12.43	0.328238	9.22306	1.37343	-0.590636
0	0	30	23	0	121	68	144	242	14	47.3	5.30	26	30	12.7	11.1	1.6	50.0	130	181.0	4.67	0.77	4.14	0	1.75	2.51	1.339	4.19	12.20	0.343443	16.3358	1.93282	-0.348139
0	0	41	20.3	0	117	69	102	236	11	43.9	5.40	10	21	18	15.3	2.7	70.0	97	241.0	4.88	0.77	4.56	0	1.71	2.89	1.794	3.88	11.50	0.337391	20.631	2.1312	-0.280912
0	0	36	22.4	0	107	63	131	247	38.72	47.13	5.40	10	18	19.22	15.95	3.314	55.0	122	233.0	5.00	0.78	3.87	0	1.80	1.93	1.487	4.49	11.75	0.382128	17.4722	1.97714	-0.379352
0	1	48	22.1	1	143	88	154	222	25	52.4	5.50	29	22	21.2	16.4	4.8	81.0	104	342.0	5.25	0.78	4.79	0	2.81	1.98	1.828	4.77	12.28	0.388436	22.4478	2.25488	-0.0936375
0	0	50	19.9	0	90	51	132	202	6	46.1	5.40	171	20	21.7	18.6	3.1	56.0	109	234.0	4.99	0.78	5.09	0	1.80	3.11	2.433	3.75	13.73	0.273125	33.4051	2.73581	0.478992
0	1	46	21.7	1	114	66	139	177	15	44.6	5.60	22	23	11.2	9.2	2.0	95.0	87	398.0	5.00	0.78	5.17	0	1.67	3.33	2.027	4.49	13.58	0.330633	27.5267	2.53307	0.346939
0	0	34	22.9	0	108	71	124	192	13	49	5.6	14	19	20.3	16.7	3.6	56.0	123	228.0	5.19	0.78	5.25	0	2.06	3.21	2.133	4.22	10.90	0.387156	23.2497	2.22358	-0.236495
0	1	66	27.1	0	136	80	132	172	22	46	6.00	24	34	8.1	5.9	2.2	82.0	91	276.0	5.30	0.79	3.38	0	1.21	1.86	4.848	4.97	13.87	0.358327	67.2418	3.44408	0.734694
1	0	46	23.4	1	140	79	123	242	12	46.6	5.50	15	18	41	33.4	7.6	62.0	109	280.0	4.10	0.79	4.35	0	1.46	2.88	0.568	4.78	11.82	0.404399	6.71376	1.02416	-0.758703
1	1	42	28.6	0	131	85	153	211	27	46.4	5.60	15	19	17.6	14.3	3.3	92.0	94	348.0	5.25	0.79	4.41	0	1.36	2.85	0.704	4.25	12.41	0.342466	8.73664	1.31817	-0.601441
0	1	52	24.3	0	128	68	148	180	12	43.7	5.10	10	19	27.7	23.2	4.5	85.0	96	303.0	5.24	0.79	5.60	0	2.27	3.26	0.756	3.95	11.82	0.334179	8.93592	1.31008	-0.719088
0	0	56	26.2	1	146	74	132	143	12	46.3	5.40	22	32	17.7	14.7	3.0	57.0	105	196.0	4.73	0.79	6.15	0	1.76	4.21	1.922	3.45	12.86	0.268274	24.7169	2.38304	0.108043
0	0	37	19.7	0	103	64	109	277	13	44.4	5.40	18	21	15.8	12.5	3.3	63.0	116	243.0	4.64	0.80	3.85	0	1.56	1.99	1.307	4.35	11.81	0.368332	15.4357	1.85618	-0.440576
0	1	71	19.8	0	105	52	149	163	19	43.6	5.40	20	27	23	17.9	5.1	78.0	91	389.0	4.34	0.81	3.50	0	1.68	1.59	1.826	3.61	13.84	0.260838	25.2718	2.46361	0.314526
0	0	41	19.3	0	99	62	112	235	11	44.2	5.40	12	22	14.1	11.4	2.7	54.0	118	282.0	4.92	0.81	3.68	0	1.30	2.16	0.753	4.10	12.94	0.316847	9.74382	1.45674	-0.456182
0	1	68	22.9	0	115	68	117	162	17	42.3	5.70	10	18	10.3	8.0	2.3	67.0	99	392.0	5.08	0.81	3.85	0	1.03	2.48	1.133	3.57	11.71	0.304868	13.2674	1.69986	-0.565426
0	1	77	20.1	0	134	78	123	211	14	46.6	5.70	16	27	16.8	13.7	3.1	84.0	81	355.0	5.14	0.81	3.89	0	1.42	2.46	1.898	4.43	12.27	0.361043	23.2885	2.29112	-0.0660264
0	0	38	19.8	0	96	74	135	197	11	49.2	5.20	13	23	20.3	16.6	3.7	66.0	107	185.0	4.69	0.81	4.25	0	1.90	2.30	1.243	4.37	14.09	0.310149	17.5139	2.11263	0.0684274
0	1	68	25.3	1	127	82	154	205	35	45.7	6.40	31	32	28.5	23.3	5.2	92.0	78	432.0	6.01	0.81	4.28	0	1.85	2.52	1.492	4.10	15.21	0.26956	22.6933	2.44586	0.357743
0	1	68	23.9	1	121	72	114	222	13	44	5.80	10	18	14.7	11.9	2.8	87.0	83	329.0	4.98	0.81	4.72	0	1.45	3.12	1.553	4.44	14.23	0.312017	22.0992	2.35412	0.268908
0	0	61	19.4	0	107	69	113	156	21	47.3	5.40	17	28	26	21.7	4.3	66.0	91	268.0	4.83	0.81	5.67	0	2.22	3.57	3.227	4.68	11.32	0.413428	36.5296	2.69409	0.0384154
0	0	50	21.9	0	102	60	121	218	13	44.4	5.70	17	25	22.4	18.5	3.9	56.0	109	292.0	5.01	0.82	3.97	0	1.66	2.14	1.472	4.83	13.21	0.365632	19.4451	2.16337	-0.0204082
0	0	52	19.1	0	116	78	135	251	13	46	5.80	13	20	21.9	18.5	3.4	54.0	110	216.0	6.77	0.82	4.23	0	1.30	2.80	0.899	4.47	11.23	0.398041	10.0958	1.40396	-0.782713
0	1	59	20.6	0	111	72	134	262	22	45	5.90	8	15	10.5	8.1	2.4	84.0	93	292.0	4.81	0.82	4.27	0	1.44	2.95	1.969	4.65	14.54	0.319807	28.6293	2.63316	0.509004
0	0	30	22.1	0	122	74	129	207	13	45.9	5.30	18	19	11	9.1	1.9	59.0	124	350.0	5.14	0.82	5.00	0	1.32	3.69	0.845	3.42	11.63	0.294067	9.82735	1.39582	-0.733493
0	1	56	21.7	0	122	75	142.3	198.3	23	47	5.90	21	26	37.9	29.6	8.3	66.0	108	313.0	5.68	0.82	5.14	0	2.52	2.43	1.075	3.97	13.82	0.287265	14.8565	1.93111	-0.0756303
0	0	33	20.7	0	100	61	128	233	27	50.3	5.70	16	21	14.2	12.3	1.9	71.0	101	393.0	4.77	0.82	5.23	0	1.29	3.68	1.561	3.21	11.50	0.27913	17.9515	1.99208	-0.380552
0	0	49	18.3	0	126	71	96	212	8	44.9	5.90	8	15	14.2	12.9	1.3	56.0	111	107.0	5.29	0.82	5.63	0	2.18	3.54	2.995	3.82	10.72	0.356343	32.1064	2.53878	-0.0636255
0	0	56	23.5	0	116	61	130	228	15	47.3	5.40	11	21	18.9	16.4	2.5	53.0	107	347.0	4.93	0.82	6.05	0	1.94	3.89	1.359	4.67	13.46	0.346954	18.2921	2.11712	0
1	1	34	24.4	0	113	80	158	167	100	49.5	5.30	30	35	7.4	5.4	2.0	73.0	122	503.0	4.71	0.83	3.69	0	1.08	2.19	1.262	5.53	12.42	0.44525	15.674	1.90319	-0.337335
1	0	60	27.2	0	121	82	127	290	23	42.8	5.40	16	22	14.6	12.1	2.5	54.0	104	176.0	5.30	0.83	4.66	0	1.40	3.26	4.163	4.36	14.16	0.30791	58.9481	3.33076	0.771909
1	0	61	22.8	1	148	97	120	193	11	45.1	5.80	15	20	11.5	9.4	2.1	66.0	91	241.0	5.50	0.83	5.11	0	1.62	3.31	1.080	4.90	11.99	0.408674	12.9492	1.68962	-0.537815
0	0	53	23.1	0	108	70	125	212	25	46.6	6.00	17	23	19.4	16.9	2.5	59.0	106	191.0	5.41	0.83	5.49	0	2.54	2.83	1.200	4.42	12.47	0.354451	14.964	1.85954	-0.357743
0	0	53	20.8	1	148	82	113	218	13	44.1	5.40	8	22	26.5	21.5	5.0	57.0	106	389.0	5.19	0.84	3.95	0	1.50	2.23	2.152	3.71	13.53	0.274205	29.1166	2.58618	0.364946
0	1	50	20.9	0	125	65	151	262	30	48.2	5.40	19	19	18	14.7	3.3	65.0	113	265.0	4.66	0.84	4.71	0	1.49	3.28	0.571	3.51	13.62	0.257709	7.77702	1.27152	-0.304922
0	1	69	18.8	0	123	75	144	184	21	41.2	5.80	13	19	28.6	22.8	5.8	86.0	84	295.0	4.57	0.85	3.54	0	1.42	1.99	1.288	4.06	11.63	0.349097	14.9794	1.81733	-0.492197
1	0	68	27.6	1	130	76	139	269	20	46.7	6.20	18	26	20.4	17.1	3.3	46.0	103	287.0	6.61	0.85	4.73	0	1.75	2.60	1.895	5.06	13.48	0.375371	25.5446	2.45228	0.258103
1	1	63	23.5	1	131	80	143	218	18	44.9	6.70	11	19	8.5	7.0	1.5	73.0	99	386.0	5.61	0.85	5.56	0	1.27	4.21	0.872	4.11	12.32	0.333604	10.743	1.52007	-0.565426
0	0	64	28.1	1	145	79	139	189	22	48	6.20	14	19	12.3	9.9	2.4	51.0	102	234.0	5.61	0.85	5.69	0	2.11	3.57	3.079	4.62	12.13	0.380874	37.3483	2.75609	0.188475
0	0	55	21.4	1	140	81	131	233	9	45.8	5.70	13	25	20.4	16.6	3.8	52.0	109	221.0	4.55	0.86	3.92	0	1.46	2.28	1.333	4.75	14.47	0.328265	19.2885	2.23365	0.187275
0	1	56	30	1	131	78	140	163	18	45.1	6.70	12	16	19.9	16.1	3.8	80.0	101	222.0	6.51	0.86	4.20	0	1.25	2.89	0.438	4.47	10.46	0.427342	4.58148	0.581334	-0.972389
0	0	73	20.8	1	170	79	131	217	19	44.1	5.70	15	24	25.9	21.1	4.8	44.0	101	228.0	4.93	0.86	4.33	0	1.62	2.57	0.661	4.05	11.13	0.363881	7.35693	1.08298	-0.876351
0	1	49	23.2	0	131	80	160	287	65	44.9	5.50	13	21	8.3	6.9	1.4	77.0	107	332.0	5.04	0.86	4.42	0	1.32	2.90	1.271	4.63	11.54	0.401213	14.6673	1.79193	-0.528211
1	1	29	23.2	0	117	71	146	263	19	50.9	5.40	16	18	15.2	12.4	2.8	85.0	113	407.0	5.33	0.86	4.83	0	1.31	3.24	2.313	4.42	13.21	0.334595	30.5547	2.61529	0.319328
0	0	37	30.1	0	124	72	100	400	14	45.1	5.40	11	20	10.2	8.8	1.4	55.0	121	301.0	5.20	0.86	5.80	0	1.43	4.22	1.395	4.43	15.69	0.282345	21.8876	2.4432	0.343337
0	0	48	27.3	0	105	61	111	195	7	47.5	5.90	16	21	12	8.9	3.1	50.0	115	175.0	6.04	0.87	2.86	0	1.79	0.91	0.739	4.25	13.76	0.308866	10.1686	1.54826	-0.246098
0	0	28	20.1	0	101	66	124	189	7	45.6	5.50	15	18	16.3	13.7	2.6	52.0	131	256.0	4.60	0.87	3.94	0	1.61	2.17	3.166	4.59	13.47	0.340757	42.646	2.96418	0.55102
0	1	35	23	0	115	69	141	271	11	46	5.90	27	24	12.7	10.6	2.1	85.0	108	354.0	5.94	0.87	4.62	0	1.27	3.19	1.388	5.23	13.63	0.383712	18.9184	2.1611	0.057623
0	0	51	22.1	0	114	71	129	283	13	45.5	5.30	12	24	35.1	28.7	6.4	63.0	104	231.0	5.11	0.87	4.84	0	1.83	3.03	0.808	4.56	14.43	0.316008	11.6594	1.72764	-0.0888355
0	0	42	23.6	0	129	73	122.8	171.7	13	43.8	5.70	22	26	16.6	14.2	2.4	51.0	119	288.0	4.60	0.88	4.33	0	1.19	2.98	2.748	4.26	13.78	0.309144	37.8674	2.86428	0.565426
0	1	52	23.7	0	108	73	166	303	30	50.8	5.40	35	27	30.8	25.0	5.8	101.0	78	270.0	4.77	0.88	4.87	0	1.24	3.26	1.120	5.11	14.10	0.362411	15.792	2.00978	0.0132053
1	1	69	27.2	1	149	78	142	192	33	41	7.50	12	18	16.4	12.7	3.7	81.0	90	334.0	10.23	0.88	4.88	0	1.27	3.22	0.771	4.39	15.43	0.284511	11.8965	1.81527	0.0168067
0	0	36	20.1	0	104	68	126	209	16	46.5	5.70	9	20	14.2	11.3	2.9	59.0	119	190.0	5.36	0.89	3.56	0	1.54	1.86	1.508	4.79	12.96	0.369599	19.5437	2.1539	-0.0720288
0	1	26	24.1	0	128	79	157	234	19	51.6	5.00	14	15	20.4	15.4	5.0	79.0	124	396.0	5.12	0.89	3.99	0	1.19	2.59	1.633	5.12	14.65	0.349488	23.9234	2.46084	0.355342
1	0	56	22.1	1	152	71	138	200	35	46.1	5.70	26	25	23.8	19.9	3.9	56.0	105	282.0	5.35	0.89	4.38	0	1.49	2.81	2.345	4.31	14.22	0.303094	33.3459	2.76488	0.559424
0	0	44	23	0	104	66	124	276	14	45.4	5.60	11	18	16.3	13.5	2.8	68.0	99	206.0	5.27	0.89	4.45	0	1.55	2.69	0.921	4.40	12.07	0.36454	11.1165	1.54112	-0.60024
0	0	70	20.6	1	145	66	120	123	6	40.8	6.40	13	21	19.3	17.1	2.2	74.0	74	248.0	5.48	0.89	5.80	0	1.60	3.87	0.815	4.48	15.08	0.297082	12.2902	1.82369	0
0	0	43	22.5	0	104	58	127.2	110.8	9	47.3	5.40	17	23	18.3	14.8	3.5	62.0	111	317.0	4.52	0.90	2.96	0	1.21	1.38	2.364	4.47	11.53	0.387684	27.2569	2.41114	-0.0768307
0	0	40	22.6	0	98	59	96	198	12	48.9	5.40	13	18	11.4	9.2	2.2	65.0	108	288.0	4.95	0.90	3.57	0	1.25	2.15	0.382	3.92	12.52	0.313099	4.78264	0.721605	-0.608643
0	1	29	23.5	0	121	76	150	201	16	51.2	5.30	12	18	31.7	26.1	5.6	81.0	119	271.0	5.49	0.90	3.80	0	1.14	2.34	1.415	4.40	13.26	0.331825	18.7629	2.1306	-0.0288115
0	0	33	19.7	0	114	66	136	194	19	48.8	5.40	13	19	28.9	23.4	5.5	49.0	129	243.0	5.45	0.90	4.10	0	1.52	2.39	1.938	4.59	13.48	0.340504	26.1242	2.47472	0.289316
0	1	27	19.5	0	123	78	159	146	18	49.3	5.50	33	24	14	11.0	3.0	88.0	110	458.0	4.93	0.90	4.17	0	1.25	2.71	1.737	5.32	13.89	0.383009	24.1269	2.42036	0.291717
0	0	60	22.1	0	131	78	129	165	11	45.9	5.90	12	20	22	17.7	4.3	72.0	83	282.0	5.69	0.90	4.54	0	1.36	2.80	0.465	3.72	11.53	0.322637	5.36145	0.785067	-0.835534
1	1	59	20.6	0	133	81	149	217	18	47.2	5.50	11	21	23.5	19.0	4.5	88.0	87	246.0	5.29	0.90	5.10	0	1.71	3.15	1.180	4.95	16.04	0.308603	18.9272	2.32289	0.235294
0	1	60	24.7	1	138	82	138	229	44	47	5.60	16	21	20.3	15.8	4.5	101.0	74	390.0	5.40	0.91	4.13	0	1.54	2.64	1.550	4.51	14.00	0.322143	21.7	2.32125	0.223289
0	0	33	22.8	0	109	66	136	272	9	45.8	5.30	9	13	19.3	16.4	2.9	71.0	102	267.0	5.08	0.91	4.76	0	1.56	3.04	4.387	4.22	11.92	0.354027	52.293	3.08189	0.229292
0	0	69	21.2	0	126	60	129	212	24	46.2	5.40	18	24	18.3	15.3	3.0	69.0	82	221.0	5.21	0.91	4.97	0	2.07	2.93	0.753	5.39	14.94	0.360776	11.2498	1.72574	-0.0408163
0	0	29	19.4	0	99	66	142	175	13	46.6	5.20	10	15	19.9	15.9	4.0	54.0	129	378.0	4.85	0.91	4.98	0	1.60	3.25	1.915	3.81	12.29	0.310008	23.5354	2.30272	-0.0480192
0	0	45	25.6	0	127	83	120	209	12	43.6	5.40	18	27	23	20.5	2.5	47.0	120	237.0	4.29	0.91	5.03	0	1.70	3.08	3.049	3.13	9.43	0.331919	28.7521	2.38315	-0.10084
0	0	37	22.5	0	103	68	93	206	16	47.4	5.40	16	20	18.2	14.9	3.3	41.0	132	186.0	4.99	0.91	5.39	0	2.11	3.16	1.260	4.05	13.95	0.290323	17.577	2.10739	0.0516206
1	0	55	25.4	0	139	84	131	142	14	46.6	5.70	33	36	17.4	14.5	2.9	44.0	114	224.0	4.84	0.91	5.43	0	1.94	3.07	0.876	4.57	13.37	0.34181	11.7121	1.66588	-0.277311
0	0	28	20.4	0	108	60	124	202	9	45	5.10	9	16	16.9	13.7	3.2	60.0	125	193.0	4.26	0.92	3.35	0	1.67	1.57	2.650	4.25	15.23	0.279054	40.3595	3.02299	0.77551
0	1	60	24	0	112	72	143	279	23	47.5	6.40	18	22	17	13.9	3.1	76.0	100	255.0	6.64	0.92	4.03	0	1.82	2.10	2.301	4.27	10.88	0.392463	25.0349	2.2967	-0.195678
0	0	61	27.3	0	124	70	127	217	21	46.7	6.00	16	24	11.9	9.7	2.2	72.0	82	377.0	4.82	0.92	4.47	0	1.50	2.70	1.562	3.92	13.12	0.29878	20.4934	2.21061	0.0060024
1	1	28	29.2	0	129	86	156	279	44	48	5.00	39	25	16.4	13.1	3.3	71.0	128	415.0	4.73	0.92	4.58	0	1.14	3.28	1.682	4.98	11.00	0.452727	18.502	1.99948	-0.415366
1	0	42	30.1	0	120	85	133	247	9	46.6	5.50	9	14	10.8	9.1	1.7	59.0	114	290.0	5.69	0.92	4.65	0	1.39	2.94	3.132	3.40	10.74	0.316574	33.6377	2.5862	-0.0480192
0	0	37	20	0	96	65	137	195	16	48	5.60	10	15	27	22.4	4.6	63.0	116	351.0	5.00	0.92	4.67	0	1.25	3.09	3.323	3.34	12.63	0.26445	41.9695	2.8996	0.339736
0	0	29	20.3	0	98	64	129	270	13	50	5.10	17	14	8.9	7.5	1.4	53.0	130	320.0	4.64	0.92	5.00	0	2.01	2.74	2.441	5.06	14.02	0.360913	34.2228	2.7781	0.554622
0	1	48	21.9	0	91	52	149	123	23	51.3	5.20	13	23	24.8	20.2	4.6	84.0	100	571.0	5.49	0.92	5.40	0	1.47	3.69	0.572	4.84	13.95	0.346953	7.9794	1.31766	-0.234094
0	0	68	24.2	0	130	73	125	272	22	44.6	5.50	11	17	19.8	16.6	3.2	58.0	95	329.0	5.90	0.92	5.86	0	1.38	4.21	1.776	4.14	11.53	0.359063	20.4773	2.12515	-0.282113
0	1	39	23.2	0	104	66	135	243	11	48.3	5.50	25	12	12	9.4	2.6	75.0	116	218.0	4.86	0.93	3.87	0	0.95	2.67	1.158	4.20	14.95	0.280936	17.3121	2.15747	0.158463
0	0	36	20	0	95	63	94	284	19	45.3	5.20	6	18	11.6	9.0	2.6	59.0	119	240.0	4.65	0.93	3.95	0	1.71	2.09	3.678	4.25	12.49	0.340272	45.9382	2.98227	0.337335
0	0	50	28.1	0	131	64	103	179	34	45	6.00	20	26	13	10.9	2.1	65.0	100	305.0	5.66	0.93	4.61	0	1.12	3.24	0.826	4.16	11.76	0.353741	9.71376	1.39056	-0.714286
1	0	49	23.8	0	130	64	135	286	14	48.5	5.70	16	21	17.4	14.8	2.6	48.0	116	287.0	5.21	0.93	5.77	0	1.60	4.19	1.693	4.02	11.18	0.359571	18.9277	2.03021	-0.380552
1	0	49	30.5	0	123	75	117	277	16	41.3	6.00	14	16	9.5	7.7	1.8	62.0	107	152.0	5.82	0.94	3.53	0	1.11	2.24	0.786	4.54	15.34	0.295958	12.0572	1.82243	0.0204082
0	1	55	21.2	0	111	65	132	244	13	47	5.20	12	20	10.5	8.8	1.7	65.0	110	314.0	5.26	0.94	4.63	0	1.69	2.64	0.975	4.79	13.88	0.345101	13.533	1.84154	-0.110444
0	0	43	21.2	0	117	70	104	248	8	51.3	5.40	27	25	14.4	11.4	3.0	69.0	97	204.0	5.01	0.94	4.90	0	2.32	2.13	1.990	4.37	12.80	0.341406	25.472	2.40973	0.123649
0	0	54	22.2	0	118	81	127	163	15	44	5.80	13	24	14.4	11.9	2.5	63.0	103	193.0	5.19	0.94	5.30	0	1.25	3.83	1.275	4.31	17.46	0.24685	22.2615	2.59132	0.308523
1	0	59	24.4	0	120	80	131	282	24	45.8	6.50	22	28	14.1	12.1	2.0	68.0	89	336.0	7.09	0.94	5.43	0	1.20	3.92	1.302	4.45	12.55	0.354582	16.3401	1.95188	-0.271309
0	0	46	23.3	0	105	72	101.8	184.7	25	50.8	5.50	16	21	11.2	9.7	1.5	57.0	112	258.0	5.35	0.94	6.11	0	2.08	3.88	3.561	4.17	10.89	0.38292	38.7793	2.73475	0.0060024
0	0	69	24	1	157	69	129	284	18	46.1	5.80	19	21	14.6	12.6	2.0	73.0	76	270.0	4.88	0.94	6.11	0	1.71	4.23	1.671	4.53	13.72	0.330175	22.9261	2.35876	0.198079
0	0	63	23.1	0	115	64	117	213	12	48.1	5.40	10	19	18.6	15.3	3.3	61.0	97	182.0	5.03	0.95	3.49	0	1.44	1.75	1.457	4.54	11.15	0.407175	16.2456	1.87605	-0.507803
1	1	56	25.9	0	117	84	161	202	62	45.1	6.30	19	20	15.1	11.7	3.4	99.0	77	434.0	5.56	0.95	3.82	0	1.07	2.53	1.218	4.18	11.28	0.370567	13.739	1.71437	-0.607443
0	0	37	21.8	0	91	60	113	195	11	45	5.50	11	20	34.4	28.7	5.7	60.0	117	257.0	4.63	0.95	4.08	0	1.63	2.16	1.867	4.05	16.02	0.252809	29.9093	2.77902	0.572629
0	0	32	23.2	0	108	72	79	541	13	51	5.60	27	27	9.5	7.7	1.8	59.0	123	380.0	5.95	0.95	4.09	0	1.69	2.27	1.813	4.24	12.39	0.342211	22.4631	2.26144	-0.0672269
0	0	23	23.8	0	99	75	147	325	11	47.1	5.20	12	19	20.7	16.7	4.0	62.0	129	372.0	4.80	0.95	4.21	0	1.44	2.49	2.822	4.83	15.37	0.314249	43.3741	3.10471	0.816327
0	1	55	23.9	1	141	79	164	180	34	49.5	5.80	27	21	16.2	12.8	3.4	74.0	104	338.0	5.83	0.95	4.48	0	1.20	3.03	1.926	4.85	13.62	0.356094	26.2321	2.48734	0.318127
1	0	55	25.5	1	139	80	130	169	24	43.8	6.90	33	26	26.2	22.6	3.6	58.0	105	235.0	8.67	0.95	4.68	0	1.88	2.75	2.193	4.25	12.30	0.345528	26.9739	2.43962	0.0444178
0	1	29	24.4	0	136	69	162	283	45	47.9	5.10	40	22	10.6	8.5	2.1	86.0	111	469.0	5.04	0.95	4.87	0	1.16	3.63	1.279	4.73	15.07	0.313869	19.2745	2.27299	0.240096
0	1	34	21.8	0	106	58	148.6	188.2	20	50	5.00	20	24	22.3	18.1	4.2	52.0	140	277.0	5.12	0.95	5.00	0	1.66	3.12	1.875	4.70	14.42	0.325936	27.0375	2.5681	0.446579
0	0	46	24.5	0	97	68	133	205	13	46.4	5.40	13	17	14.3	12.3	2.0	58.0	111	347.0	5.32	0.95	5.30	0	2.06	2.89	2.595	4.08	11.71	0.34842	30.3875	2.52858	0.0228091
0	1	58	22.5	0	120	67	156	228	37	47.8	5.50	15	20	15.6	13.3	2.3	93.0	83	299.0	5.59	0.95	6.80	0	1.66	5.07	1.156	4.60	14.06	0.327169	16.2534	2.03604	0.0216086
0	0	41	25.8	0	95	59	125	223	7	46.8	5.10	9	14	21.8	17.6	4.2	54.0	118	225.0	5.21	0.97	3.60	0	1.25	2.16	0.931	3.93	15.02	0.261651	13.9836	1.94869	0.057623
0	0	46	23	0	117	76	133	191	9	45.4	5.20	9	17	19.7	16.3	3.4	68.0	97	299.0	5.18	0.97	4.36	0	1.62	2.42	1.305	4.20	12.80	0.328125	16.704	1.9878	-0.207683
0	1	56	19.2	0	123	75	148	353	15	48.6	5.40	14	16	22.8	17.7	5.1	75.0	103	274.0	5.03	0.97	4.60	0	1.41	2.89	0.612	4.69	16.09	0.291485	9.84708	1.67308	-0.00120048
0	1	61	23.2	1	140	98	150	208	15	50.1	5.80	33	30	19.3	16.4	2.9	64.0	106	294.0	5.77	0.97	4.67	0	1.52	2.99	0.703	4.85	13.26	0.365762	9.32178	1.43107	-0.376951
0	0	31	21.9	0	110	76	138	272	20	51	5.50	17	15	16.1	13.0	3.1	62.0	121	336.0	5.13	0.97	4.68	0	1.67	2.98	2.523	4.72	15.70	0.300637	39.6111	3.0371	0.77551
0	0	51	23	0	122	75	134	212.5	61	45.6	5.60	25	33	17.2	15.0	2.2	45.0	116	226.0	5.39	0.97	5.29	0	1.91	3.15	1.148	4.07	12.09	0.336642	13.8793	1.76413	-0.478992
0	1	59	26.4	1	148	93	151	220	15	48.5	5.40	22	26	29.2	21.6	7.6	72.0	103	301.0	5.11	0.98	3.22	0	1.25	1.80	2.483	4.51	13.35	0.337828	33.148	2.70504	0.416567
0	0	51	23.7	0	117	64	135	213	9	48	5.50	9	15	11.5	9.3	2.2	55.0	110	186.0	4.54	0.98	3.67	0	1.51	2.13	1.688	4.37	11.09	0.394049	18.7199	2.01515	-0.402161
0	0	49	28	0	101	73	137	202	12	47.7	5.20	13	21	22.4	18.6	3.8	53.0	113	243.0	5.52	0.98	4.40	0	1.81	2.39	0.780	4.68	13.59	0.344371	10.6002	1.57939	-0.259304
1	0	36	20.9	0	123	82	140	256	16	49.1	4.80	10	20	24.6	20.5	4.1	55.0	122	259.0	5.03	0.98	4.90	0	1.22	3.37	0.853	4.30	12.83	0.335152	10.944	1.56664	-0.444178
1	1	43	34.3	1	139	97	164	249	108	48.2	5.90	55	34	18.2	14.7	3.5	71.0	116	374.0	5.71	0.98	5.01	0	1.65	3.14	1.530	4.67	13.76	0.33939	21.0528	2.27599	0.156062
0	0	37	27	0	129	80	139.3	196.7	39	44.7	5.50	27	18	14.8	12.0	2.8	54.0	122	248.0	5.20	0.98	5.03	0	1.26	3.61	1.119	4.75	13.19	0.360121	14.7596	1.88649	-0.214886
0	1	63	25.9	0	134	80	168	245	21	45.8	6.10	30	27	17.8	14.8	3.0	106.0	68	331.0	5.93	0.98	6.13	0	1.56	4.46	1.390	4.45	14.26	0.312062	19.8214	2.24727	0.186074
0	0	38	26.3	0	118	71	136	299	20	47.7	4.90	20	20	30.4	24.2	6.2	55.0	119	270.0	4.80	0.99	3.60	0	1.12	2.35	2.298	3.54	12.66	0.279621	29.0927	2.53481	0.166867
1	0	56	28.8	1	108	58	133.9	196.1	28	45.7	6.60	24	23	25.3	20.4	4.9	55.0	105	262.0	6.51	0.99	4.81	0	1.36	3.12	1.792	3.98	13.54	0.293944	24.2637	2.40446	0.22449
0	1	55	23.9	1	130	88	138	145	35	49.2	6.50	15	17	10.3	8.4	1.9	68.0	108	263.0	6.96	0.99	4.83	0	1.24	3.38	1.493	4.50	14.96	0.300802	22.3353	2.41291	0.330132
0	1	39	23.3	0	133	76	163	163	25	50.4	5.10	22	21	26.2	21.7	4.5	86.0	104	474.0	4.74	0.99	4.96	0	0.97	3.68	0.883	4.62	11.79	0.391858	10.4106	1.46132	-0.67467
0	1	37	23.1	0	107	74	164	160	17	48	5.30	24	27	30.2	24.2	6.0	76.0	117	290.0	5.28	0.99	5.32	0	2.01	3.16	1.841	5.01	15.55	0.322186	28.6275	2.70178	0.54982
1	1	35	26.7	0	137	82	152	176	19	47.2	5.40	10	15	33.9	28.4	5.5	87.0	105	314.0	4.80	0.99	5.74	0	1.59	3.99	2.018	4.50	14.75	0.305085	29.7655	2.68598	0.552221
0	1	23	22.2	0	107	81	169	257	19	49.7	4.50	15	16	42	31.1	10.9	74.0	131	326.0	4.75	1.00	2.88	0	1.04	1.61	1.166	4.75	14.34	0.331241	16.7204	2.08231	0.0780312
0	0	39	21.1	0	98	60	136	191	15	46.9	5.40	25	23	30.5	23.8	6.7	53.0	120	284.0	5.04	1.00	3.44	0	1.39	1.89	2.068	4.58	12.06	0.379768	24.9401	2.34865	-0.0396158
0	0	34	18.6	0	98	61	101	250	18	48.3	5.70	21	25	15	11.8	3.2	62.0	118	233.0	4.75	1.00	3.66	0	1.78	1.68	2.296	4.37	11.35	0.385022	26.0596	2.35774	-0.127251
0	1	54	21.6	0	118	66	132	128	15	44.2	5.40	20	26	18.6	14.9	3.7	86.0	93	412.0	5.02	1.00	3.66	0	1.18	2.26	1.666	4.70	12.76	0.368339	21.2582	2.22665	-0.0516206
1	1	54	25.6	0	111	65	158.9	193.2	27	47.3	7.10	34	22	13.1	10.6	2.5	65.0	111	243.0	7.25	1.00	3.70	0	1.03	2.30	0.870	4.35	13.73	0.316824	11.9451	1.70742	-0.205282
1	1	30	26.5	0	114	59	170	255	83	51.2	5.40	75	40	20.2	15.4	4.8	66.0	131	491.0	4.26	1.00	4.00	0	0.92	2.92	1.410	4.42	12.62	0.350238	17.7942	2.04098	-0.20048
0	1	36	19	0	121	79	148	252	41	51.1	5.60	15	21	17.5	13.3	4.2	76.0	117	308.0	4.78	1.00	4.13	0	1.73	2.14	1.969	4.99	14.60	0.341781	28.7474	2.64123	0.516206
0	0	47	27.2	0	123	73	129	282	30	45.4	5.50	22	19	15.7	12.6	3.1	65.0	103	279.0	5.70	1.01	3.72	0	1.34	2.14	1.751	4.91	11.24	0.436833	19.6812	2.07197	-0.338535
0	1	26	20.6	0	123	73	148	302	21	47.3	5.50	16	20	14.1	10.8	3.3	84.0	116	373.0	4.50	1.01	4.25	0	1.37	2.76	1.952	4.50	13.89	0.323974	27.1133	2.53706	0.393758
0	1	60	20.3	0	98	67	122	202	23	44.9	5.40	9	17	19.8	17.1	2.7	96.0	78	381.0	4.73	1.01	4.62	0	1.20	3.17	1.048	3.81	13.08	0.291284	13.7078	1.80614	-0.282113
0	1	38	22.8	0	117	73	166	255	35	50.5	5.50	20	23	13.7	11.5	2.2	69.0	121	293.0	4.96	1.01	5.37	0	1.50	3.60	1.813	5.55	12.34	0.449757	22.3724	2.25471	-0.0804322
0	0	68	24.5	1	159	93	140	136	57	44.4	5.40	24	33	23.2	19.8	3.4	57.0	96	264.0	4.87	1.01	5.53	0	1.58	3.91	1.864	3.87	10.96	0.353102	20.4294	2.09684	-0.336134
0	0	51	22.1	0	123	76	130	183	39	45.3	5.80	16	22	13.9	12.3	1.6	50.0	113	251.0	5.76	1.01	5.93	0	1.73	4.18	1.568	3.76	10.67	0.35239	16.7306	1.88492	-0.486194
0	1	32	26.6	0	117	68	147	241	22	49.6	5.20	21	21	22.1	18.1	4.0	86.0	108	361.0	4.41	1.02	4.38	0	1.16	3.00	0.838	4.69	12.51	0.3749	10.4834	1.50586	-0.531813
1	1	51	27.4	1	140	91	139	287	29	44.8	5.60	20	19	10.8	9.1	1.7	69.0	111	389.0	5.01	1.02	4.52	0	0.92	3.55	3.191	5.16	12.54	0.411483	40.0151	2.84696	0.310924
0	0	70	28.6	1	177	79	140	280	15	48.4	4.80	12	19	18.7	14.8	3.9	44.0	103	251.0	6.73	1.02	6.42	0	1.91	4.19	0.512	4.73	13.04	0.36273	6.67648	1.08445	-0.470588
1	1	69	28.6	1	120	60	157	187	22	41.6	6.40	11	19	23.4	17.8	5.6	138.0	47	397.0	5.39	1.03	3.76	0	0.96	2.42	1.919	2.71	10.19	0.265947	19.5546	2.02236	-0.34934
0	0	39	20.5	0	93	60	120	172	14	45.3	5.50	12	17	26	20.4	5.6	47.0	126	193.0	5.64	1.03	4.11	0	1.28	2.64	1.528	4.07	11.66	0.349057	17.8165	1.99223	-0.362545
0	1	70	24.9	1	146	91	150	225	24	44.1	5.50	16	19	13.1	10.2	2.9	81.0	90	319.0	4.72	1.03	4.18	0	1.18	2.82	1.469	4.09	11.99	0.341118	17.6133	1.99724	-0.336134
1	0	52	25.2	0	135	88	138	327	17	50.2	5.60	36	22	27.7	22.6	5.1	58.0	107	277.0	5.09	1.03	4.60	0	1.67	2.74	2.460	4.46	12.67	0.352013	31.1682	2.60428	0.218487
0	0	67	25.9	0	135	76	126	297	33	45.1	5.70	24	20	17.9	15.0	2.9	63.0	94	288.0	5.75	1.03	5.17	0	1.53	3.50	1.767	3.66	15.13	0.241904	26.7347	2.60427	0.489796
0	0	44	30.2	0	99	51	127	204	12	42.8	5.60	10	15	20.4	16.9	3.5	56.0	114	292.0	5.76	1.03	5.18	0	1.80	3.08	2.993	3.93	12.08	0.325331	36.1554	2.72104	0.168067
0	0	50	24.2	0	125	52	119	146	12	45.9	5.70	24	30	19.1	15.5	3.6	65.0	100	303.0	6.02	1.03	5.96	0	1.51	4.11	1.526	4.34	14.66	0.296044	22.3712	2.39442	0.314526
0	1	60	26	1	114	67	145	177	19	46.6	5.40	17	18	27.8	22.0	5.8	79.0	98	340.0	4.89	1.04	3.89	0	1.32	2.33	0.911	4.76	13.16	0.361702	11.9888	1.67681	-0.326531
0	0	52	29.6	1	139	81	117	196	12	48.4	5.50	8	17	22.6	18.3	4.3	62.0	104	331.0	5.14	1.04	4.13	0	1.43	2.38	1.595	3.75	10.59	0.354108	16.891	1.89123	-0.490996
0	1	54	21	0	105	72	154	194	20	47.5	5.40	28	29	14.6	11.7	2.9	78.0	103	361.0	4.62	1.04	5.02	0	1.60	3.22	1.728	5.52	13.84	0.398844	23.9155	2.40844	0.272509
0	0	54	22.3	0	113	70	139	207	22	46	5.60	23	21	19.1	16.1	3.0	53.0	109	204.0	5.02	1.04	5.17	0	1.55	3.22	1.204	4.51	12.32	0.366071	14.8333	1.84269	-0.392557
1	1	51	24.5	1	134	88	143	161	67	47.3	5.60	28	29	18.8	15.5	3.3	97.0	82	344.0	5.85	1.04	5.50	0	1.42	3.73	3.836	4.58	13.82	0.331404	53.0135	3.20322	0.692677
1	1	21	35.1	1	152	92	165	275	26	48.7	5.70	49	25	14.8	10.8	4.0	73.0	134	551.0	4.77	1.05	3.79	0	1.18	2.48	1.264	4.85	13.22	0.366868	16.7101	2.01237	-0.121248
0	0	65	25	0	123	73	131	192	9	45.4	5.50	12	16	12.8	10.5	2.3	59.0	97	283.0	5.21	1.05	4.57	0	1.58	2.84	1.559	4.84	12.20	0.396721	19.0198	2.08494	-0.232893
1	0	43	29.6	1	133	76	109	282	24	44.4	6.30	14	18	10.2	8.4	1.8	43.0	126	298.0	5.46	1.05	4.80	0	1.44	3.07	1.001	4.38	12.28	0.356678	12.2923	1.65266	-0.511405
0	1	43	21.8	0	118	77	161	208	44	46.5	5.30	31	21	28.9	23.9	5.0	102.0	82	274.0	4.64	1.05	4.97	0	1.43	3.42	1.257	4.69	13.57	0.345615	17.0575	2.05389	-0.0348139
1	1	55	23.3	1	154	83	148	233	45	47.4	5.80	24	26	10.7	8.8	1.9	75.0	103	517.0	5.18	1.05	6.57	0	1.65	4.52	1.935	4.69	9.54	0.491614	18.4599	1.94324	-0.352941
0	0	53	23.3	1	127	74	110	164	12	45.1	5.80	16	24	8.8	7.2	1.6	70.0	90	265.0	5.61	1.06	3.30	0	1.22	1.91	1.195	3.63	12.89	0.281614	15.4035	1.91185	-0.2509
1	1	66	26.9	1	145	84	154	177	36	43.1	5.70	19	23	29.9	22.9	7.0	94.0	77	350.0	5.18	1.06	3.75	0	0.89	2.41	0.948	4.31	13.79	0.312545	13.0729	1.80135	-0.145258
0	0	56	20.2	0	111	64	120	183	13	44.1	5.90	14	19	16.5	13.7	2.8	64.0	97	141.0	5.16	1.06	4.17	0	1.03	2.94	0.773	3.84	15.55	0.246945	12.0201	1.834	0.0204082
1	1	24	24.3	0	118	74	152	278	40	54.2	5.40	64	33	17.5	14.1	3.4	71.0	132	440.0	4.79	1.06	5.29	0	1.93	3.19	0.873	5.26	12.56	0.41879	10.9649	1.5535	-0.498199
0	0	55	24.1	0	124	77	128	234	12	50.4	5.50	18	22	13.5	10.9	2.6	67.0	93	329.0	5.09	1.07	3.66	0	1.29	2.14	1.074	4.31	12.49	0.345076	13.4143	1.75129	-0.418968
0	1	23	21.1	0	117	68	155	318	17	50.1	5.40	23	21	19.3	15.1	4.2	79.0	127	417.0	4.68	1.07	3.86	0	1.56	2.16	1.343	4.48	13.02	0.344086	17.4859	2.0461	-0.135654
1	1	42	28.1	0	104	60	164	180	35	51	5.80	24	19	17.9	13.6	4.3	72.0	115	340.0	4.84	1.07	4.07	0	1.07	2.84	1.288	4.47	13.29	0.336343	17.1175	2.0406	-0.0804322
1	1	47	24.5	0	111	73	144	161	20	46	5.50	25	22	22.6	18.0	4.6	80.0	106	260.0	5.58	1.07	4.18	0	1.29	2.56	1.711	4.40	14.86	0.296097	25.4255	2.53575	0.430972
1	0	45	25.1	0	118	65	131.7	289.9	12	46.7	5.50	13	20	14.8	12.8	2.0	64.0	105	323.0	5.28	1.07	4.69	0	1.33	3.03	1.691	4.14	10.49	0.394662	17.7386	1.93623	-0.452581
1	0	62	23.6	0	102	65	123	231	12	46.8	5.80	21	25	13.2	10.9	2.3	53.0	102	325.0	6.03	1.07	4.78	0	1.81	2.64	1.537	4.48	12.99	0.344881	19.9656	2.17699	-0.0420168
0	1	46	22.1	0	103	74	145	229	27	45.6	5.50	16	21	16	13.0	3.0	91.0	92	321.0	4.90	1.07	5.18	0	1.58	3.36	1.100	4.35	13.06	0.333078	14.366	1.85188	-0.254502
0	0	59	20.3	1	135	85	129	287	14	46.5	5.70	12	23	19.2	16.9	2.3	55.0	103	375.0	4.96	1.07	5.87	0	1.90	3.75	2.025	5.18	13.87	0.373468	28.0867	2.57108	0.406963
0	1	24	28.2	0	129	83	163	310	28	50.4	5.40	16	19	23.3	19.0	4.3	86.0	115	291.0	4.81	1.08	4.06	0	1.25	2.62	1.801	4.08	13.44	0.303571	24.2054	2.39602	0.204082
0	1	61	22.6	0	116	78	144	213	11	45.3	8.00	12	13	12.2	10.4	1.8	63.0	107	104.0	13.93	1.08	4.67	0	1.45	2.82	2.044	3.59	11.67	0.307626	23.8535	2.28452	-0.127251
0	1	64	22	0	116	74	141	240	15	43.2	5.50	24	22	17.9	14.5	3.4	87.0	86	211.0	5.14	1.08	4.95	0	1.19	3.59	1.001	4.45	12.35	0.360324	12.3623	1.66207	-0.486194
0	1	38	26.3	0	121	73	157	295	18	47.8	5.30	16	24	18.9	15.7	3.2	93.0	95	335.0	4.17	1.08	5.21	0	1.73	3.31	0.827	5.33	13.21	0.403482	10.9247	1.58679	-0.352941
1	0	53	23.9	1	128	70	121	269	21	47.3	6.00	21	28	14.7	12.8	1.9	73.0	85	300.0	5.30	1.08	7.16	0	1.75	5.14	1.521	4.08	14.28	0.285714	21.7199	2.34003	0.253301
1	0	46	30.7	0	108	64	132	225	13	45.4	5.50	13	19	22.8	18.7	4.1	52.0	116	224.0	5.01	1.09	4.52	0	1.39	3.01	4.382	4.47	11.91	0.375315	52.1896	3.0794	0.22569
0	1	38	32.5	0	105	63	159	236	25	46.3	5.60	15	20	23.2	19.5	3.7	75.0	116	317.0	5.43	1.09	5.23	0	1.19	3.75	1.118	4.34	13.82	0.314038	15.4508	1.97033	-0.0540216
0	0	38	24.5	0	133	80	142	164	23	49	5.40	24	23	16.8	13.1	3.7	63.0	114	353.0	4.77	1.10	4.16	0	1.39	2.51	1.282	3.77	13.33	0.282821	17.0891	2.04131	-0.0684274
0	1	60	21	0	103	63	136	160	19	44.3	5.70	50	41	15.4	12.9	2.5	105.0	70	474.0	4.76	1.10	4.55	0	1.45	2.82	3.235	4.46	9.78	0.456033	31.6383	2.48944	-0.0756303
0	0	41	24.7	1	147	86	132	230	100	49.2	5.60	40	32	22.5	18.9	3.6	54.0	118	338.0	5.33	1.10	5.09	0	1.82	3.16	2.892	4.79	12.48	0.383814	36.0922	2.74051	0.252101
0	1	56	28.3	1	140	80	148	231	49	47.7	5.80	18	24	32.8	25.8	7.0	75.0	103	405.0	5.55	1.10	5.26	0	2.39	2.77	2.938	5.16	14.64	0.352459	43.0123	3.04681	0.7491
0	0	44	24.8	0	113	64	129	214	35	44.9	4.50	21	19	20.3	16.5	3.8	60.0	112	334.0	5.17	1.11	4.98	0	1.59	2.99	1.282	3.98	14.04	0.283476	17.9993	2.1368	0.092437
0	1	59	23	1	143	84	149	239	21	45.7	6.00	14	19	16.4	13.6	2.8	81.0	96	345.0	5.80	1.11	5.02	0	1.48	3.39	0.775	4.43	12.09	0.366419	9.36975	1.37121	-0.657863
1	1	67	24.3	0	117	74	147	266	16	44.7	5.80	13	20	19.2	15.9	3.3	86.0	85	268.0	5.58	1.11	5.78	0	1.78	3.87	1.960	3.78	11.93	0.316848	23.3828	2.27753	-0.102041
0	1	34	21.8	0	92	61	148	255	15	46.9	5.40	23	19	20.5	17.0	3.5	91.0	100	367.0	4.73	1.12	4.32	0	1.19	2.83	0.374	5.12	14.67	0.349012	5.48658	0.989616	-0.128451
0	1	68	23.6	0	117	67	147	134	22	47.7	5.60	37	31	18.3	15.7	2.6	86.0	85	329.0	5.37	1.12	4.82	0	1.45	3.11	2.328	3.72	14.77	0.251862	34.3846	2.83157	0.636255
0	0	52	22.3	0	113	70	133	203	13	50.5	5.30	12	19	14	11.9	2.1	67.0	95	344.0	5.13	1.12	5.64	0	1.40	3.93	2.413	4.10	14.40	0.284722	34.7472	2.81767	0.611044
1	1	46	30	1	129	84	176	258	64	42.9	6.50	80	43	12.4	9.3	3.1	127.0	61	546.0	4.58	1.13	2.94	0	0.69	1.69	3.026	4.46	15.31	0.291313	46.3281	3.16644	0.842737
0	1	36	27.4	0	111	75	166	180	45	45.4	5.80	63	30	24.6	18.9	5.7	86.0	105	385.0	5.25	1.13	3.20	0	1.07	1.84	1.788	4.86	18.00	0.27	32.184	3.0021	0.561825
0	0	38	21.9	0	118	61	126	208	14	48.2	5.30	25	23	19.4	16.6	2.8	63.0	115	228.0	5.28	1.13	4.38	0	1.61	2.67	3.326	4.27	11.75	0.363404	39.0805	2.78215	0.132053
0	0	38	20	0	97	61	113	163	7	45.6	5.00	10	19	15.3	12.1	3.2	53.0	122	224.0	4.79	1.13	4.41	0	1.30	2.64	2.010	3.89	13.87	0.280461	27.8787	2.56365	0.402161
0	0	36	20.9	0	111	65	146.5	291.6	20	47.2	5.40	19	23	18.9	15.7	3.2	70.0	101	396.0	5.11	1.13	4.58	0	1.34	2.75	0.987	3.60	13.58	0.265096	13.4035	1.81342	-0.168067
0	0	25	19.8	0	100	68	141	284	16	47.7	5.10	9	17	14.4	12.6	1.8	60.0	127	292.0	5.17	1.13	4.98	0	1.74	2.95	2.725	4.82	12.61	0.382236	34.3623	2.69851	0.258103
0	1	59	23	0	118	57	139	247	18	45.8	6.10	11	17	10.7	9.2	1.5	80.0	98	237.0	5.21	1.13	5.75	0	1.10	4.40	0.763	5.04	17.09	0.294909	13.0397	2.02811	0.0516206
0	0	46	21.9	0	113	71	124	210	9	45.4	5.40	34	23	21.9	18.8	3.1	44.0	122	201.0	4.71	1.14	4.64	0	1.68	2.85	2.928	4.11	12.45	0.33012	36.4536	2.74884	0.2497
1	1	51	28.3	0	116	68	155	211	35	50.2	5.50	44	28	19.4	16.6	2.8	75.0	107	361.0	5.08	1.14	4.71	0	1.40	3.10	0.953	4.88	11.72	0.416382	11.1692	1.5282	-0.654262
0	0	59	23.5	0	104	74	138	198	15	46.3	5.90	11	19	12.4	10.5	1.9	60.0	100	263.0	5.33	1.14	6.17	0	1.83	4.22	3.169	4.13	12.72	0.324686	40.3097	2.86426	0.348139
1	0	56	27.5	1	117	75	123.9	225.3	37	46.6	6.00	12	25	32.4	27.5	4.9	80.0	75	524.0	5.44	1.14	6.28	0	1.60	4.32	1.249	4.02	13.33	0.301575	16.6492	2.01523	-0.0984394
0	0	66	20.6	0	124	69	110	194	18	44.7	6.30	18	19	16.7	13.6	3.1	81.0	68	252.0	5.45	1.15	3.82	0	1.12	2.25	1.211	3.64	12.85	0.283268	15.5613	1.91977	-0.255702
0	0	47	21.7	0	138	79	129	292	21	45.3	5.60	10	19	13.5	11.3	2.2	46.0	119	150.0	4.94	1.15	4.27	0	1.29	2.78	2.585	4.02	11.99	0.335279	30.9942	2.56238	0.0792317
1	1	52	26	1	139	70	142	209	45	43.8	8.20	23	17	24.3	20.0	4.3	62.0	115	218.0	10.36	1.15	4.94	0	1.29	3.29	0.564	4.52	11.24	0.402135	6.33936	0.939079	-0.879952
0	0	48	22.6	0	124	87	122	123	11	47.1	5.60	11	19	19.1	15.6	3.5	56.0	111	223.0	5.26	1.15	6.25	0	1.58	4.19	1.207	4.56	14.60	0.312329	17.6222	2.15184	0.132053
1	0	58	24.9	1	140	87	134	191	18	46.9	5.80	20	20	31.9	27.2	4.7	62.0	100	254.0	5.43	1.16	4.25	0	1.23	2.84	2.173	4.20	12.44	0.337621	27.0321	2.44929	0.0804322
0	0	43	20.9	0	131	74	90	209	21	45.6	5.10	23	27	14.7	12.9	1.8	41.0	127	213.0	4.26	1.16	5.31	0	1.76	3.26	1.703	3.35	12.57	0.266508	21.4067	2.22306	-0.0696279
0	0	66	21	1	128	66	124	177	12	47.5	5.50	13	20	26.5	22.9	3.6	74.0	77	285.0	5.18	1.16	5.71	0	1.26	4.00	1.297	4.09	14.37	0.284621	18.6379	2.19282	0.159664
1	1	42	25.6	0	111	72	170	367	100	52.8	5.90	48	28	9.7	8.1	1.6	67.0	119	302.0	5.58	1.16	6.50	0	1.11	5.02	1.214	4.01	11.43	0.350831	13.876	1.73126	-0.582233
0	0	40	24.2	0	108	75	140.7	264.7	14	46.2	5.60	13	16	17.5	14.8	2.7	55.0	118	282.0	4.97	1.17	4.47	0	0.91	3.16	0.781	3.71	13.53	0.274205	10.5669	1.5726	-0.278511
0	0	54	18.8	1	123	67	125	305	150	43.4	5.50	12	43	15.2	12.6	2.6	68.0	92	300.0	5.91	1.17	4.84	0	1.45	3.01	2.630	4.65	13.73	0.338674	36.1099	2.81367	0.527011
0	0	44	23.6	0	111	79	135	253	20	48	5.00	15	22	12.5	10.4	2.1	59.0	113	247.0	5.05	1.18	3.48	0	0.83	2.42	2.194	4.58	13.17	0.34776	28.895	2.55709	0.272509
1	0	35	23	0	110	64	128	235	16	49.8	5.70	22	21	21.6	18.6	3.0	69.0	103	319.0	4.76	1.18	4.55	0	1.07	3.16	2.825	4.05	13.85	0.292419	39.1262	2.90133	0.596639
1	1	53	27.9	0	109	73	155.7	227.4	28	46.6	8.60	17	18	18.1	15.2	2.9	50.0	124	209.0	9.59	1.18	4.55	0	0.92	3.42	1.697	4.75	15.34	0.309648	26.032	2.59209	0.476591
0	0	60	19.8	1	148	90	121	336	14	52.6	6.10	17	25	12.6	10.4	2.2	76.0	77	309.0	5.57	1.18	4.91	0	1.96	2.75	1.252	2.68	11.24	0.238434	14.0725	1.73652	-0.59904
0	1	54	24.6	0	110	71	140	210	106	48.5	5.80	22	26	19.2	16.3	2.9	95.0	82	469.0	5.01	1.18	5.02	0	1.07	3.83	3.442	4.00	12.76	0.31348	43.9199	2.95227	0.388956
1	1	47	24.1	1	118	74	141	163	30	44.8	5.20	31	19	22.1	17.1	5.0	79.0	108	451.0	4.56	1.19	3.88	0	1.08	2.39	0.993	3.78	14.88	0.254032	14.7758	1.99434	0.0636255
0	0	47	25.8	0	99	64	138	245	38	43.5	5.40	25	23	22.4	18.9	3.5	56.0	112	253.0	5.34	1.19	4.47	0	0.99	3.18	2.670	3.56	11.35	0.313656	30.3045	2.50865	-0.032413
0	1	41	22.2	0	103	72	157	302	17	48.3	5.70	11	18	15.7	13.0	2.7	83.0	107	300.0	4.91	1.19	4.74	0	1.52	3.01	0.607	4.88	14.27	0.341976	8.66189	1.42009	-0.165666
0	1	55	23.8	0	97	65	158	218	16	49.1	5.20	18	26	24.4	19.7	4.7	81.0	100	378.0	4.73	1.19	4.88	0	1.07	3.30	0.592	4.73	13.63	0.347029	8.06896	1.30899	-0.297719
0	1	41	27.4	0	109	71	156	157	25	45.8	5.40	34	28	23.7	19.1	4.6	95.0	91	521.0	4.79	1.19	4.92	0	1.22	3.51	1.527	4.33	14.18	0.30536	21.6529	2.33052	0.241297
0	0	62	23.4	0	131	79	141	180	9	46.6	6.20	13	20	18.4	15.1	3.3	50.0	105	190.0	6.34	1.19	4.98	0	1.24	3.21	0.773	4.24	14.82	0.2861	11.4559	1.73581	-0.0492197
0	0	51	20.8	0	130	84	144	134	57	46.6	5.20	23	22	17.6	14.6	3.0	56.0	108	260.0	4.93	1.19	5.11	0	1.33	3.41	3.110	3.66	12.19	0.300246	37.9109	2.77418	0.202881
0	1	65	22.3	1	161	79	140	289	22	49.2	6.20	29	23	10.1	8.1	2.0	75.0	97	272.0	5.37	1.19	5.12	0	1.61	3.24	4.371	4.21	12.36	0.340615	54.0256	3.13741	0.334934
0	1	28	20.6	0	124	82	155.7	182.4	14	46.8	5.70	10	16	11.6	10.4	1.2	97.0	96	362.0	4.94	1.19	6.39	0	1.28	4.81	1.899	4.55	13.26	0.343137	25.1807	2.4248	0.206483
0	1	65	21.7	1	153	90	129	189	14	51.5	3.90	15	24	83	78.0	5.0	80.0	94	437.0	4.54	1.20	2.52	0	0.83	1.40	0.951	4.72	11.48	0.41115	10.9175	1.49382	-0.707083
0	1	50	19.6	0	114	68	139	235	16	47.3	5.70	12	19	15	12.4	2.6	83.0	100	383.0	5.16	1.20	4.94	0	1.54	3.04	2.255	4.82	12.88	0.374224	29.0444	2.54551	0.211285
0	0	58	23	0	111	72	135	290	25	48.3	5.50	15	22	18.9	15.9	3.0	68.0	90	294.0	5.28	1.20	5.32	0	1.59	3.54	3.085	3.85	12.34	0.311994	38.0689	2.78628	0.246098
0	0	40	21.2	0	118	64	121	174	16	47.2	5.50	16	19	24.5	21.1	3.4	57.0	116	162.0	5.01	1.20	5.44	0	1.34	3.94	2.418	3.59	11.39	0.315189	27.541	2.4149	-0.0876351
0	1	54	21.1	0	115	72	151	169	21	45.7	5.30	25	24	27	22.0	5.0	75.0	105	215.0	4.51	1.20	5.50	0	1.50	3.65	1.034	4.66	14.20	0.328169	14.6828	1.94333	-0.0216086
0	0	46	22.6	0	105	73	100	286	35	48.6	5.60	23	34	42.3	35.1	7.2	38.0	128	214.0	4.76	1.21	4.21	0	1.38	2.57	1.319	4.76	13.82	0.344428	18.2286	2.13566	0.0636255
1	1	61	27	0	115	76	152	212	17	46	5.60	17	22	22.6	18.2	4.4	68.0	103	426.0	4.55	1.21	4.24	0	0.96	2.68	0.669	4.11	13.20	0.311364	8.8308	1.37343	-0.39976
1	1	53	27.2	1	154	90	153	248	42	48.3	6.80	36	26	20.7	16.7	4.0	72.0	107	394.0	6.46	1.21	4.71	0	1.24	3.14	1.799	4.87	13.84	0.351879	24.8982	2.44871	0.296519
0	1	54	24.4	0	121	73	156	179	30	44.9	5.50	24	21	16.9	14.4	2.5	79.0	102	362.0	5.09	1.21	5.02	0	1.55	3.32	1.708	4.71	13.27	0.354936	22.6652	2.32014	0.120048
0	0	64	20.3	0	129	77	123	145	22	45.6	6.70	11	17	14.4	11.9	2.5	63.0	95	316.0	8.39	1.21	5.27	0	1.70	3.34	1.091	4.06	12.96	0.313272	14.1394	1.83021	-0.290516
0	0	57	27.1	0	115	70	128	349	15	48.1	5.70	9	20	14.3	11.8	2.5	63.0	101	212.0	5.00	1.22	3.93	0	1.36	2.37	3.376	4.61	11.73	0.393009	39.6005	2.79438	0.133253
0	0	55	26.8	0	108	68	125	169	15	46.7	5.40	16	24	39.3	31.9	7.4	48.0	112	196.0	4.67	1.22	4.06	0	1.54	2.33	2.442	4.34	13.75	0.315636	33.5775	2.74219	0.494598
0	1	29	23.9	0	104	61	153	307	36	45.8	5.40	12	20	16.1	13.0	3.1	68.0	130	439.0	5.12	1.22	4.52	0	1.28	2.88	2.071	4.30	12.82	0.335413	26.5502	2.45232	0.153661
0	0	54	29.3	0	125	80	129	183	45	44.7	5.80	19	53	10.9	8.4	2.5	74.0	83	371.0	5.08	1.22	4.80	0	1.41	2.84	2.050	5.21	13.97	0.372942	28.6385	2.5968	0.438175
0	0	38	24.2	0	101	64	87	350	17	47.3	5.40	14	17	17.1	14.6	2.5	64.0	111	421.0	5.02	1.22	4.89	0	1.07	3.55	4.839	3.61	8.62	0.418794	41.7122	2.7361	-0.00120048
0	1	66	21.2	0	124	76	158	243	36	46.2	5.60	42	34	16.7	14.1	2.6	74.0	97	372.0	4.84	1.22	5.24	0	1.68	3.25	1.853	4.69	12.30	0.381301	22.7919	2.27116	-0.0804322
1	0	58	24.5	0	136	88	136	257	20	46.6	6.10	16	21	18	15.3	2.7	75.0	80	371.0	5.69	1.22	6.04	0	1.88	3.68	1.532	3.78	11.43	0.330709	17.5108	1.96391	-0.408163
0	0	47	26.8	0	100	67	138	219	15	43.6	5.10	17	19	12.5	10.5	2.0	62.0	108	262.0	4.75	1.23	3.99	0	1.25	2.30	2.443	3.50	11.30	0.309735	27.6059	2.41308	-0.0888355
0	0	58	23.2	0	109	71	134	155	11	43.2	5.30	10	23	28.7	23.7	5.0	72.0	84	359.0	4.92	1.23	4.05	0	1.30	2.45	1.779	4.30	13.75	0.312727	24.4612	2.42543	0.262905
1	0	69	31.7	1	125	107	139	278	25	49	6.40	19	19	22.9	18.0	4.9	52.0	98	284.0	6.07	1.23	4.27	0	0.94	3.03	3.905	4.52	12.73	0.355067	49.7107	3.07444	0.410564
0	0	50	23.6	0	107	55	113	209	9	47.9	5.40	14	23	21	17.4	3.6	66.0	99	263.0	5.36	1.23	5.42	0	1.90	3.12	1.619	4.07	11.57	0.351772	18.7318	2.03797	-0.345738
0	0	44	26.8	0	124	69	137	253	19	47.6	5.60	15	23	11.1	8.8	2.3	50.0	118	266.0	4.52	1.23	5.48	0	1.63	3.39	1.311	4.40	13.13	0.33511	17.2134	2.03678	-0.118848
1	1	43	28.3	0	126	78	143	211	109	49	5.60	96	56	21.2	17.9	3.3	77.0	112	366.0	4.90	1.23	5.63	0	1.09	4.11	1.168	4.21	12.61	0.333862	14.7285	1.85134	-0.336134
0	0	46	20.2	0	106	63	129	235	13	49.4	5.60	11	21	12.3	10.9	1.4	60.0	110	184.0	5.09	1.23	6.44	0	1.88	4.37	1.259	4.36	13.13	0.332064	16.5307	1.9963	-0.159664
0	1	29	23.1	0	116	69	165	228	19	47	5.00	31	26	25	20.9	4.1	80.0	121	310.0	5.34	1.24	4.23	0	1.25	2.53	1.014	4.80	14.87	0.322798	15.0782	2.01392	0.0720288
0	0	49	22.2	0	119	67	130	155	12	48.1	5.40	12	20	13.6	11.8	1.8	51.0	114	234.0	5.10	1.24	5.11	0	1.75	3.21	2.480	3.98	11.13	0.357592	27.6024	2.40524	-0.108043
0	0	54	24.7	1	123	71	133	182	16	47.9	7.20	14	21	20.6	16.5	4.1	56.0	107	360.0	7.51	1.25	3.13	0	1.18	1.69	1.930	4.63	11.16	0.414875	21.5388	2.15854	-0.265306
1	1	51	22.3	0	129	74	137	158	26	47.7	7.50	21	21	22.4	18.0	4.4	74.0	107	283.0	7.70	1.25	4.22	0	1.35	2.72	0.936	4.51	13.25	0.340377	12.402	1.71599	-0.280912
1	1	43	29.6	0	114	87	169	208	61	46.9	5.50	107	67	34.4	26.9	7.5	85.0	102	365.0	4.87	1.25	4.77	0	1.27	3.13	1.109	5.08	13.87	0.366258	15.3818	1.96897	-0.0468187
0	1	60	20.7	0	118	74	141	257	21	40.3	7.30	12	11	31.8	27.1	4.7	59.0	111	285.0	7.98	1.25	5.94	0	1.30	4.33	1.333	3.95	14.21	0.277973	18.9419	2.19868	0.145258
0	0	41	23.4	0	85	53	128	318	16	45.5	5.60	13	19	18.8	16.4	2.4	69.0	99	294.0	4.78	1.25	6.53	0	1.75	4.38	2.157	2.82	10.83	0.260388	23.3603	2.22535	-0.241297
0	1	61	27	1	131	89	160	167	32	46.9	6.40	44	30	19.2	15.0	4.2	81.0	96	359.0	5.23	1.26	4.16	0	0.95	2.63	1.025	4.75	14.53	0.32691	14.8933	1.97898	0.0252101
1	1	67	26.7	1	113	74	132	356	18	47.1	9.10	25	23	31.4	25.8	5.6	87.0	84	558.0	10.13	1.26	5.10	0	1.49	3.31	1.726	4.35	12.07	0.360398	20.8328	2.16922	-0.181273
1	0	45	23.5	0	136	86	157	304	20	47.8	5.60	15	17	25.7	22.2	3.5	76.0	86	396.0	5.50	1.26	5.62	0	1.58	3.86	1.629	4.62	12.54	0.368421	20.4277	2.1746	-0.118848
0	1	61	24.4	1	145	85	139	256.6	15	45.8	6.30	12	23	20.5	17.6	2.9	76.0	98	272.0	6.73	1.26	6.62	0	1.71	4.71	0.769	4.50	13.57	0.331614	10.4353	1.5625	-0.27491
0	0	44	24	0	99	60	129	294	25	42.7	5.50	14	25	17	15.4	1.6	68.0	99	401.0	3.55	1.26	6.85	0	1.58	4.88	1.687	3.70	12.48	0.296474	21.0538	2.20151	-0.112845
1	1	32	26.9	0	132	81	159	218	23	49.5	5.40	40	31	25.7	21.1	4.6	69.0	127	302.0	5.71	1.27	4.60	0	1.44	2.96	1.564	4.27	13.66	0.312592	21.3642	2.28452	0.157263
1	0	53	30.9	1	166	88	134	158	42	48.9	5.50	64	42	16.2	12.7	3.5	78.0	78	492.0	5.15	1.27	4.74	0	1.52	2.99	2.325	5.26	12.11	0.434352	28.1558	2.47252	0.0348139
1	0	61	24.3	0	106	67	127	254	15	45.9	5.70	16	27	21.1	17.9	3.2	74.0	79	255.0	5.41	1.27	5.36	0	1.77	3.32	2.776	4.15	12.75	0.32549	35.394	2.73589	0.301321
1	1	57	25.6	0	133	83	148.2	204.6	27	45	6.10	27	26	16.4	14.0	2.4	93.0	83	345.0	5.38	1.27	5.78	0	1.07	4.06	1.869	4.61	14.04	0.328348	26.2408	2.51378	0.37455
0	0	41	18.5	0	96	57	108	261	3	47.9	5.3	8	20	13.8	11.7	2.1	66.0	104	241.0	4.03	1.28	4.16	0	1.42	2.50	1.248	3.83	14.35	0.266899	17.9088	2.15162	0.118848
0	1	40	24.9	0	120	71	145	206	43	49	5.60	22	23	20.2	16.8	3.4	75.0	115	268.0	5.03	1.28	4.91	0	0.97	3.77	3.669	4.31	11.54	0.373484	42.3403	2.85205	0.117647
1	0	45	24.9	0	114	74	107	106	14	44.4	5.50	12	17	19.9	15.9	4.0	54.0	115	264.0	5.36	1.29	3.18	0	0.85	2.00	3.340	4.41	11.21	0.393399	37.4414	2.71372	0.0312125
0	0	49	24.7	0	121	80	143	211	14	48.9	5.40	15	21	22.6	19.2	3.4	66.0	99	338.0	5.34	1.29	4.62	0	1.38	2.91	1.164	4.31	14.52	0.296832	16.9013	2.1048	0.102041
0	1	66	26.5	0	138	75	152	213	35	49.4	6.50	22	24	30.7	25.9	4.8	80.0	94	444.0	7.47	1.29	4.86	0	1.92	2.81	2.987	4.66	12.52	0.372204	37.3972	2.77821	0.280912
0	1	66	26.6	1	153	92	139	181	16	42.1	6.70	14	17	17.9	15.3	2.6	63.0	103	238.0	6.50	1.29	5.27	0	1.43	3.62	1.058	4.00	15.56	0.257069	16.4625	2.1492	0.151261
1	1	49	23.8	0	113	67	157	148	29	48.4	6.00	33	33	24.2	20.0	4.2	75.0	108	296.0	6.39	1.29	5.32	0	1.54	3.48	1.392	4.73	11.35	0.41674	15.7992	1.85732	-0.496999
1	0	44	26.6	0	99	51	137	224	14	51.8	5.70	39	30	29.3	25.3	4.0	51.0	118	291.0	5.29	1.29	5.33	0	1.57	3.48	1.644	4.09	11.49	0.355962	18.8896	2.04254	-0.356543
1	0	51	22.8	0	114	70	133	222	15	46.9	6.20	14	21	15.8	13.4	2.4	59.0	107	260.0	5.47	1.30	4.77	0	1.13	3.50	1.287	4.36	14.17	0.307692	18.2368	2.15818	0.117647
1	0	56	25.2	0	114	61	141	219	21	48.1	5.80	25	27	27.5	23.5	4.0	67.0	92	277.0	6.09	1.30	4.91	0	1.14	3.33	2.397	4.87	11.69	0.416595	28.0209	2.44652	-0.0336134
0	0	43	25.2	0	114	78	142	232	9	46	5.50	19	22	15.9	13.3	2.6	59.0	113	294.0	4.69	1.30	5.36	0	1.21	3.68	2.382	4.00	12.31	0.324939	29.3224	2.52364	0.0972389
1	1	39	27.6	0	117	74	155	255	23	49.1	5.70	26	22	19.7	16.4	3.3	79.0	113	302.0	5.18	1.31	5.44	0	1.10	4.06	1.046	4.94	14.60	0.338356	15.2716	2.00867	0.0420168
0	1	57	23.2	0	111	72	140	186	16	46.3	5.80	18	18	26.7	21.8	4.9	75.0	102	265.0	4.80	1.31	5.93	0	1.61	4.18	2.614	3.89	12.71	0.306058	33.2239	2.67038	0.259304
1	1	57	23.6	1	142	96	143	202	22	47.3	5.40	13	22	46.1	39.2	6.9	93.0	83	297.0	5.41	1.31	7.05	0	1.71	4.99	1.690	4.44	12.93	0.343387	21.8517	2.26381	0.00480192
0	0	54	20.3	1	148	94	118.9	225.5	25	47.3	5.70	30	27	23.3	19.3	4.0	47.0	113	204.0	5.18	1.32	4.53	0	1.28	2.89	1.192	3.83	13.97	0.274159	16.6522	2.0546	0.0192077
1	1	61	31.7	0	126	80	153	140	57	43.9	5.50	21	22	11.2	8.7	2.5	92.0	82	435.0	4.89	1.32	4.84	0	1.41	2.94	1.110	3.93	13.15	0.298859	14.5965	1.87304	-0.229292
0	1	69	27.5	1	152	77	164	173	22	51.1	5.30	19	19	25.4	21.0	4.4	67.0	98	324.0	6.61	1.32	5.76	0	1.30	4.08	2.390	4.87	14.22	0.342475	33.9858	2.78388	0.57383
1	1	37	24.8	0	122	63	156	244	69	49.4	5.40	68	35	16.7	13.0	3.7	93.0	96	497.0	4.59	1.33	3.71	0	1.08	2.28	1.720	5.31	12.77	0.415818	21.9644	2.25989	-0.00960384
1	1	56	27.3	1	121	80	156	265	25	45	10.20	30	26	24.2	19.1	5.1	74.0	104	320.0	13.47	1.33	4.00	0	1.23	2.41	1.498	4.55	14.22	0.319972	21.3016	2.31672	0.223289
0	0	55	21.7	0	123	67	125	193	6	48.2	5.70	16	24	14	11.3	2.7	52.0	109	339.0	4.92	1.33	4.21	0	1.54	2.24	0.928	4.43	11.76	0.376701	10.9133	1.507	-0.655462
0	0	54	27.8	1	114	69	131	264	18	48.6	5.60	11	16	12.2	10.2	2.0	52.0	109	369.0	6.00	1.33	4.58	0	1.14	3.02	4.010	3.79	12.18	0.311166	48.8418	3.027	0.272509
1	1	45	25.7	0	119	79	138	209	20	47.4	5.50	11	17	13.1	11.0	2.1	79.0	109	342.0	5.12	1.33	4.76	0	1.77	2.58	1.754	3.85	14.78	0.260487	25.9241	2.54981	0.440576
0	1	66	19.9	0	102	62	130	121	50	44.4	5.40	18	50	16.9	14.5	2.4	77.0	95	334.0	5.06	1.33	4.89	0	1.12	3.36	2.221	4.00	11.84	0.337838	26.2966	2.39044	-0.0432173
1	1	32	23.6	0	100	68	163	231	13	47.8	5.70	14	18	12.4	9.9	2.5	90.0	102	351.0	4.56	1.34	3.90	0	1.01	2.63	1.133	4.59	12.75	0.36	14.4458	1.83974	-0.319328
0	1	43	26	1	163	113	145	193	34	44	5.80	24	19	24.2	18.9	5.3	72.0	114	296.0	4.80	1.34	4.57	0	1.87	2.49	0.815	4.32	12.66	0.341232	10.3179	1.4982	-0.507803
1	1	33	23.8	0	128	84	163	205	37	47.9	5.20	115	50	11.9	9.7	2.2	77.0	120	434.0	4.94	1.34	4.58	0	1.17	3.04	1.279	5.36	13.34	0.401799	17.0619	2.04031	-0.0720288
0	1	44	27.1	0	138	90	164	225	29	49.4	5.50	16	19	16.2	12.9	3.3	87.0	99	451.0	5.89	1.35	4.62	0	1.07	3.11	2.198	4.34	12.65	0.343083	27.8047	2.48897	0.135654
0	1	28	25.4	0	124	82	160	264	127	49.9	5.50	69	32	14.1	11.1	3.0	85.0	114	459.0	5.41	1.35	4.68	0	1.11	3.18	0.965	4.78	13.95	0.342652	13.4618	1.84065	-0.10084
1	1	35	26.4	0	116	75	149	222	47	48.4	6.10	19	23	16.2	13.2	3.0	78.0	117	241.0	5.74	1.35	4.92	0	1.13	3.37	1.650	4.56	13.16	0.346505	21.714	2.2708	0.0492197
0	0	59	24.4	1	149	80	116	285	45	49.4	6.50	12	27	15.6	12.4	3.2	63.0	99	312.0	6.36	1.35	5.50	0	1.45	3.65	1.472	4.52	13.07	0.34583	19.239	2.14454	-0.0588235
1	1	45	27.5	0	121	85	148	210	49	49.2	5.80	38	25	10	8.0	2.0	86.0	100	513.0	5.48	1.35	5.84	0	1.51	4.17	4.435	5.22	11.65	0.448069	51.6677	3.05645	0.176471
0	1	41	26	1	142	105	137	246	18	47.9	5.70	34	24	14.1	11.8	2.3	105.0	80	369.0	5.45	1.36	4.57	0	1.02	3.04	1.452	4.91	13.55	0.362362	19.6746	2.19542	0.062425
0	0	40	24.7	0	102	72	125	274	15	46.1	5.70	14	17	11.7	9.8	1.9	60.0	115	265.0	5.22	1.36	4.82	0	1.13	3.35	1.072	3.89	13.30	0.292481	14.2576	1.85838	-0.20048
0	1	41	29.8	0	123	72	151	190	19	48.4	5.40	19	20	23.3	19.3	4.0	88.0	99	291.0	4.97	1.36	5.03	0	1.18	3.49	3.939	4.04	11.60	0.348276	45.6924	2.93113	0.144058
1	0	54	26.9	0	113	71	134	290	40	47.7	5.90	19	21	12.7	11.0	1.7	74.0	83	229.0	5.55	1.37	5.57	0	1.50	3.78	4.633	3.59	10.72	0.334888	49.6658	2.97504	0.0372149
0	0	46	25.9	0	138	88	127	340	16	45.9	5.80	9	14	18.1	15.1	3.0	54.0	114	191.0	4.97	1.38	3.56	0	1.16	2.34	3.385	3.89	12.02	0.323627	40.6877	2.83604	0.198079
0	0	55	24.1	0	132	76	122	321	9	44.4	5.20	12	22	16	13.4	2.6	57.0	106	290.0	5.20	1.38	3.83	0	1.29	2.08	1.623	4.37	11.33	0.385702	18.3886	2.00816	-0.391357
0	0	60	23	0	116	64	123	171	49	44.3	5.60	16	26	17.1	14.3	2.8	55.0	103	300.0	4.47	1.38	4.23	0	1.52	2.43	1.122	4.17	13.98	0.298283	15.6856	1.99542	-0.0144058
0	1	58	23	0	120	77	162	184	26	45.6	6.10	28	22	14.7	12.3	2.4	110.0	67	272.0	5.13	1.38	5.61	0	1.26	3.87	4.510	4.49	14.86	0.302153	67.0186	3.50497	0.888355
0	1	41	25.5	0	93	61	159	205	29	48.9	5.70	17	23	17.8	14.2	3.6	81.0	110	329.0	5.42	1.39	3.87	0	0.84	2.58	1.059	5.06	14.28	0.354342	15.1225	1.97799	0.00840336
1	1	47	31	1	161	112	162	178	39	51.6	5.70	26	26	42.7	34.8	7.9	89.0	94	480.0	5.70	1.39	4.32	0	1.32	2.76	2.798	4.36	11.11	0.392439	31.0858	2.5232	-0.0540216
1	1	34	25.5	0	106	61	156	215	19	47.2	5.80	23	22	48.3	41.2	7.1	94.0	96	346.0	5.11	1.39	4.55	0	1.09	3.40	0.924	4.41	11.51	0.383145	10.6352	1.46905	-0.711885
1	1	60	26.3	0	121	80	157	182	65	49	5.80	21	21	17.5	14.1	3.4	95.0	79	479.0	6.91	1.39	4.90	0	1.33	3.36	2.666	4.98	13.74	0.362445	36.6308	2.82861	0.535414
0	1	53	25.6	0	137	79	137	196	51	47.7	5.70	28	23	11.3	9.5	1.8	75.0	105	271.0	5.29	1.39	5.13	0	1.06	3.58	0.959	4.35	13.03	0.333845	12.4958	1.71067	-0.336134
1	1	61	23.6	1	130	82	155	281	32	44.2	5.50	20	23	26.7	22.3	4.4	72.0	101	350.0	5.17	1.39	5.33	0	2.26	2.85	1.985	3.83	11.53	0.332177	22.887	2.2364	-0.177671
1	1	46	34.3	1	133	92	139	276	22	42.7	5.70	13	21	11.5	10.0	1.5	79.0	108	398.0	4.91	1.39	6.08	0	1.27	4.61	0.945	4.40	11.66	0.377358	11.0187	1.5117	-0.671068
0	1	57	22.8	0	106	75	154	267	131	44.7	6.30	35	26	12.2	10.4	1.8	75.0	103	166.0	5.11	1.39	6.14	0	1.29	4.48	1.694	4.92	13.37	0.367988	22.6488	2.32536	0.144058
0	1	46	23.2	0	99	67	149	156.2	183	43.1	5.70	22	23	20.3	15.5	4.8	70.0	113	422.0	5.36	1.40	3.50	0	1.16	1.95	1.111	4.62	13.72	0.336735	15.2429	1.9506	-0.0840336
0	1	57	23	0	112	74	141	158	26	47.6	5.60	16	19	18	15.3	2.7	79.0	100	369.0	5.37	1.40	6.35	0	1.50	4.34	1.517	4.79	13.20	0.362879	20.0244	2.19213	0
0	0	60	28.3	0	128	77	133	272	15	47.4	5.80	13	20	13.4	11.6	1.8	50.0	106	206.0	4.79	1.40	6.59	0	1.75	4.73	1.308	4.79	13.04	0.367331	17.0563	2.02238	-0.141657
0	1	28	25.9	0	108	65	159	235	30	48.3	5.70	29	22	13	10.2	2.8	81.0	121	343.0	5.41	1.41	3.56	0	1.13	2.06	1.331	4.69	10.46	0.448375	13.9223	1.6928	-0.631453
0	1	24	23.6	0	111	69	162	318	19	48.6	5.40	17	19	23.5	18.1	5.4	87.0	114	498.0	4.94	1.41	3.99	0	1.18	2.36	0.923	5.29	13.13	0.402894	12.119	1.68586	-0.330132
0	0	71	25.9	1	158	69	123	165	15	45.5	6.30	17	22	13.5	11.4	2.1	68.0	82	315.0	5.31	1.41	4.14	0	0.86	2.72	1.800	3.68	12.69	0.289992	22.842	2.29459	-0.00360144
0	1	44	24.8	1	139	94	167	221	29	47.5	5.40	9	21	28.9	24.1	4.8	89.0	96	383.0	4.35	1.41	4.73	0	1.22	3.17	1.263	3.77	14.14	0.26662	17.8588	2.13532	0.0936375
1	0	60	25.6	1	138	80	132	170	36	43.7	7.10	44	47	12.9	10.5	2.4	64.0	95	323.0	5.74	1.41	5.09	0	1.36	3.39	2.070	4.20	12.56	0.334395	25.9992	2.41687	0.0888355
1	1	58	26	0	127	87	140	273	19	47.1	5.90	20	23	21.2	16.0	5.2	118.0	62	431.0	4.39	1.41	5.41	0	1.00	4.00	1.260	4.12	13.66	0.301611	17.2116	2.06838	-0.0144058
0	0	39	26.5	0	109	57	119	305	113	47.7	5.50	47	36	11.4	9.8	1.6	55.0	119	209.0	5.42	1.41	5.63	0	1.95	3.67	1.573	4.62	12.36	0.373786	19.4423	2.1154	-0.17407
1	1	28	27.1	0	133	72	152	239	20	48.7	5.40	62	27	18.3	14.3	4.0	91.0	104	470.0	4.87	1.42	4.36	0	1.00	3.04	1.930	5.36	16.34	0.328029	31.5362	2.85525	0.619448
0	0	48	26.9	1	130	92	129	267	21	47	5.20	12	18	29.1	25.1	4.0	51.0	115	173.0	4.90	1.42	5.46	0	1.79	3.31	1.158	4.22	12.51	0.33733	14.4866	1.82929	-0.364946
1	1	59	24.3	0	129	88	155	225	44	48.8	6.40	27	23	22.1	18.5	3.6	94.0	81	398.0	6.76	1.43	4.99	0	0.92	3.80	1.797	5.10	14.50	0.351724	26.0565	2.53637	0.410564
0	1	33	26.5	1	135	97	182	139	33	49.8	5.00	18	27	27.1	22.3	4.8	77.0	120	240.0	5.50	1.43	5.32	0	1.35	3.63	2.041	5.08	14.32	0.354749	29.2271	2.63948	0.4994
1	1	53	23.2	0	138	66	157	111	46	47.9	5.20	37	41	28.5	23.6	4.9	72.0	107	322.0	5.20	1.43	5.89	0	1.96	3.84	0.839	4.94	12.86	0.384137	10.7895	1.55413	-0.445378
0	1	42	24.6	0	122	77	165	239	17	46.8	5.30	14	22	40.1	33.8	6.3	94.0	91	343.0	4.75	1.43	6.24	0	1.30	4.55	1.066	4.90	15.14	0.323646	16.1392	2.10024	0.132053
1	0	57	25.2	0	109	61	126	231	23	48.6	6.00	28	29	18.3	14.7	3.6	59.0	103	228.0	4.51	1.44	4.38	0	1.04	2.99	2.695	4.16	13.13	0.316832	35.3854	2.75738	0.388956
0	0	57	28	0	123	71	136	281	18	46.8	5.60	25	29	19.2	16.8	2.4	74.0	82	316.0	5.25	1.44	6.67	0	1.73	4.65	4.805	4.07	11.56	0.352076	55.5458	3.12448	0.165666
0	1	50	19.7	0	115	60	162	209	43	48.7	5.70	22	26	19.8	16.8	3.0	90.0	91	338.0	5.40	1.45	5.06	0	1.25	3.15	1.858	4.52	12.02	0.37604	22.3332	2.23619	-0.141657
0	1	50	29.1	0	129	82	162	193	24	48.8	5.30	28	30	24.9	20.0	4.9	80.0	104	358.0	5.38	1.46	4.71	0	1.07	3.21	1.255	4.62	14.10	0.32766	17.6955	2.12359	0.0828331
0	1	51	23.7	0	102	64	151	207	22	46.8	5.70	20	20	15.4	12.8	2.6	88.0	93	306.0	5.28	1.46	4.80	0	0.89	3.41	0.973	3.60	14.91	0.241449	14.5074	1.97802	0.0552221
1	1	59	26.5	0	130	79	151	203	77	46.7	5.70	45	27	17.8	15.4	2.4	71.0	103	407.0	5.55	1.46	6.31	0	1.61	4.43	1.176	4.66	11.97	0.389307	14.0767	1.77208	-0.490996
1	1	67	28.1	1	128	66	136	234	32	47.8	6.20	32	21	10.3	8.0	2.3	80.0	92	365.0	6.85	1.47	3.12	0	1.05	1.54	0.749	4.56	13.41	0.340045	10.0441	1.51463	-0.32413
0	1	73	25.1	1	166	82	138	228	20	48.1	5.70	23	36	19.3	15.5	3.8	136.0	47	388.0	6.81	1.47	4.47	0	1.62	2.42	1.876	4.04	15.69	0.257489	29.4344	2.73945	0.57503
1	1	29	30.4	0	115	69	150	215	63	44.3	5.50	49	29	19.3	15.3	4.0	76.0	124	371.0	4.93	1.47	4.67	0	1.13	3.32	0.825	4.66	13.44	0.346726	11.088	1.61531	-0.289316
0	0	45	23.5	0	115	68	139	277	48	46.4	5.40	30	25	15.7	13.4	2.3	48.0	120	210.0	5.20	1.47	4.86	0	1.54	2.98	0.987	4.78	14.08	0.339489	13.897	1.88067	-0.060024
1	1	59	27	0	118	70	150	155	107	51.1	5.50	29	30	23.8	19.9	3.9	80.0	98	205.0	5.64	1.47	4.93	0	1.45	3.39	0.980	4.26	11.00	0.387273	10.78	1.4593	-0.773109
1	1	25	27.9	0	109	60	172	276	36	47.8	5.40	22	30	18	14.6	3.4	83.0	120	386.0	4.28	1.47	5.28	0	1.26	3.75	2.186	4.82	13.82	0.34877	30.2105	2.64086	0.440576
0	1	48	23.3	0	101	67	135	234	26	49.9	5.40	21	22	27.4	22.8	4.6	91.0	90	413.0	4.99	1.47	5.70	0	1.41	4.02	1.985	4.40	14.48	0.303867	28.7428	2.63318	0.504202
0	1	72	23	1	167	88	137	223	25	46.2	5.70	34	33	29.4	25.4	4.0	96.0	72	535.0	5.32	1.47	5.71	0	1.57	3.68	2.090	4.43	11.33	0.390997	23.6797	2.26105	-0.183673
1	1	43	26.6	0	120	81	150	203	82	44.2	6.60	44	35	14.4	11.6	2.8	79.0	110	444.0	5.88	1.48	5.00	0	1.13	3.43	1.071	4.71	14.34	0.328452	15.3581	1.99732	0.0228091
0	0	52	21.2	0	96	61	118	190	71	46.5	5.60	38	46	24.3	20.0	4.3	51.0	111	141.0	4.77	1.48	5.70	0	1.60	3.78	0.687	4.49	12.46	0.360353	8.56002	1.30045	-0.591837
1	0	60	26.3	0	135	82	132	239	74	46.6	5.50	22	19	20.1	17.3	2.8	72.0	83	362.0	4.95	1.48	5.85	0	1.36	4.20	3.552	4.92	13.99	0.35168	49.6925	3.14917	0.708283
1	1	46	28.2	1	114	84	149	297	17	47.6	5.80	14	22	13	10.4	2.6	74.0	111	376.0	5.91	1.49	3.89	0	1.06	2.46	1.126	4.03	11.04	0.365036	12.431	1.60355	-0.690276
1	0	42	23.4	0	102	57	93	335	38	48.7	5.70	9	21	14.6	12.1	2.5	51.0	120	211.0	5.46	1.49	3.97	0	1.07	2.56	1.405	4.25	14.01	0.303355	19.684	2.22438	0.14886
0	1	22	24.8	0	121	78	167	293	26	53.9	5.50	33	24	23.6	19.6	4.0	91.0	109	390.0	4.70	1.49	4.38	0	1.45	2.45	3.414	4.99	14.85	0.336027	50.6979	3.22521	0.830732
0	0	46	24.5	1	149	89	139.6	180.4	19	46	5.30	37	29	23.4	19.9	3.5	66.0	101	301.0	4.95	1.49	4.72	0	1.39	2.90	1.553	4.38	12.06	0.363184	18.7292	2.06226	-0.266507
0	0	83	23.7	0	112	73	131	216	23	40.3	13.50	10	15	17.1	14.0	3.1	45.0	94	233.0	21.37	1.49	5.00	0	1.22	3.22	1.334	3.77	13.28	0.283886	17.7155	2.07434	-0.062425
1	1	27	25	0	107	85	138	450	33	49.5	5.70	29	22	14.8	12.9	1.9	78.0	124	468.0	4.82	1.49	5.18	0	1.46	3.43	0.951	5.11	16.46	0.31045	15.6535	2.16363	0.12605
1	0	61	23.4	0	138	81	135	232	18	49.1	5.50	15	18	14.2	12.0	2.2	52.0	104	230.0	5.92	1.49	5.70	0	1.61	3.66	0.843	4.27	11.55	0.369697	9.73665	1.38269	-0.746699
1	1	60	23.7	0	111	67	147	175	21	45.6	5.50	11	17	20.8	16.8	4.0	92.0	83	501.0	5.21	1.50	4.34	0	1.02	2.85	1.466	4.98	14.67	0.339468	21.5062	2.35565	0.27611
0	0	42	26.2	0	131	84	137	220	18	49.8	5.30	40	23	20.5	17.8	2.7	62.0	112	267.0	4.80	1.50	5.55	0	1.45	3.45	3.397	3.50	10.04	0.348606	34.1059	2.57327	-0.0540216
1	1	57	23.4	0	123	76	139	155	19	44.6	9.20	20	20	11.1	9.4	1.7	66.0	108	245.0	9.96	1.50	5.87	0	1.33	4.25	2.582	3.64	10.92	0.333333	28.1954	2.4173	-0.117647
1	0	67	33.9	0	139	78	130	276	20	45	6.50	42	39	19.2	16.4	2.8	45.0	105	256.0	6.55	1.50	6.54	0	1.43	4.79	3.507	4.89	13.02	0.375576	45.6611	3.00595	0.459784
1	1	54	23.6	0	130	83	153	223	19	45.7	5.50	24	25	24.5	19.8	4.7	77.0	103	339.0	5.85	1.51	4.45	0	0.98	3.13	0.678	5.39	15.25	0.353443	10.3395	1.66252	-0.0192077
1	1	50	31.3	0	118	80	154	192	48	49.4	5.50	45	32	18.3	15.2	3.1	86.0	96	431.0	5.10	1.51	4.59	0	1.18	2.87	0.626	5.15	11.36	0.453345	7.11136	1.05952	-0.842737
0	0	54	22.2	0	117	78	140	232	12	47.4	5.90	12	18	19.1	15.9	3.2	60.0	104	277.0	6.33	1.51	5.37	0	1.56	3.22	1.674	4.47	15.08	0.296419	25.2439	2.54348	0.434574
1	1	33	35.3	0	107	61	147	263	32	47.8	5.30	85	56	21.8	17.5	4.3	75.0	121	319.0	4.81	1.52	4.42	0	0.96	3.13	1.284	4.85	11.73	0.41347	15.0613	1.82767	-0.476591
0	0	51	28	1	137	93	119	147	9	43.1	5.50	10	17	15.8	13.3	2.5	96.0	62	344.0	5.13	1.52	5.18	0	1.59	3.24	1.515	4.11	13.81	0.29761	20.9221	2.27286	0.147659
1	0	31	28.1	0	110	62	128	178	18	43.2	6.10	17	12	12.5	10.5	2.0	59.0	123	304.0	5.00	1.52	5.62	0	1.45	3.86	0.412	3.23	10.66	0.303002	4.39192	0.547038	-0.955582
0	1	49	21.3	1	143	93	161	203	17	48.5	5.80	13	14	21.5	18.3	3.2	84.0	100	313.0	5.51	1.53	5.66	0	1.74	3.73	1.361	4.56	13.00	0.350769	17.693	2.05672	-0.128451
1	1	69	28.4	1	146	85	151	212	33	45.3	6.40	19	23	9.3	8.1	1.2	100.0	70	203.0	5.72	1.53	5.74	0	1.13	4.32	1.678	4.25	12.00	0.354167	20.136	2.1316	-0.230492
0	0	40	23.1	0	110	65	126	166	12	47	5.50	13	19	17.8	14.3	3.5	62.0	114	169.0	4.43	1.54	4.07	0	1.30	2.39	2.971	3.87	11.11	0.348335	33.0078	2.58319	-0.0228091
0	1	64	26.4	0	101	63	141	272	89	48.6	6.30	16	18	18.5	15.2	3.3	73.0	99	253.0	6.01	1.54	4.54	0	1.46	2.70	1.945	4.16	11.64	0.357388	22.6398	2.23084	-0.168067
0	0	53	22.4	0	123	77	117	171	14	46.9	5.40	10	16	25.3	21.2	4.1	61.0	105	285.0	4.78	1.55	4.84	0	1.34	3.08	2.561	4.24	12.10	0.350413	30.9881	2.56785	0.0972389
1	1	47	28.1	0	122	83	160	113	34	44.9	5.60	36	25	26.8	22.6	4.2	86.0	98	333.0	5.61	1.55	5.19	0	1.26	3.64	2.352	5.27	12.86	0.409798	30.2467	2.58494	0.234094
0	0	62	23.1	1	145	89	145	295	33	46.5	5.40	19	18	18	15.0	3.0	47.0	106	212.0	5.58	1.55	6.54	0	2.11	4.39	0.758	5.38	12.69	0.423956	9.61902	1.42973	-0.517407
1	1	57	29.5	1	130	81	146	193	42	44.1	5.60	23	23	11.8	9.7	2.1	87.0	90	292.0	5.05	1.56	3.60	0	1.19	2.03	0.454	4.43	11.81	0.375106	5.36174	0.798787	-0.773109
0	0	44	22.9	0	105	67	141	175	17	50.7	5.40	18	26	22.5	18.6	3.9	74.0	89	281.0	4.82	1.56	4.56	0	1.42	2.99	1.690	4.30	13.19	0.326005	22.2911	2.29878	0.0768307
0	0	54	23.8	0	110	60	118	224	13	48.5	5.80	15	20	16.5	14.7	1.8	63.0	103	283.0	4.82	1.56	5.14	0	1.20	3.30	2.276	4.09	12.76	0.320533	29.0418	2.53864	0.187275
0	1	41	27.3	0	119	66	153	220	79	46.8	5.40	40	29	24	18.9	5.1	75.0	115	336.0	5.14	1.57	3.86	0	1.35	2.24	1.563	5.27	14.16	0.372175	22.1321	2.35113	0.259304
1	1	27	22.9	0	118	64	155	259	32	53.1	5.20	17	21	16.2	13.1	3.1	85.0	115	399.0	5.35	1.57	5.06	0	1.12	3.50	1.811	4.49	13.53	0.331855	24.5028	2.41366	0.232893
0	0	46	23.6	0	111	70	133	281	21	46.4	5.70	13	18	10.2	8.5	1.7	68.0	97	378.0	6.16	1.58	4.30	0	1.29	2.51	3.160	4.08	10.84	0.376384	34.2544	2.60855	-0.0372149
1	0	45	24.8	0	132	78	91	148	12	48.9	5.50	19	21	9	7.5	1.5	77.0	84	330.0	5.06	1.58	5.02	0	1.29	3.21	1.396	3.78	12.13	0.311624	16.9335	1.9651	-0.332533
1	1	41	23.1	0	126	78	146.3	189	39	53.5	7.40	20	18	18.6	14.2	4.4	81.0	109	439.0	7.73	1.59	3.72	0	1.21	2.07	2.438	5.22	14.91	0.350101	36.3506	2.89657	0.690276
0	0	53	23.2	0	136	64	132	132	18	50.4	6.00	15	22	19	15.8	3.2	56.0	107	301.0	5.54	1.59	5.33	0	1.82	3.15	2.236	4.32	12.14	0.355848	27.145	2.43752	0.0168067
0	0	55	24.3	0	125	81	139	394	14	46.8	5.70	9	17	18.1	15.6	2.5	63.0	101	232.0	4.99	1.59	5.64	0	1.48	3.60	1.462	4.30	11.81	0.364098	17.2662	1.96825	-0.373349
1	0	60	32.3	1	160	87	144	163	24	47.8	5.40	14	19	33.6	26.0	7.6	76.0	77	256.0	4.32	1.60	3.33	0	1.17	1.70	3.285	4.55	15.09	0.301524	49.5707	3.21897	0.85114
1	1	73	28.3	1	136	80	156	147	60	47	6.00	24	24	15.8	12.8	3.0	98.0	70	308.0	5.32	1.60	4.23	0	1.01	2.79	3.464	3.96	12.27	0.322738	42.5033	2.89274	0.259304
0	0	60	22.8	0	122	72	133	260	26	49.3	5.90	19	23	14.6	12.5	2.1	57.0	102	248.0	5.51	1.60	4.37	0	1.23	2.95	3.958	3.85	10.47	0.367717	41.4403	2.78395	0
1	1	44	25.2	0	126	85	154	217	99	48.2	5.20	29	28	16.3	12.5	3.8	73.0	113	354.0	4.94	1.60	4.47	0	1.19	2.97	0.919	4.10	11.99	0.341952	11.0188	1.52819	-0.620648
1	0	40	31.7	0	118	80	127	310	22	44.1	6.00	15	14	9.2	7.8	1.4	39.0	132	311.0	5.40	1.61	4.61	0	0.92	3.14	2.533	4.26	10.00	0.426	25.33	2.2744	-0.180072
1	0	72	27.5	1	147	66	121	212	20	45.9	6.10	15	23	21.3	17.5	3.8	73.0	75	274.0	5.37	1.62	3.65	0	1.42	1.93	1.451	4.20	12.43	0.337892	18.0359	2.04409	-0.240096
0	0	51	26.7	0	115	75	130	179	9	45	5.40	11	18	15	13.0	2.0	65.0	100	282.0	4.82	1.62	3.96	0	1.16	1.93	2.161	4.30	11.63	0.369733	25.1324	2.33481	-0.108043
0	0	60	21.9	0	111	74	133	159	17	49.1	5.70	17	26	21.4	19.0	2.4	79.0	74	315.0	4.66	1.62	6.83	0	2.19	4.30	2.685	4.08	11.01	0.370572	29.5618	2.46853	-0.0828331
1	1	33	25	0	135	88	166	184	39	46.9	5.40	31	32	16.4	11.8	4.6	73.0	122	485.0	5.29	1.63	2.72	0	0.83	1.50	0.735	5.18	13.76	0.376453	10.1136	1.54284	-0.248499
1	1	25	34.9	0	119	78	152	228	28	49.1	5.50	40	33	29.4	23.0	6.4	83.0	120	543.0	4.63	1.63	3.51	0	0.97	2.25	1.521	4.63	12.16	0.380757	18.4954	2.05489	-0.270108
1	1	37	27	0	109	72	158	155	53	47.6	5.50	28	28	27.1	21.8	5.3	77.0	117	659.0	4.75	1.63	4.87	0	1.32	2.97	1.517	5.58	11.49	0.48564	17.4303	1.96214	-0.416567
1	0	54	27.1	0	115	72	137	245	111	49.4	6.50	47	35	11.7	9.7	2.0	58.0	105	192.0	6.00	1.63	5.43	0	1.39	3.57	1.264	4.15	11.62	0.357143	14.6877	1.79717	-0.518607
1	0	60	32.1	0	134	78	138.5	235.8	27	48.9	5.80	14	17	14.5	11.9	2.6	78.0	75	317.0	5.48	1.63	5.63	0	1.33	3.76	4.486	4.35	12.16	0.35773	54.5498	3.13648	0.284514
0	0	60	25.2	0	106	65	129	215	11	46.7	5.80	11	19	12	10.2	1.8	77.0	76	363.0	5.03	1.63	6.39	0	1.60	4.40	0.983	4.21	12.73	0.330715	12.5136	1.69504	-0.405762
0	1	39	24.5	0	119	79	164	175	30	50.2	5.40	14	16	17.7	14.2	3.5	87.0	102	481.0	4.80	1.64	4.05	0	0.94	2.62	1.840	4.36	12.19	0.35767	22.4296	2.24932	-0.112845
0	1	29	24.8	0	135	66	158	282	67	49.1	5.40	38	27	17.7	13.9	3.8	92.0	103	292.0	5.29	1.64	4.31	0	1.02	2.82	1.063	5.24	14.07	0.372424	14.9564	1.95351	-0.0252101
0	0	62	22.1	1	147	87	130	160	9	50.6	5.50	14	21	28.3	23.8	4.5	63.0	97	234.0	5.26	1.64	4.55	0	1.65	2.35	2.120	4.34	16.66	0.260504	35.3192	2.99219	0.685474
0	0	52	24.7	0	112	61	137	270	103	46.1	5.40	54	40	17.5	14.3	3.2	55.0	108	288.0	4.77	1.65	5.19	0	1.47	3.34	2.670	4.87	13.42	0.362891	35.8314	2.78707	0.465786
0	1	69	23.1	1	148	74	160	284	100	46.4	5.90	19	18	18.9	16.3	2.6	85.0	85	385.0	5.19	1.65	5.58	0	1.31	3.80	2.674	4.45	14.83	0.300067	39.6554	2.97821	0.731092
0	1	55	24.6	1	145	85	160	181	69	48.6	5.80	17	24	24.8	21.2	3.6	86.0	92	498.0	5.58	1.65	6.28	0	1.06	5.07	2.683	3.86	14.99	0.257505	40.2182	3.00309	0.755102
1	1	39	28.5	0	114	74	159	151	21	45.8	5.70	55	46	28.3	24.0	4.3	76.0	115	327.0	5.69	1.66	4.38	0	0.84	3.17	1.210	4.44	12.32	0.36039	14.9072	1.84766	-0.388956
1	0	69	27.6	0	128	65	128	145	100	43.7	5.40	27	24	21.2	17.7	3.5	54.0	97	248.0	5.42	1.66	4.59	0	1.75	2.57	1.331	4.61	13.82	0.333575	18.3944	2.14472	0.0660264
0	1	39	23.6	0	111	76	153	157	34	47.7	5.40	21	22	19.6	16.9	2.7	80.0	113	308.0	5.57	1.66	5.89	0	1.30	4.23	2.440	4.18	12.03	0.347465	29.3532	2.51003	0.0540216
0	1	28	23.3	0	121	76	159	175	37	50	5.90	37	28	17.8	14.5	3.3	80.0	122	411.0	4.91	1.66	6.42	0	1.70	4.36	1.200	5.41	11.98	0.451586	14.376	1.79363	-0.478992
0	0	19	22.9	0	96	56	124	388	19	47.1	5.20	14	23	12.5	10.1	2.4	72.0	110	266.0	5.10	1.67	3.34	0	0.81	2.03	2.651	4.98	11.94	0.417085	31.6529	2.58087	0.0816327
0	0	49	21.7	0	127	83	135	245	16	46	5.40	14	20	16	13.2	2.8	55.0	111	324.0	4.92	1.67	3.76	0	1.38	2.00	1.938	4.11	11.24	0.365658	21.7831	2.17344	-0.244898
1	0	56	19.9	0	136	87	135	297	13	49.6	5.90	17	20	15.4	12.8	2.6	54.0	107	278.0	5.12	1.67	4.17	0	1.34	2.39	2.002	4.81	12.88	0.373447	25.7858	2.42651	0.145258
0	0	56	23.4	0	133	69	139	127	9	44.5	5.80	13	19	18.3	16.1	2.2	72.0	85	253.0	5.51	1.67	4.82	0	1.51	2.78	1.673	4.24	15.00	0.282667	25.095	2.53212	0.42377
0	0	50	23	0	96	51	131	150	32	45.4	5.60	14	24	30.3	26.0	4.3	51.0	113	231.0	5.10	1.67	4.88	0	1.35	3.03	2.689	4.37	13.29	0.328819	35.7368	2.77667	0.436975
0	1	34	22	0	117	65	161	210	30	47.5	5.10	28	27	15.5	13.0	2.5	90.0	101	461.0	4.51	1.67	5.20	0	1.30	3.52	1.159	4.48	11.62	0.385542	13.4676	1.71045	-0.57503
0	0	56	23	0	122	69	140	212	13	47.7	5.70	9	21	18.9	15.9	3.0	55.0	105	239.0	5.44	1.67	5.30	0	1.48	3.27	1.539	4.70	13.99	0.335954	21.5306	2.31279	0.216086
1	1	49	26.5	1	145	93	155	161	19	47.7	5.30	94	43	32.4	27.8	4.6	86.0	96	361.0	5.01	1.67	5.57	0	1.05	3.99	2.100	4.46	12.90	0.345736	27.09	2.47699	0.177671
0	0	52	27.8	1	145	96	132	257	13	45.4	5.30	15	21	18.5	15.6	2.9	60.0	106	222.0	4.46	1.68	5.08	0	1.45	3.18	3.634	3.48	10.64	0.327068	38.6658	2.72141	-0.0120048
0	1	27	25.7	0	112	60	142	224	23	49.5	5.60	38	24	14.2	11.5	2.7	78.0	124	412.0	5.45	1.69	3.74	0	1.11	2.08	2.258	4.42	14.33	0.308444	32.3571	2.74186	0.554622
0	0	45	20.3	0	112	68	142	228	29	46.5	6.90	15	18	19.2	16.4	2.8	58.0	112	246.0	7.69	1.69	5.02	0	1.13	3.59	1.227	4.02	14.35	0.280139	17.6075	2.13465	0.106843
1	0	50	28.3	1	152	88	150	284	71	51.5	5.80	18	49	15.8	13.1	2.7	67.0	96	293.0	4.95	1.69	5.27	0	1.19	3.69	3.812	4.53	12.71	0.356412	48.4505	3.04765	0.39976
1	1	58	27.2	1	153	94	151	266	57	48.8	5.30	16	24	55.5	49.0	6.5	66.0	107	298.0	5.86	1.69	6.42	0	1.73	4.49	0.927	5.27	13.52	0.389793	12.533	1.74264	-0.214886
0	1	21	23.4	0	104	61	160	258	23	49	5.30	25	22	10.6	8.5	2.1	98.0	101	370.0	5.09	1.70	4.28	0	0.94	2.78	3.697	5.65	13.22	0.427383	48.8743	3.08561	0.529412
1	1	46	22	0	123	74	167	261	33	46	5.40	26	22	31.4	26.5	4.9	81.0	106	284.0	4.76	1.70	4.47	0	1.07	3.04	0.860	4.32	14.04	0.307692	12.0744	1.73756	-0.135654
1	1	50	24.5	1	142	90	150	232	49	44.60	6.20	27	30	18.2	14.7	3.5	70.0	110	410.0	6.55	1.70	5.30	0	1.20	3.83	2.059	4.69	11.93	0.393127	24.5639	2.32681	-0.0684274
0	1	50	18.7	0	98	64	145	217	18	47.5	5.80	22	23	16.9	15.0	1.9	83.0	100	366.0	4.71	1.70	8.12	0	1.18	6.52	0.876	4.25	13.33	0.31883	11.6771	1.6605	-0.286915
0	1	41	23.2	0	123	72	156	256	93	49.1	5.50	27	23	24.9	20.8	4.1	77.0	113	379.0	5.07	1.71	4.48	0	1.13	3.02	1.548	3.91	12.33	0.317113	19.0868	2.09535	-0.201681
1	1	20	23.5	0	128	67	159	347	38.72	47.13	5.40	47	23	19.22	15.95	3.314	85.0	120	355.0	5.11	1.71	4.67	0	1.17	3.19	1.129	4.20	13.42	0.312966	15.1512	1.92632	-0.139256
1	1	31	28.6	0	132	69	135	298	45	48.9	5.60	25	28	16.5	14.0	2.5	93.0	99	451.0	5.35	1.71	4.98	0	1.62	3.14	1.732	4.59	11.68	0.392979	20.2298	2.12024	-0.260504
1	1	67	25.7	1	166	83	158	216	27	45.8	6.00	11	15	17.5	14.9	2.6	61.0	104	302.0	5.68	1.71	5.93	0	1.40	4.22	3.062	3.92	12.24	0.320261	37.4789	2.76535	0.208884
1	1	41	30	0	105	71	154	239	41	46	5.10	59	33	17.2	14.0	3.2	97.0	88	375.0	5.08	1.72	4.08	0	0.71	2.96	1.535	4.19	13.19	0.317665	20.2466	2.20259	0.0120048
0	0	53	26.5	0	100	74	141	278	28	46.7	5.80	16	19	20.5	18.2	2.3	63.0	103	299.0	5.44	1.72	6.87	0	1.41	5.10	0.783	4.19	15.80	0.26519	12.3714	1.88048	0.0396158
1	1	49	25.7	1	144	101	162	101	28	51.1	5.40	21	21	40.3	32.6	7.7	83.0	100	432.0	5.49	1.73	4.16	0	1.09	2.53	1.717	4.79	13.19	0.363154	22.6472	2.31463	0.0984394
0	1	25	23.6	0	137	79	150	229	21	52	5.40	23	20	15.1	13.2	1.9	95.0	101	412.0	4.83	1.73	6.71	0	1.42	4.97	1.091	5.13	11.87	0.432182	12.9502	1.68361	-0.552221
1	1	34	26.3	0	104	74	160	224	26	49.2	6.00	44	28	17.1	13.6	3.5	82.0	114	348.0	5.57	1.74	3.55	0	0.84	2.23	2.274	4.80	13.24	0.362538	30.1078	2.60232	0.314526
1	1	54	25.7	0	105	64	157	170	24	43.5	5.60	24	21	26.3	21.8	4.5	85.0	95	207.0	4.97	1.74	4.46	0	1.38	2.57	1.030	4.61	12.13	0.380049	12.4939	1.66104	-0.537815
1	1	50	29.9	1	133	82	153	128	20	52.3	5.40	37	27	17	13.2	3.8	104.0	76	247.0	5.48	1.75	4.00	0	1.07	2.38	1.667	4.14	13.76	0.300872	22.9379	2.36175	0.210084
1	0	58	24.8	0	106	63	144	243	28	50.8	5.90	42	26	25.6	20.4	5.2	56.0	104	250.0	5.39	1.75	4.08	0	1.19	2.18	0.888	4.21	12.67	0.332281	11.251	1.58533	-0.465786
1	1	49	24.3	0	127	86	155	186	43	49.9	5.50	39	28	20.4	16.4	4.0	88.0	94	332.0	5.60	1.75	4.65	0	1.32	3.00	1.337	4.02	14.40	0.279167	19.2528	2.22723	0.183673
1	1	61	23.3	1	124	81	146	234	289	48.6	6.60	59	48	39.5	33.4	6.1	68.0	104	325.0	7.07	1.75	5.27	0	1.47	3.50	0.928	4.98	14.72	0.338315	13.6602	1.90512	0.0120048
1	1	71	29.9	1	128	72	169	146	59	44	9.20	31	28	16.9	13.9	3.0	68.0	97	301.0	11.13	1.75	5.48	0	1.39	3.66	1.082	3.71	12.26	0.30261	13.2653	1.72778	-0.477791
1	0	41	23.3	1	141	87	148	235	48	44.5	5.40	9	24	7.7	6.5	1.2	54.0	118	238.0	4.80	1.76	4.01	0	1.10	2.47	0.922	4.36	13.15	0.331559	12.1243	1.68746	-0.32533
0	0	34	23.5	1	131	94	110	206	11	49.2	5.50	17	24	14.2	12.5	1.7	58.0	121	193.0	5.04	1.76	4.19	0	1.30	2.22	4.697	4.10	10.45	0.392344	49.0836	2.95245	0.0168067
0	0	46	25	0	125	64	135	248	12	49.2	5.60	15	19	19.1	16.1	3.0	54.0	114	252.0	5.07	1.76	4.65	0	1.30	2.86	2.114	4.31	12.13	0.355317	25.6428	2.38007	-0.0144058
1	0	46	25.8	0	138	80	138	250	46	46.9	6.20	17	20	23	19.8	3.2	61.0	110	277.0	6.52	1.76	4.68	0	1.41	3.11	3.964	4.12	12.19	0.337982	48.3212	3.01681	0.273709
1	0	62	25.6	1	159	98	144	256	38	49.1	5.70	18	25	14.9	12.6	2.3	66.0	91	352.0	5.34	1.76	4.92	0	1.14	3.42	4.649	4.06	11.20	0.3625	52.0688	3.04305	0.0948379
0	1	34	22.2	0	102	56	152	194	25	51.3	5.50	19	19	36.3	30.8	5.5	84.0	110	339.0	4.57	1.76	5.35	0	1.13	3.79	0.792	5.34	13.10	0.407634	10.3752	1.52876	-0.393758
1	0	36	38.4	0	115	75	104	294	21	45.4	5.50	24	20	10.7	9.3	1.4	60.0	119	239.0	4.77	1.76	6.16	0	1.73	3.98	1.249	3.74	11.56	0.323529	14.4384	1.77716	-0.540216
0	0	66	22.9	0	123	68	140.5	238.4	27	46.8	5.60	22	25	16.1	14.0	2.1	57.0	97	260.0	5.27	1.77	5.77	0	1.63	3.50	1.403	3.55	12.36	0.287217	17.3411	2.00103	-0.266507
1	1	40	29.2	1	157	90	154	327	176	46.1	5.70	30	32	16	12.9	3.1	92.0	94	538.0	5.12	1.78	5.43	0	1.40	3.66	1.132	4.33	15.38	0.281534	17.4102	2.1926	0.187275
0	0	62	24.4	0	137	75	132	185	20	45.3	5.70	14	25	18.7	16.3	2.4	63.0	96	299.0	4.99	1.78	5.96	0	1.89	3.54	2.142	4.01	12.31	0.325751	26.368	2.41743	0.0348139
0	1	54	27.1	0	133	80	159	280	16	46.1	5.90	13	17	25.4	20.3	5.1	72.0	106	360.0	5.40	1.79	3.09	0	0.78	1.60	0.720	5.41	15.64	0.345908	11.2608	1.77508	0.0060024
1	1	41	26.7	1	146	94	146	230	27	48.6	5.60	12	19	17.5	14.0	3.5	88.0	99	430.0	5.89	1.79	4.00	0	1.36	1.95	1.803	4.46	13.44	0.331845	24.2323	2.39713	0.207683
1	0	59	21	1	152	78	117	281	21	46.6	7.00	15	16	17.8	14.9	2.9	63.0	99	210.0	7.62	1.79	4.95	0	1.25	3.35	3.181	3.97	12.73	0.311862	40.4941	2.86938	0.351741
1	0	52	21.9	1	140	78	134	223	27	49.3	6.10	21	28	14.9	12.4	2.5	53.0	110	324.0	5.91	1.79	5.09	0	1.20	3.31	3.795	5.45	12.61	0.432197	47.855	3.02973	0.373349
1	0	54	27.1	0	119	71	134	252	51	46.6	5.70	46	32	20.6	17.9	2.7	56.0	107	268.0	6.03	1.79	5.49	0	1.34	3.65	1.486	4.51	14.63	0.308271	21.7402	2.36382	0.279712
1	1	43	22.8	0	118	86	153	155	2	47.3	5.50	14	31	31	24.6	6.4	78.0	111	462.0	4.20	1.80	3.69	0	0.99	2.13	1.026	4.55	12.62	0.360539	12.9481	1.72306	-0.411765
1	1	30	29	0	133	79	155	305	75	50.6	5.60	42	20	11.3	9.3	2.0	84.0	114	413.0	4.84	1.80	6.38	0	1.20	4.70	1.670	5.17	14.07	0.367448	23.4969	2.40524	0.282113
0	0	40	24.6	1	137	93	148	321	16	46.6	5.40	10	20	21.9	19.6	2.3	66.0	106	276.0	5.52	1.80	7.22	0	2.02	4.96	2.413	4.47	13.11	0.340961	31.6344	2.64417	0.312125
0	1	54	29.7	1	100	62	172	221	22	48.6	5.70	14	21	31.2	25.4	5.8	79.0	102	417.0	4.79	1.81	4.14	0	1.21	2.70	1.231	4.32	15.26	0.283093	18.7851	2.2603	0.226891
0	0	33	24.9	0	109	71	119	304	50	46.2	5.00	26	19	12.4	10.9	1.5	47.0	131	289.0	4.98	1.82	4.82	0	1.17	3.04	1.238	4.78	11.19	0.427167	13.8532	1.71855	-0.615846
1	0	39	31.3	1	142	90	128	285	53	46.6	5.90	24	22	15.4	13.1	2.3	66.0	106	259.0	6.20	1.83	4.76	0	0.93	3.19	1.525	4.14	11.93	0.347024	18.1932	2.02658	-0.313325
0	0	35	23.5	0	94	63	138.4	243	17	49.9	5.70	14	18	10.3	9.2	1.1	56.0	122	327.0	5.37	1.84	4.96	0	1.26	3.21	1.966	3.90	13.37	0.291698	26.2854	2.47427	0.27491
1	1	38	29	1	141	71	145	177	14	46.8	5.50	19	22	17.1	14.3	2.8	100.0	86	431.0	4.92	1.85	4.47	0	1.16	3.06	1.875	3.97	12.69	0.312845	23.7937	2.33541	0.0372149
0	0	55	23	0	104	61	143	248	57	46.5	5.40	31	28	31.1	25.8	5.3	53.0	108	252.0	5.10	1.85	5.40	0	1.29	3.65	3.653	4.20	12.49	0.336269	45.626	2.97545	0.332533
1	1	51	27.2	1	112	63	161	213	23	45.8	5.40	20	21	15.6	13.2	2.4	78.0	104	320.0	4.79	1.85	5.46	0	1.17	3.90	0.865	4.86	13.02	0.373272	11.2623	1.60616	-0.394958
1	1	45	26.3	0	118	73	169.3	258.9	24	46.1	6.00	28	25	8.6	7.4	1.2	81.0	107	358.0	4.76	1.85	5.83	0	1.14	4.11	3.271	5.07	13.29	0.38149	43.4716	2.9726	0.516206
0	0	50	22.5	0	112	75	132	192	16	47.9	5.80	13	19	16	13.5	2.5	59.0	108	263.0	4.87	1.86	5.24	0	1.62	3.44	1.418	4.73	12.49	0.378703	17.7108	2.02915	-0.232893
1	0	66	29.8	0	127	74	144	259	46	46.5	6.00	11	22	13.7	11.6	2.1	72.0	79	257.0	6.10	1.86	6.29	0	1.58	4.11	1.278	4.31	11.82	0.364636	15.106	1.83509	-0.457383
0	1	60	24.9	0	130	85	144	216	36	44.4	5.60	15	20	20.6	15.9	4.7	66.0	105	351.0	6.13	1.87	3.88	0	0.97	2.27	1.407	5.11	13.53	0.377679	19.0367	2.16124	0.0408163
1	1	57	28.1	1	143	82	168	114	81	50.8	8.80	73	46	17.2	13.2	4.0	75.0	102	280.0	10.03	1.87	5.01	0	0.94	3.46	0.906	4.44	13.24	0.335347	11.9954	1.68206	-0.304922
0	1	57	25.3	0	118	78	160	264	64	47.2	5.40	29	24	41.9	35.7	6.2	72.0	104	404.0	5.17	1.87	5.75	0	1.20	4.04	1.638	5.03	13.57	0.370671	22.2277	2.31864	0.158463
1	0	49	23.4	0	138	80	129	199	14	47.7	5.40	12	18	26.9	22.0	4.9	53.0	113	199.0	5.10	1.88	4.11	0	0.95	2.68	1.722	3.53	12.94	0.272798	22.2827	2.28392	0.0312125
0	1	58	22.2	0	126	57	151	185	22	46.8	6.70	22	22	16.4	13.7	2.7	79.0	99	358.0	6.24	1.88	4.80	0	1.13	3.16	1.768	4.34	12.89	0.336695	22.7895	2.30355	0.0408163
1	0	57	26.5	0	108	74	133	279	25	46.9	6.40	18	26	12.9	10.8	2.1	72.0	84	288.0	6.87	1.88	4.80	0	0.99	3.03	2.256	4.35	13.88	0.313401	31.3133	2.68045	0.471789
0	0	66	22.3	1	153	73	121.7	219	12	43.4	5.70	8	18	8.9	7.1	1.8	56.0	98	248.0	5.43	1.89	5.00	0	1.04	3.27	3.097	4.42	12.24	0.361111	37.9073	2.77671	0.214886
1	0	44	24.9	0	112	71	102	228	28	46.4	5.70	16	22	11.2	9.6	1.6	42.0	125	199.0	5.51	1.89	5.35	0	1.40	3.19	1.673	4.40	11.63	0.378332	19.457	2.07885	-0.312125
0	1	54	23.3	0	120	80	171	219	54	47.2	7.10	32	21	18.1	14.2	3.9	69.0	108	320.0	7.08	1.90	3.01	0	1.06	1.57	0.643	4.12	13.20	0.312121	8.4876	1.33379	-0.408163
0	0	55	27.4	0	127	81	133	143	17	48.3	6.20	29	23	16.4	13.2	3.2	54.0	107	241.0	5.49	1.91	4.53	0	1.19	2.81	1.357	4.77	13.58	0.351252	18.4281	2.13179	0.0336134
1	1	50	28.2	1	135	94	160	235.6	24	48.6	5.90	18	22	17.1	14.2	2.9	108.0	72	585.0	5.02	1.91	4.71	0	1.11	3.17	4.288	4.91	12.73	0.385703	54.5862	3.16801	0.42377
1	0	51	22.6	0	111	76	96	210	8	42.2	5.60	8	15	12.4	10.6	1.8	54.0	110	198.0	5.37	1.93	4.25	0	1.33	2.48	2.719	3.64	10.40	0.35	28.2776	2.39906	-0.134454
1	1	57	35.8	1	126	93	155	306	17	46.4	5.80	44	33	22.8	17.8	5.0	80.0	100	449.0	5.59	1.93	4.88	0	1.20	3.07	1.526	4.64	13.95	0.332616	21.2877	2.29892	0.195678
1	0	37	22.1	0	106	75	135	201	23	47	5.50	23	24	17.5	14.7	2.8	50.0	125	341.0	4.44	1.93	5.34	0	1.24	3.58	1.423	4.84	11.54	0.419411	16.4214	1.9049	-0.444178
0	1	52	24.9	1	152	110	150	206	137	47.4	5.60	17	47	24.4	18.9	5.5	66.0	111	383.0	5.25	1.94	3.98	0	1.66	1.63	1.524	4.65	15.21	0.30572	23.18	2.46708	0.382953
1	0	78	28	1	170	72	121	141	40	44.6	5.70	17	29	16.4	14.1	2.3	65.0	82	306.0	4.87	1.94	4.80	0	1.30	2.92	1.128	3.81	13.50	0.282222	15.228	1.9362	-0.121248
1	1	37	30.2	0	117	81	178	244	45	49.8	5.60	64	37	18.4	14.4	4.0	82.0	111	380.0	5.68	1.94	5.23	0	1.41	3.38	2.032	5.31	14.35	0.370035	29.1592	2.6391	0.505402
1	1	39	25.3	0	138	85	150	213	32	47.8	5.60	51	28	18.3	16.0	2.3	86.0	104	381.0	5.12	1.94	5.43	0	1.06	3.89	1.520	4.90	13.06	0.375191	19.8512	2.17528	-0.0360144
1	1	55	25.6	1	156	97	178	275	65	48.6	5.40	23	23	21.2	16.8	4.4	87.0	91	327.0	4.25	1.94	6.09	0	1.17	4.48	1.442	5.25	13.69	0.383492	19.741	2.20734	0.0864346
0	0	51	25	0	123	69	141	211	57	51.9	5.70	30	30	23.3	19.5	3.8	70.0	91	251.0	5.63	1.95	5.43	0	1.74	2.83	2.071	4.20	15.15	0.277228	31.3757	2.76571	0.626651
1	1	39	28.1	0	122	87	166	292	56	51.4	5.60	37	23	24.3	20.2	4.1	84.0	107	427.0	4.45	1.96	4.67	0	0.89	3.21	0.873	5.34	13.42	0.397914	11.7157	1.66917	-0.270108
0	0	57	30.1	1	146	70	131	205	13	45	5.40	9	16	18.5	15.6	2.9	66.0	94	264.0	5.10	1.96	5.61	0	1.68	3.58	2.947	4.54	11.67	0.389032	34.3915	2.6504	0.0768307
1	1	40	26.4	0	126	88	179	286	65	47.3	5.40	77	37	11.9	9.7	2.2	94.0	93	525.0	5.29	1.97	4.92	0	1.12	3.34	0.981	4.63	17.87	0.259093	17.5305	2.38433	0.153661
1	1	27	27	1	155	85	152	263	19	52.1	5.80	27	22	18.9	15.3	3.6	90.0	107	393.0	4.79	1.97	5.45	0	1.12	3.62	2.390	4.55	13.62	0.334068	32.5518	2.70318	0.45018
0	0	50	23.7	0	107	69	133	227	24	47.1	5.60	16	18	18.2	15.9	2.3	73.0	87	282.0	5.32	1.97	5.94	0	1.62	3.70	1.108	4.45	14.04	0.316952	15.5563	1.99094	-0.00960384
1	0	47	28	0	103	64	140	257	28	47.8	5.30	23	23	19.8	16.4	3.4	62.0	109	293.0	4.44	1.98	5.13	0	1.01	3.06	1.058	4.28	12.51	0.342126	13.2356	1.73898	-0.422569
0	1	71	27.3	0	126	76	163	181	25	46	5.80	19	22	21.1	18.4	2.7	103.0	67	291.0	5.55	1.98	5.74	0	1.44	4.13	2.865	4.73	12.41	0.381144	35.5547	2.72171	0.231693
0	0	43	22.1	0	113	75	76.7	273.6	12	43.6	5.40	15	17	10.3	8.8	1.5	47.0	122	227.0	5.37	1.99	3.53	0	0.96	1.75	2.269	3.82	11.23	0.34016	25.4809	2.32977	-0.159664
1	0	51	24.2	0	135	85	128	216	15	48.3	5.70	17	21	16.4	14.5	1.9	50.0	113	262.0	5.65	1.99	5.53	0	1.43	3.74	1.394	5.19	15.20	0.341447	21.1888	2.37658	0.314526
1	1	44	25.7	0	124	73	146	202	68	46.8	5.40	32	24	24.3	20.4	3.9	80.0	109	432.0	5.48	2.00	4.17	0	0.94	2.71	0.869	4.55	15.11	0.301125	13.1306	1.89188	0.027611
1	1	54	31.9	1	139	75	158	235	33	45.9	6.50	37	24	27.7	20.9	6.8	78.0	102	395.0	6.98	2.00	4.71	0	1.11	3.18	1.211	4.98	12.53	0.397446	15.1738	1.87673	-0.333733
1	1	32	26	0	117	87	150	214	42	48.7	5.50	21	20	27.7	23.6	4.1	93.0	99	493.0	4.82	2.00	4.87	0	1.01	3.50	1.072	4.44	13.19	0.336619	14.1397	1.84358	-0.241297
1	1	51	26.1	0	113	64	135	292	33	1.74	5.30	29	32	31.6	26.3	5.3	79.0	105	362.0	5.07	2.01	4.40	0	0.96	2.84	2.059	4.61	13.21	0.348978	27.1994	2.49897	0.253301
1	0	46	22.4	0	129	72	132	235	14	45.8	5.40	10	17	20.6	17.6	3.0	56.0	113	252.0	4.76	2.01	4.41	0	1.17	2.75	1.874	3.69	13.24	0.278701	24.8118	2.40886	0.183673
0	1	72	23.4	0	126	80	138.9	134.9	15	41.6	6.50	17	26	18.6	16.2	2.4	111.0	60	380.0	6.87	2.01	5.33	0	1.04	3.61	1.068	4.36	16.22	0.268804	17.323	2.24738	0.177671
1	1	49	27.3	0	119	81	154	206	30	51.5	5.90	30	31	21.8	18.5	3.3	102.0	78	476.0	5.55	2.02	5.45	0	1.19	4.05	3.812	4.56	12.97	0.351581	49.4416	3.08262	0.465786
1	1	32	27	1	144	86	161	257	86	50.3	6.30	48	24	15.6	13.6	2.0	76.0	121	363.0	6.68	2.02	6.24	0	1.17	4.74	1.552	4.78	12.01	0.398002	18.6395	2.05489	-0.278511
1	1	36	28.4	0	112	72	149	317	216	48.8	5.40	53	24	18.9	15.5	3.4	72.0	120	416.0	5.07	2.03	4.00	0	0.75	2.66	1.723	5.55	16.98	0.326855	29.2565	2.82788	0.534214
1	1	41	25.2	0	106	64	143	284	102	47.3	5.80	32	26	20.1	17.2	2.9	78.0	113	423.0	6.32	2.04	5.09	0	0.99	3.70	1.881	4.80	10.56	0.454545	19.8634	2.05212	-0.357743
0	0	51	24.8	0	92	64	125	266	16	46.7	6.00	42	23	15.1	13.9	1.2	47.0	116	241.0	4.93	2.04	8.59	0	1.15	6.81	2.042	4.51	12.05	0.374274	24.6061	2.33465	-0.0504202
1	1	43	29.5	1	138	87	145	264	60	47.2	5.90	29	22	19.5	16.4	3.1	121.0	66	551.0	5.38	2.05	5.31	0	1.15	3.82	1.352	4.43	13.90	0.318705	18.7928	2.17113	0.104442
0	0	55	27.3	0	121	77	131	178	21	47.7	5.60	67	21	22.7	19.0	3.7	76.0	80	275.0	4.70	2.06	4.60	0	0.93	2.98	1.059	4.26	12.43	0.342719	13.1634	1.72916	-0.445378
0	0	52	21.3	0	122	67	139	242	32	45.9	5.90	20	22	14.9	12.4	2.5	50.0	112	307.0	5.40	2.06	5.17	0	1.13	3.47	0.835	4.55	14.46	0.314661	12.0741	1.76455	-0.0792317
1	1	29	27	0	128	67	154	270	48	48.8	5.80	33	24	14	11.8	2.2	104.0	89	463.0	5.23	2.06	5.38	0	1.07	3.76	2.250	4.77	11.79	0.40458	26.5275	2.39669	-0.0528211
1	1	43	26.9	0	118	75	157	270	28	51.7	5.60	80	42	48.5	41.6	6.9	87.0	99	371.0	4.76	2.07	5.51	0	1.14	3.81	0.901	4.93	14.84	0.33221	13.3708	1.89173	0.00840336
1	1	40	26.9	0	131	81	155	186	37	47.2	5.80	34	25	14.7	12.0	2.7	77.0	114	389.0	4.97	2.09	4.41	0	0.86	3.14	1.048	5.34	12.50	0.4272	13.1	1.72813	-0.430972
1	1	42	29.3	1	164	110	147	222	55	48.5	5.00	59	41	35.1	28.7	6.4	98.0	86	416.0	5.67	2.09	4.64	0	1.09	3.10	2.337	4.97	12.77	0.389193	29.8435	2.56643	0.210084
0	0	42	24.9	0	119	77	119.8	158.9	18	48.3	5.60	11	31	12.7	10.6	2.1	59.0	114	377.0	4.70	2.09	5.21	0	1.28	3.36	1.692	4.00	12.82	0.312012	21.6914	2.2502	-0.0168067
1	1	48	28	1	142	85	155	226	36	48	5.50	20	24	17.4	13.9	3.5	82.0	103	395.0	5.18	2.10	3.43	0	0.98	2.04	3.446	4.44	13.13	0.338157	45.246	3.0032	0.484994
0	1	31	19.2	0	116	65	164	214	20	49.3	5.30	25	13	21.5	17.5	4.0	90.0	104	375.0	5.04	2.10	4.59	0	1.53	2.76	1.192	4.96	15.12	0.328042	18.023	2.20927	0.196879
1	1	65	27.9	1	155	89	136.4	118.5	87	46.5	6.80	39	33	11.2	9.3	1.9	70.0	100	375.0	7.30	2.10	5.23	0	1.31	3.49	1.035	4.79	12.98	0.369029	13.4343	1.78021	-0.315726
1	1	42	29.4	0	124	75	154	134	61	46.6	5.80	63	37	26.1	20.5	5.6	67.0	118	440.0	4.68	2.11	3.88	0	0.94	2.30	1.467	4.57	13.37	0.34181	19.6138	2.18148	0.0228091
0	0	37	23	0	108	72	134	290	11	46.8	5.40	12	19	11.9	10.1	1.8	55.0	121	220.0	4.97	2.11	4.10	0	1.41	2.52	0.619	4.18	12.15	0.344033	7.52085	1.15452	-0.684274
0	1	47	29.5	0	125	78	170	173	27	45.5	5.60	15	18	26.4	22.1	4.3	88.0	95	467.0	5.63	2.11	4.48	0	1.13	2.50	0.604	4.73	15.29	0.309353	9.23516	1.55232	-0.0336134
1	1	41	25.1	0	125	81	155	174	13	47.7	5.50	13	18	19.3	15.7	3.6	82.0	108	551.0	5.25	2.12	5.33	0	1.22	3.57	2.568	4.80	13.60	0.352941	34.9248	2.77233	0.494598
0	0	50	25.7	1	143	103	135	211.4	15	48.2	5.80	17	24	14.8	13.3	1.5	65.0	100	290.0	4.98	2.12	5.51	0	1.68	3.31	1.688	4.66	10.93	0.426349	18.4498	1.99363	-0.421369
1	0	29	26.1	0	113	72	137	332	14	48.7	5.60	15	19	16.5	13.5	3.0	55.0	128	339.0	4.72	2.13	4.03	0	0.93	2.59	1.645	5.02	11.86	0.423272	19.5097	2.09291	-0.273709
0	1	39	24.6	0	111	65	152	230	19	47.4	5.20	11	17	31.8	28.3	3.5	112.0	75	356.0	4.60	2.13	6.49	0	1.14	4.77	1.643	4.49	11.77	0.381478	19.3381	2.07959	-0.29892
0	1	40	25.8	1	128	84	161	323	38	49.6	5.80	49	34	19.3	15.3	4.0	90.0	97	418.0	5.43	2.14	3.92	0	0.89	2.52	1.248	3.92	14.58	0.268861	18.1958	2.18255	0.145258
0	1	56	19.7	1	155	115	151	158	64	44.9	5.00	8	24	33.7	26.0	7.7	70.0	106	427.0	4.88	2.14	4.63	0	1.66	2.62	0.995	2.48	9.77	0.253838	9.72115	1.30905	-0.829532
1	1	42	29.6	1	135	81	165	301	106	48.7	5.60	45	30	25.9	21.5	4.4	83.0	106	503.0	5.06	2.14	5.79	0	1.14	3.68	1.063	5.96	14.87	0.400807	15.8068	2.06111	0.0948379
1	0	45	26.1	0	129	80	84	261	13	45.6	5.80	20	17	9.8	8.3	1.5	69.0	97	377.0	5.87	2.15	3.23	0	0.93	1.54	1.052	3.38	11.90	0.284034	12.5188	1.65124	-0.571429
0	1	44	22.5	0	125	88	160	251	18	47.9	5.40	12	18	16.9	13.8	3.1	73.0	114	382.0	5.30	2.15	5.47	0	1.04	3.90	2.290	5.20	15.33	0.339204	35.1057	2.89044	0.690276
0	1	38	30.8	0	125	86	149	212	38	49.7	5.40	22	24	14.1	11.7	2.4	64.0	125	431.0	5.32	2.16	4.24	0	1.19	2.41	2.883	4.47	14.72	0.303668	42.4378	3.03867	0.752701
1	1	39	25.6	0	116	79	164	195	27	47.5	5.40	25	21	27.5	23.5	4.0	94.0	93	290.0	4.72	2.17	5.29	0	1.13	3.53	2.364	3.47	14.82	0.234143	35.0345	2.85365	0.65066
1	1	60	27.4	1	145	77	133	263	46	50.4	7.50	24	22	16.6	13.7	2.9	115.0	63	398.0	8.10	2.17	5.64	0	1.02	3.72	2.064	4.49	14.34	0.31311	29.5978	2.65338	0.511405
1	1	27	27	0	115	69	155	261	61	50	5.80	91	47	15	12.3	2.7	72.0	129	557.0	5.75	2.17	5.80	0	1.16	4.22	1.503	5.79	18.25	0.31726	27.4297	2.86209	0.427371
1	0	59	25.2	0	121	81	132	272	27	47.7	5.30	14	18	22	19.1	2.9	61.0	100	287.0	5.24	2.18	4.65	0	1.01	3.07	1.958	3.70	12.66	0.292259	24.7883	2.37469	0.0720288
1	1	46	28.2	1	139	94	160	274	24	48.8	5.50	34	25	26.3	21.6	4.7	86.0	99	453.0	4.66	2.18	5.39	0	0.88	3.70	2.736	4.64	12.93	0.358855	35.3765	2.74558	0.340936
1	1	49	24.3	0	127	88	173	234	47	50.4	11.90	29	28	25.8	21.4	4.4	68.0	112	199.0	16.09	2.19	6.69	0	1.06	5.00	1.621	4.08	13.50	0.302222	21.8835	2.29879	0.133253
0	0	53	18.8	0	110	62	133	231	16	47.2	7.90	26	26	30	27.4	2.6	57.0	107	277.0	6.85	2.19	10.18	0	1.43	8.03	1.099	3.78	9.90	0.381818	10.8801	1.42595	-0.776711
1	1	32	23.9	0	112	77	165	276	363	52.9	5.30	45	34	29.7	24.1	5.6	89.0	105	412.0	5.21	2.20	6.53	0	2.12	3.83	0.823	4.77	16.22	0.294081	13.3491	1.98679	0.0540216
0	1	28	28.1	0	93	52	142	208	20	45.7	5.60	24	21	20	16.8	3.2	83.0	116	309.0	4.50	2.22	3.75	0	0.81	2.33	3.929	3.40	11.27	0.301686	44.2798	2.8842	0.0840336
1	0	59	22.3	1	149	83	143	169	13	45.8	5.60	15	22	11.7	10.0	1.7	67.0	90	351.0	5.08	2.22	5.79	0	1.20	3.97	1.870	3.88	12.77	0.303837	23.8799	2.3435	0.057623
0	1	50	24.1	0	128	84	134	152	62	44.7	5.30	34	37	16.9	13.6	3.3	74.0	108	327.0	5.16	2.23	4.27	0	0.87	2.65	2.746	3.60	12.39	0.290557	34.0229	2.6766	0.207683
1	1	40	26	0	129	70	149	206	60	46.1	5.70	51	33	20	16.0	4.0	71.0	118	411.0	4.43	2.23	4.82	0	0.95	3.23	1.912	5.03	14.92	0.337131	28.527	2.65489	0.533013
1	1	36	26.7	1	158	83	152	202	92	48.6	5.50	58	31	15.5	12.9	2.6	89.0	102	489.0	4.73	2.23	4.85	0	0.86	3.26	1.317	4.32	13.35	0.323596	17.5819	2.07093	-0.0456182
1	1	39	26.3	0	115	66	144	120	28	47.4	5.40	29	22	24.4	19.7	4.7	87.0	102	384.0	5.00	2.23	4.92	0	1.14	3.22	0.730	5.04	13.33	0.378095	9.7309	1.47817	-0.348139
0	0	58	19.3	0	120	79	146	249	21	45.8	5.80	20	27	23.6	21.1	2.5	62.0	100	256.0	5.51	2.23	6.46	0	1.40	4.49	1.894	4.68	14.51	0.322536	27.4819	2.59029	0.460984
1	1	58	28.4	1	129	81	143	218	20	44.9	6.00	31	27	15.5	13.5	2.0	97.0	78	535.0	5.72	2.24	4.62	0	0.79	3.15	2.205	4.33	11.48	0.377178	25.3134	2.33479	-0.129652
0	0	37	20.8	0	104	71	134	301	12	46.4	5.40	12	17	13.5	12.4	1.1	57.0	120	282.0	4.57	2.24	4.74	0	1.20	3.00	1.816	3.13	11.18	0.279964	20.3029	2.10035	-0.322929
0	1	47	20.7	1	144	108	171	199	66	47.7	5.50	32	46	16.7	13.5	3.2	72.0	111	329.0	5.45	2.24	5.02	0	1.65	2.42	3.722	4.11	14.25	0.288421	53.0385	3.23089	0.771909
0	0	59	24.5	0	126	64	122	217	22	47.4	5.70	19	22	28	23.4	4.6	53.0	105	221.0	5.53	2.24	5.11	0	1.21	3.11	3.457	3.84	14.68	0.26158	50.7488	3.21486	0.813926
1	1	47	27.1	1	140	83	158	212	26	48.8	5.30	22	28	30.4	25.8	4.6	92.0	90	356.0	5.13	2.24	5.20	0	1.00	3.80	1.983	4.88	13.75	0.354909	27.2662	2.53399	0.361345
0	1	60	22	0	116	69	144	222	25	45.5	6.40	24	29	16.3	13.9	2.4	62.0	108	358.0	5.38	2.24	5.94	0	0.78	4.21	1.524	3.78	13.37	0.282723	20.3759	2.2196	0.0588235
1	0	61	28.4	0	125	52	143	184	66	42.9	6.60	57	36	17.8	14.6	3.2	52.0	104	292.0	5.31	2.25	4.24	0	1.27	2.31	1.866	4.95	12.49	0.396317	23.3063	2.3037	-0.0204082
1	1	63	23.4	0	129	76	133	225	56	47.3	5.80	31	28	13	10.2	2.8	83.0	91	402.0	4.91	2.25	4.88	0	1.18	2.81	1.915	4.06	11.24	0.36121	21.5246	2.1615	-0.262905
0	1	49	29.1	1	129	87	162	183	40	52.8	5.60	37	26	36.9	31.8	5.1	77.0	107	326.0	5.29	2.25	5.50	0	0.98	3.90	1.614	4.68	14.16	0.330508	22.8542	2.38324	0.272509
0	1	71	22.3	1	129	90	136	132	16	48.1	5.30	12	46	21.4	17.2	4.2	117.0	57	473.0	5.59	2.26	3.71	0	1.30	1.62	4.434	4.67	14.34	0.325662	63.5836	3.41803	0.813926
1	1	52	27.5	0	106	62	157	203	20	44.9	5.50	25	25	13.7	11.5	2.2	101.0	78	368.0	4.74	2.26	4.88	0	1.37	3.04	2.030	5.14	10.49	0.48999	21.2947	2.11894	-0.296519
1	1	45	25.6	0	102	66	147	181	139	48.9	6.00	27	25	10.5	8.4	2.1	56.0	125	328.0	5.36	2.27	4.15	0	0.79	2.66	1.501	4.62	14.00	0.33	21.014	2.28913	0.187275
0	0	46	24.9	0	120	70	137	273	27	45.1	5.00	12	20	10.8	9.3	1.5	59.0	111	310.0	4.83	2.27	4.66	0	1.40	2.77	1.917	4.85	11.26	0.430728	21.5854	2.16523	-0.255702
1	1	52	25.6	0	135	90	144	223	29	46.3	8.80	26	21	16	13.7	2.3	64.0	113	333.0	9.42	2.27	5.15	0	1.07	3.66	0.989	4.64	14.52	0.319559	14.3603	1.94188	0.00960384
1	1	26	24.3	0	134	79	156	267	34	48.5	5.30	21	18	20.6	17.3	3.3	74.0	127	376.0	4.80	2.27	5.16	0	0.85	3.67	0.856	4.86	14.10	0.344681	12.0696	1.74097	-0.122449
1	0	61	23.2	1	164	98	140	197	8	47	5.50	54	52	12.3	10.2	2.1	49.0	106	290.0	4.75	2.27	5.44	0	1.39	3.46	1.395	5.42	12.44	0.435691	17.3538	2.00607	-0.254502
1	0	44	24.7	0	99	56	121	279	37	43	5.80	23	40	12.9	11.1	1.8	45.0	122	286.0	5.40	2.27	5.93	0	1.29	3.93	2.403	4.38	10.04	0.436255	24.1261	2.2271	-0.218487
1	0	49	37.2	1	143	80	119	209	32	40.9	5.60	24	26	9.9	8.1	1.8	76.0	84	485.0	5.36	2.28	4.05	0	0.88	2.50	1.501	4.52	13.47	0.335561	20.2185	2.21785	0.062425
0	1	40	23.3	0	133	87	152	245	59	44.2	5.50	14	19	14.3	11.0	3.3	73.0	116	499.0	5.69	2.28	4.61	0	1.37	2.70	1.306	5.23	13.55	0.385978	17.6963	2.08944	-0.00240096
1	1	57	25.1	0	127	77	141	248	145	46.7	7.50	21	21	33.7	27.6	6.1	98.0	78	427.0	6.75	2.28	4.64	0	1.05	3.01	2.479	4.19	11.36	0.368838	28.1614	2.43578	-0.0696279
0	0	55	20.2	0	132	88	136	211	30	46.5	5.60	18	23	8.7	6.9	1.8	70.0	88	351.0	6.01	2.29	3.74	0	0.93	2.21	1.275	4.66	13.99	0.333095	17.8373	2.1246	0.0708283
0	1	41	23.7	0	118	72	164	306	35	54.2	5.50	24	33	25.2	22.2	3.0	71.0	117	341.0	5.27	2.32	6.70	1	1.30	4.70	1.597	5.03	14.75	0.341017	23.5557	2.452	0.358944
0	1	27	23.4	0	110	73	158	130	22	51.7	5.40	15	21	11.3	8.8	2.5	97.0	97	409.0	5.08	2.33	3.64	1	1.17	1.94	1.899	3.68	17.75	0.207324	33.7073	3.0287	0.615846
0	1	56	27.8	1	141	93	147	129	19	47.5	6.50	15	18	12.6	10.5	2.1	108.0	70	339.0	6.08	2.34	4.19	1	0.82	2.88	2.105	4.51	11.44	0.394231	24.0812	2.283	-0.160864
0	1	40	24	0	120	87	153	215	84	47.5	5.20	31	26	14.5	12.1	2.4	86.0	102	355.0	4.77	2.34	4.93	1	1.03	3.09	2.338	4.02	10.85	0.370507	25.3673	2.30862	-0.190876
1	1	44	27.7	0	126	76	156	183	65	47.1	5.50	38	29	25	20.0	5.0	66.0	118	389.0	5.76	2.35	4.32	1	1.15	2.66	2.591	5.26	13.43	0.39166	34.7971	2.75838	0.453782
0	0	61	27.8	1	151	73	136	301	37	47.7	5.50	25	26	19.9	18.2	1.7	68.0	88	267.0	4.90	2.35	7.34	1	1.06	5.20	1.723	4.52	14.65	0.308532	25.2419	2.51449	0.408163
0	1	53	26.1	1	122	89	162	173	53	49.3	5.90	30	25	27.9	23.9	4.0	74.0	105	321.0	6.07	2.37	4.53	1	0.96	2.84	0.987	4.38	15.12	0.289683	14.9234	2.02055	0.0888355
1	0	49	24.8	0	127	86	144	303	42	44.7	6.50	9	14	14.1	12.3	1.8	66.0	99	283.0	5.15	2.37	5.55	1	1.74	3.32	2.411	4.09	11.97	0.341688	28.8597	2.49001	0.0252101
1	1	50	27.1	0	114	67	156	206	85	47.7	6.20	44	32	25.6	22.6	3.0	79.0	105	463.0	5.38	2.37	6.27	1	1.17	4.29	2.471	4.28	11.19	0.382484	27.6505	2.40968	-0.103241
0	1	57	24	0	116	76	152	290	26	51.8	6.30	16	19	12.8	10.8	2.0	94.0	82	414.0	6.01	2.38	5.74	1	1.00	3.99	1.159	4.17	12.06	0.345771	13.9775	1.76963	-0.480192
1	1	60	24.7	0	136	77	150	193	22	49.9	5.40	16	18	29.8	25.4	4.4	79.0	98	376.0	4.83	2.39	4.64	1	0.93	3.05	4.377	4.28	13.56	0.315634	59.3521	3.30018	0.648259
1	1	39	24.4	0	131	79	163	305	236	50.2	5.40	29	20	20.7	17.6	3.1	66.0	114	358.0	5.05	2.39	5.63	1	1.18	3.91	3.052	5.42	13.23	0.409675	40.378	2.89523	0.471789
0	0	50	25.6	1	138	80	113	255	11	46.5	5.60	50	18	9.4	7.9	1.5	56.0	110	260.0	4.79	2.40	3.82	1	0.89	2.33	20.279	4.17	14.77	0.282329	299.521	4.99615	0.779112
1	1	54	24	0	110	73	142	302	17	40.4	5.60	10	19	9.1	7.5	1.6	69.0	108	355.0	4.49	2.42	3.94	1	0.80	2.47	1.538	5.07	13.88	0.365274	21.3474	2.29734	0.193277
0	1	72	26.2	0	129	84	153.2	114.7	29	45.7	5.70	15	20	16	13.4	2.6	94.0	74	349.0	4.99	2.42	6.34	1	1.19	4.26	3.807	3.75	14.70	0.255102	55.9629	3.31399	0.837935
1	1	51	28.1	1	122	82	157	240	21	46.6	5.80	20	20	15.8	13.2	2.6	81.0	103	385.0	5.82	2.43	3.76	1	0.74	2.33	1.909	5.17	13.08	0.39526	24.9697	2.40584	0.157263
1	1	58	27.4	1	137	92	148.7	237.2	56	46.3	5.70	34	28	16.4	13.4	3.0	94.0	82	388.0	5.19	2.43	4.44	1	0.96	2.72	1.470	4.14	12.70	0.325984	18.669	2.09341	-0.162065
1	0	52	28.5	0	135	83	138	205	59	43.8	6.30	46	29	17	13.7	3.3	44.0	116	312.0	5.99	2.43	5.26	1	1.32	2.97	3.492	4.33	11.50	0.376522	40.158	2.79722	0.0984394
1	1	54	24.2	0	109	72	161	239	38	44.9	5.70	11	20	42.6	37.1	5.5	93.0	85	334.0	4.89	2.44	5.03	1	1.19	3.34	1.890	4.50	13.31	0.338092	25.1559	2.42677	0.212485
1	1	51	32.1	0	129	90	162	292	45	48.4	5.50	26	23	24.5	20.7	3.8	76.0	106	249.0	4.78	2.44	5.07	1	1.08	3.59	0.524	4.34	14.97	0.289913	7.84428	1.3672	-0.0744298
1	1	50	27.7	0	136	89	158	179	57	48	5.90	29	33	19.4	15.8	3.6	101.0	79	559.0	6.44	2.45	4.92	1	1.12	3.29	0.846	5.33	15.39	0.346329	13.0199	1.90272	0.0432173
0	0	38	26.5	0	126	77	146	187	15	47.2	5.50	12	19	15.4	13.5	1.9	82.0	82	360.0	5.75	2.45	5.88	1	1.24	3.73	2.933	3.84	11.39	0.337138	33.4069	2.60798	0.0180072
1	0	54	26.9	1	134	81	131	206	77	48.2	6.10	64	58	15.6	12.5	3.1	56.0	107	269.0	4.56	2.46	4.49	1	1.00	2.88	2.389	3.74	11.37	0.328936	27.1629	2.40014	-0.0996399
0	1	63	23.1	1	135	72	126	260	57	43.9	6.10	13	19	10.5	8.9	1.6	134.0	51	407.0	5.25	2.47	4.86	1	0.89	3.33	1.983	4.41	15.02	0.293609	29.7847	2.7048	0.578631
1	1	66	26.7	1	140	91	145	170	103	43.9	5.80	47	28	15.5	13.0	2.5	97.0	74	465.0	5.29	2.47	5.17	1	1.23	3.33	2.551	4.60	13.32	0.345345	33.9793	2.72803	0.420168
1	0	49	23.5	0	127	60	140	280	49	45.8	5.40	23	26	17.1	14.5	2.6	67.0	97	377.0	4.97	2.47	5.65	1	1.27	3.94	1.954	4.11	12.23	0.336059	23.8974	2.31481	-0.0432173
1	0	58	29.3	1	156	79	136	215	24	44.1	5.90	17	20	23.2	20.6	2.6	57.0	103	469.0	5.18	2.48	4.61	1	1.11	3.08	2.845	4.55	12.24	0.371732	34.8228	2.69184	0.176471
1	1	50	24.6	0	117	80	136	236	19	47.9	5.60	17	24	30.7	26.1	4.6	83.0	100	460.0	5.26	2.49	5.34	1	1.04	3.52	1.804	4.23	13.38	0.316143	24.1375	2.38962	0.195678
1	0	35	27.5	0	105	66	128	412	20	49.2	5.40	9	15	23	18.7	4.3	67.0	108	416.0	5.19	2.50	4.69	1	0.92	3.25	1.440	4.02	13.43	0.29933	19.3392	2.17098	0.0240096
1	1	61	21	1	147	92	170	198	223	48.5	6.50	57	60	27.1	21.0	6.1	89.0	85	330.0	9.13	2.50	5.34	1	1.56	3.41	3.279	5.55	15.62	0.355314	51.218	3.28843	0.882353
1	1	56	24.5	0	139	91	153	264	50	48.6	8.20	32	25	12.6	10.9	1.7	75.0	103	292.0	10.23	2.50	5.59	1	1.19	3.84	1.646	4.89	16.66	0.293517	27.4224	2.73912	0.480192
1	0	58	29.1	1	150	77	142	281	56	46.6	12.10	65	46	11.9	9.9	2.0	58.0	103	278.0	10.81	2.50	5.78	1	1.03	3.69	2.540	4.63	13.12	0.352896	33.3248	2.6968	0.352941
0	0	47	22.6	0	117	65	135	310	79	45.5	5.60	19	26	9.4	8.1	1.3	61.0	108	345.0	4.97	2.51	4.52	1	0.96	2.69	1.478	4.51	12.53	0.359936	18.5193	2.07597	-0.194478
0	1	59	24.5	1	166	100	154	230	22	46	5.30	16	23	22.9	19.0	3.9	98.0	77	428.0	5.61	2.52	4.15	1	1.05	2.32	2.346	4.48	13.28	0.337349	31.1549	2.63887	0.348139
1	1	52	30.7	0	131	84	149	248	27	46	6.20	15	14	11.2	9.4	1.8	66.0	112	353.0	6.14	2.52	4.67	1	1.09	3.16	1.817	4.53	10.97	0.412944	19.9325	2.07265	-0.351741
1	0	39	30.8	1	149	78	148	256	44	46.5	8.60	39	30	26.9	21.8	5.1	44.0	128	257.0	10.41	2.53	4.22	1	1.01	2.84	3.998	4.65	12.94	0.359351	51.7341	3.12622	0.469388
0	1	52	25.7	0	122	78	152	267	96	49	5.60	39	23	12.6	10.0	2.6	94.0	84	429.0	5.15	2.53	4.88	1	1.00	3.06	1.472	4.62	14.57	0.31709	21.447	2.34629	0.264106
1	0	53	26.7	0	133	81	135	236	56	50.2	6.00	56	49	18.9	15.3	3.6	61.0	104	444.0	4.56	2.53	5.11	1	1.09	3.23	1.255	4.55	13.49	0.337287	16.93	2.04154	-0.060024
1	1	44	33.8	0	120	75	171	196	45	48.6	12.60	27	18	16.3	14.0	2.3	55.0	128	338.0	14.88	2.53	6.99	1	1.03	5.25	1.007	4.40	12.79	0.344019	12.8795	1.72723	-0.370948
1	1	44	22.4	1	119	83	148	219	167	50.7	5.50	42	28	20.2	16.5	3.7	77.0	110	369.0	5.63	2.54	4.82	1	1.20	3.03	1.500	5.85	13.30	0.43985	19.95	2.19432	0.0204082
1	0	44	26.7	1	152	92	152	223	22	47.1	6.10	25	21	15.2	13.6	1.6	61.0	111	302.0	5.20	2.54	5.82	1	1.47	3.88	0.841	5.27	14.32	0.368017	12.0431	1.75288	-0.0960384
0	1	35	23.7	0	103	62	149	216	33	50.8	5.20	16	21	21	16.6	4.4	100.0	88	414.0	4.99	2.55	4.27	1	1.11	2.56	1.779	4.20	15.08	0.278515	26.8273	2.60431	0.487395
1	1	51	25.5	1	146	84	133.8	191.8	147	49.9	5.70	66	37	16	13.0	3.0	78.0	105	417.0	4.97	2.55	5.68	1	1.30	3.76	3.138	4.68	12.33	0.379562	38.6915	2.80197	0.248499
1	0	49	29.2	0	133	76	112.1	220.9	82	46.3	6.30	63	63	17.2	14.0	3.2	51.0	113	523.0	6.00	2.57	4.15	1	1.12	2.53	2.480	4.00	11.11	0.360036	27.5528	2.40255	-0.114046
1	1	31	31.5	0	120	74	151	291	74	52.2	5.60	61	35	20.6	17.4	3.2	76.0	122	385.0	4.81	2.57	5.41	1	0.87	3.64	1.232	4.98	10.47	0.475645	12.899	1.61685	-0.691477
1	1	49	31.2	1	123	77	133	182	135	47.3	5.40	80	37	21.6	18.5	3.1	92.0	89	275.0	5.13	2.57	5.65	1	0.99	3.65	1.179	4.40	11.41	0.385627	13.4524	1.69931	-0.601441
0	0	37	26	0	101	62	105	228	15	48.9	5.50	15	17	9.5	8.4	1.1	59.0	118	278.0	4.72	2.59	5.42	1	0.89	3.57	2.424	3.01	11.04	0.272645	26.761	2.3703	-0.139256
0	0	51	24.4	1	131	83	125	215	16	48.4	5.80	24	26	26.8	23.6	3.2	55.0	109	356.0	5.29	2.59	5.54	1	1.51	3.42	1.725	3.71	12.49	0.297038	21.5452	2.22513	-0.0780312
1	1	39	30.5	0	125	80	155	237	46	46.4	5.40	26	26	14	11.6	2.4	75.0	116	627.0	5.69	2.60	5.13	1	1.02	3.36	2.122	5.38	13.76	0.390988	29.1987	2.60308	0.411765
1	1	50	28	1	146	91	151	276	97	44.2	5.40	20	14	14.3	11.4	2.9	91.0	89	595.0	5.35	2.64	4.52	1	1.11	2.93	2.507	4.65	13.04	0.356595	32.6913	2.67297	0.332533
1	1	29	26.1	0	116	76	159	310.6	83	50.70	5.50	57	27	7.5	6.6	0.9	75.0	124	347.0	4.56	2.65	5.19	1	1.11	3.56	1.826	4.58	12.11	0.3782	22.1129	2.23092	-0.134454
1	0	36	24.4	0	108	63	126	319	18	43.3	5.40	47	32	11.7	9.9	1.8	52.0	124	209.0	4.77	2.66	4.18	1	1.08	2.46	0.695	4.30	13.06	0.32925	9.0767	1.39273	-0.434574
1	1	42	29.4	0	111	72	179	181	22	50.1	5.40	144	53	23.5	19.0	4.5	111.0	75	549.0	4.44	2.66	4.77	1	0.94	2.83	1.928	4.97	14.09	0.352732	27.1655	2.55159	0.421369
0	1	41	26	1	139	98	165	128	39	48.8	5.40	22	18	19.2	15.9	3.3	90.0	97	352.0	5.96	2.67	5.34	1	1.36	3.44	0.503	4.92	14.07	0.34968	7.07721	1.20525	-0.213685
1	0	55	29.1	0	129	74	128	208	28	47.3	5.80	23	25	15.8	13.8	2.0	59.0	104	243.0	5.12	2.67	6.21	1	1.50	3.70	2.960	4.62	10.62	0.435028	31.4352	2.51358	-0.0780312
1	0	60	22.4	1	142	77	140	236	26	45.3	6.50	18	21	23.3	20.6	2.7	71.0	83	246.0	5.40	2.68	5.21	1	1.18	3.38	1.033	4.15	11.61	0.35745	11.9931	1.59401	-0.648259
1	1	44	26.4	0	117	80	156	200	69	51.5	6.10	65	40	19.3	16.5	2.8	83.0	104	462.0	5.96	2.68	6.06	1	1.13	4.03	2.216	4.94	12.77	0.386844	28.2983	2.51327	0.178872
1	1	35	25	0	124	79	173	242	25	48.1	5.50	19	25	21	17.7	3.3	71.0	122	414.0	5.18	2.71	4.10	1	0.89	2.62	1.156	5.49	13.32	0.412162	15.3979	1.93651	-0.152461
0	0	48	21.3	0	109	63	128	252	30	43.8	5.20	23	23	20.9	18.1	2.8	49.0	116	235.0	5.66	2.71	4.67	1	1.00	2.21	1.344	4.38	14.41	0.303956	19.367	2.2338	0.190876
1	0	57	26.5	0	124	49	147	251	18	48	5.70	25	25	14.1	12.5	1.6	53.0	107	280.0	5.11	2.74	5.24	1	1.22	3.23	3.720	3.96	10.74	0.368715	39.9528	2.75825	0.00720288
0	0	56	22.8	0	116	73	123	263	33	41.9	5.50	26	26	17.6	15.6	2.0	78.0	77	382.0	5.19	2.74	6.29	1	1.35	4.02	2.430	4.09	13.54	0.302068	32.9022	2.70902	0.442977
1	1	27	29.5	0	116	76	167	235	40	48.2	5.30	17	33	52.3	44.4	7.9	90.0	106	560.0	4.87	2.75	4.92	1	0.91	3.24	1.466	5.60	13.07	0.428462	19.1606	2.14045	-0.0672269
1	1	39	26.1	1	149	93	155	264	122	46.9	5.60	30	28	10.3	8.6	1.7	83.0	108	390.0	5.05	2.75	6.74	1	1.28	4.76	3.240	4.67	12.24	0.381536	39.6576	2.82185	0.231693
1	0	49	28.5	1	160	100	139	273	18	47.4	6.00	18	21	10.7	9.3	1.4	46.0	118	227.0	6.04	2.76	5.13	1	1.34	3.05	2.506	4.30	12.90	0.333333	32.3274	2.65374	0.291717
1	1	54	32.5	0	126	87	176	173	80	46	5.60	50	32	17	13.0	4.0	73.0	105	373.0	4.52	2.77	4.08	1	0.93	2.45	0.666	4.23	12.58	0.336248	8.37828	1.28554	-0.561825
1	1	34	28.2	0	122	74	146	286	28	47.7	5.60	40	26	18.1	15.5	2.6	87.0	105	382.0	5.30	2.77	7.15	1	1.41	4.12	0.714	5.39	12.88	0.418478	9.19632	1.39549	-0.480192
1	1	62	29.8	0	124	88	159	158	35	46.9	5.50	22	19	18.3	15.7	2.6	93.0	80	365.0	4.83	2.78	6.19	1	1.33	3.85	3.704	3.70	11.76	0.314626	43.559	2.89113	0.166867
1	0	42	27	0	129	66	112	307	46	44.8	5.40	14	20	9.8	8.6	1.2	50.0	121	244.0	4.69	2.79	3.91	1	1.02	2.27	0.882	4.44	11.69	0.379812	10.3106	1.44674	-0.696279
1	0	47	25.2	1	147	91	120	185	87	47.2	5.10	25	29	13.7	11.5	2.2	54.0	114	287.0	5.17	2.81	5.62	1	1.38	3.66	2.508	4.48	14.19	0.315715	35.5885	2.82804	0.605042
1	1	54	29	0	114	73	148	160	14	45.6	5.40	37	19	21.7	18.0	3.7	86.0	93	408.0	5.10	2.82	4.07	1	1.00	2.08	1.833	3.85	13.02	0.295699	23.8657	2.35714	0.0996399
1	0	55	32.8	1	143	79	125	176	47	48.7	7.40	35	37	19.9	16.0	3.9	39.0	119	183.0	6.82	2.82	4.65	1	0.98	2.82	4.129	3.64	12.73	0.285939	52.5622	3.13022	0.420168
0	1	46	24.8	1	143	98	156	220	34	46.7	5.60	18	23	21.1	18.6	2.5	73.0	112	300.0	5.04	2.85	4.89	1	1.01	2.98	0.903	4.71	13.82	0.34081	12.4795	1.75676	-0.164466
1	1	28	29.3	1	131	93	159	283	91	50.9	5.60	22	78	16.2	13.1	3.1	79.0	122	605.0	5.18	2.85	5.82	1	1.18	3.87	1.839	5.23	16.97	0.308191	31.2078	2.89169	0.581032
0	1	53	24.1	0	123	79	156	233	40	48.4	5.90	18	29	20.2	16.5	3.7	74.0	106	300.0	5.23	2.86	4.98	1	1.20	2.77	1.090	5.11	13.59	0.376012	14.8131	1.91403	-0.111645
1	1	59	27.7	1	128	82	157	175	29	47.6	9.00	41	27	19.9	15.7	4.2	73.0	102	454.0	8.95	2.87	3.58	1	0.98	1.63	1.871	4.84	14.39	0.336345	26.9237	2.56193	0.438175
1	1	50	28.1	1	173	98	160	247	39	51.1	6.10	17	24	24.7	20.7	4.0	99.0	81	396.0	7.64	2.88	5.04	1	1.12	3.06	2.363	4.02	14.50	0.277241	34.2635	2.81018	0.605042
1	1	38	32.2	0	116	74	163	162	33	45.2	5.30	38	28	18.7	16.0	2.7	85.0	105	532.0	5.07	2.90	4.09	1	0.97	2.27	2.102	4.54	13.04	0.34816	27.4101	2.49677	0.218487
0	0	58	23.2	1	168	74	137	232	105	44.6	6.30	34	35	14.4	12.4	2.0	71.0	85	321.0	6.58	2.91	3.58	1	0.93	1.94	1.691	3.97	10.91	0.363886	18.4488	1.99272	-0.420168
1	1	26	30.1	1	144	80	155	252	129	50.2	5.50	128	52	8.9	6.8	2.1	95.0	101	375.0	4.17	2.96	5.29	1	0.91	3.56	1.275	5.67	14.03	0.404134	17.8882	2.12998	0.0780312
0	1	50	29.9	0	137	76	154	209	35	46.3	6.00	31	25	22.7	19.6	3.1	79.0	105	379.0	5.93	2.96	6.60	1	0.87	4.74	0.628	4.08	12.66	0.322275	7.95048	1.23755	-0.555822
0	0	41	23.7	0	96	64	127	196	81	44.7	5.40	29	22	9.9	8.4	1.5	46.0	125	215.0	4.69	2.97	4.86	1	1.27	2.93	2.830	4.50	10.63	0.42333	30.0829	2.47001	-0.0960384
1	1	86	30.5	1	165	78	128	163	39	44.9	6.00	20	20	10.7	9.0	1.7	88.0	73	491.0	5.71	2.99	3.13	1	0.75	0.92	2.171	4.18	11.82	0.353638	25.6612	2.36498	-0.057623
0	1	34	27.4	0	120	76	174	286	27	48.7	5.10	16	21	15.8	13.2	2.6	100.0	89	398.0	4.03	2.99	4.45	1	0.93	2.58	1.709	4.71	15.01	0.313791	25.6521	2.55475	0.451381
1	1	46	27.4	1	143	91	149	141	49	47.9	6.10	32	26	13.1	10.9	2.2	87.0	97	431.0	6.09	3.01	4.16	1	0.80	2.95	2.489	5.12	12.93	0.395978	32.1828	2.65097	0.291717
1	1	39	27.5	0	128	88	141	315	56	50.3	5.80	23	23	14	12.1	1.9	64.0	123	487.0	5.19	3.01	5.48	1	1.13	3.44	0.771	4.41	11.45	0.385153	8.82795	1.27996	-0.794718
1	1	57	26.2	1	138	89	160	157	60	51.5	5.60	36	31	29.9	24.2	5.7	75.0	103	479.0	5.34	3.03	4.22	1	1.50	1.84	2.024	4.86	12.05	0.40332	24.3892	2.3258	-0.0612245
1	1	40	32.3	1	139	88	145	294	62	45.8	5.70	62	22	15.5	12.8	2.7	81.0	111	399.0	4.97	3.11	4.42	1	1.03	2.67	2.982	4.35	12.84	0.338785	38.2889	2.81957	0.356543
0	0	35	23.1	0	137	90	138	232	15	45	5.40	14	18	36.9	30.3	6.6	65.0	112	289.0	4.68	3.12	4.18	1	1.09	2.53	1.673	4.50	12.86	0.349922	21.5148	2.24429	-0.0228091
0	0	39	24.1	0	131	72	137	336	16	46.1	5.40	14	18	12.4	11.3	1.1	63.0	114	331.0	5.64	3.14	6.34	1	1.06	3.98	1.001	3.95	13.47	0.293244	13.4835	1.81271	-0.195678
1	1	48	23.8	0	130	76	161	204	44	46.3	5.40	11	16	25.2	21.1	4.1	87.0	96	339.0	5.18	3.16	4.48	1	1.02	2.75	1.192	4.73	13.67	0.346013	16.2946	2.01425	-0.0480192
1	0	58	28.5	0	114	68	115	173	18	47.9	7.10	35	29	16.2	13.8	2.4	61.0	101	290.0	8.76	3.17	3.44	1	0.97	1.61	2.914	3.90	10.11	0.385757	29.4605	2.42932	-0.108043
0	1	46	22.8	0	110	72	149	171	24	48.4	5.70	13	20	20.9	17.4	3.5	94.0	89	347.0	5.49	3.17	4.44	1	1.02	2.56	4.863	3.73	12.02	0.310316	58.4533	3.19835	0.265306
1	1	52	26.2	0	124	81	159	138	91	48.6	5.30	44	32	18.2	15.1	3.1	90.0	90	405.0	5.08	3.17	5.95	1	1.17	3.48	2.424	4.97	11.31	0.439434	27.4154	2.40661	-0.10084
1	1	46	21	0	119	80	156	252	28	44.9	5.50	20	21	21	17.9	3.1	64.0	118	442.0	4.93	3.18	4.48	1	0.98	2.88	2.815	4.72	14.28	0.330532	40.1982	2.95562	0.678271
1	0	47	23.7	0	99	67	158	117	219	47.9	5.60	61	49	17.1	13.4	3.7	68.0	97	319.0	5.50	3.19	5.08	1	1.07	2.61	1.460	4.73	14.55	0.325086	21.243	2.33541	0.254502
1	0	67	23.9	1	149	85	118	259	21	44.7	6.50	17	21	22.5	19.6	2.9	73.0	77	314.0	6.80	3.19	5.63	1	1.41	2.97	1.742	4.70	13.54	0.34712	23.5867	2.37616	0.208884
1	0	56	26	1	143	83	146	239	33	45.1	6.00	25	24	12.1	9.9	2.2	52.0	107	350.0	4.80	3.22	4.94	1	1.15	2.40	1.896	4.32	11.78	0.366723	22.3349	2.22416	-0.169268
0	1	39	24.9	0	115	66	146	163	30	47.1	5.60	13	17	15.6	13.4	2.2	94.0	93	261.0	5.11	3.25	4.90	1	0.80	3.47	2.111	4.29	12.60	0.340476	26.5986	2.44186	0.104442
1	1	52	25.1	0	131	81	151	225	21	49	5.80	23	20	16.6	14.1	2.5	71.0	108	324.0	4.93	3.30	5.31	1	0.91	3.04	0.979	4.79	12.77	0.375098	12.5018	1.69634	-0.394958
1	1	45	24.7	0	114	71	160	244	23	48.5	5.50	23	18	18.4	15.8	2.6	85.0	100	348.0	5.07	3.31	5.25	1	0.83	3.17	1.426	4.25	13.03	0.32617	18.5808	2.10741	-0.090036
1	1	41	24.3	0	111	65	150	139	35	48.7	5.70	26	22	13.9	11.8	2.1	87.0	100	448.0	5.11	3.33	5.85	1	1.01	4.20	2.862	3.78	10.11	0.373887	28.9348	2.41132	-0.115246
1	1	34	26.3	0	136	72	171	255	39	48.7	5.40	38	24	15.2	13.0	2.2	99.0	90	568.0	4.82	3.35	5.93	1	1.13	3.90	1.662	5.08	14.89	0.341169	24.7472	2.51073	0.40096
1	1	41	25.3	0	125	82	147	174	116	47.7	5.50	40	28	17.3	14.5	2.8	99.0	86	334.0	5.14	3.40	5.09	1	1.27	3.10	2.592	3.69	10.15	0.363547	26.3088	2.3176	-0.162065
1	1	36	24.5	1	141	91	176	233	36	49.6	5.70	25	21	26	23.8	2.2	76.0	118	369.0	5.04	3.41	7.10	1	0.97	4.81	0.758	5.19	14.89	0.348556	11.2866	1.72563	-0.0432173
0	1	29	24.6	0	92	52	139	294	30	47.6	5.60	19	23	9.8	8.4	1.4	73.0	126	388.0	4.82	3.45	4.38	1	0.77	2.81	2.366	4.68	13.32	0.351351	31.5151	2.65274	0.367347
1	1	43	28.1	0	114	80	150	205	59	48.9	5.60	39	29	13.3	10.9	2.4	81.0	108	426.0	5.48	3.46	4.65	1	1.02	2.54	1.368	4.74	14.71	0.32223	20.1233	2.29184	0.242497
1	1	23	25.2	0	126	71	166	218	21	51.7	5.40	19	19	17.3	14.0	3.3	89.0	111	415.0	4.80	3.50	3.97	1	0.79	2.27	0.909	4.86	12.32	0.394481	11.1989	1.56163	-0.543818
1	1	46	29	0	118	76	156	325	24	49.4	5.60	18	21	20.5	16.9	3.6	104.0	78	454.0	5.05	3.54	5.34	1	1.07	3.25	3.307	4.86	15.73	0.308964	52.0191	3.31173	0.890756
1	1	45	28.5	0	112	75	164	165	57	49.9	5.90	29	31	22.9	19.6	3.3	93.0	90	516.0	5.49	3.59	5.52	1	0.99	3.45	1.935	4.71	14.21	0.331457	27.4963	2.57135	0.442977
1	1	52	27.7	0	127	87	160	253	68	49.2	7.40	21	23	18.8	15.7	3.1	88.0	92	345.0	8.34	3.68	4.90	1	0.95	2.97	1.701	4.98	12.58	0.395866	21.3986	2.22323	-0.0672269
0	0	49	23.3	0	114	76	130	329	40	41.3	6.50	57	47	12.1	10.8	1.3	59.0	109	234.0	5.63	3.69	5.03	1	0.82	3.40	1.824	4.07	12.56	0.324045	22.9094	2.29035	-0.0192077
1	1	44	26	0	129	88	157	242	39	49.4	5.40	24	21	18.5	15.6	2.9	80.0	109	239.0	4.82	3.71	4.40	1	0.97	2.01	1.571	4.96	13.97	0.355047	21.9469	2.33068	0.226891
1	1	56	23.2	1	144	100	178	118	23.2	48.9	5.70	41	30	18.5	15.6	2.9	81.0	98	236.0	4.99	3.71	4.76	1	1.10	2.33	0.781	4.92	16.69	0.294787	13.0349	1.99762	0.0540216
1	0	61	24.3	0	127	81	117	151	14	46.9	6.10	12	16	14.4	12.4	2.0	56.0	102	327.0	6.22	3.73	4.23	1	0.96	1.50	3.711	3.99	12.73	0.313433	47.241	3.02349	0.398559
1	0	35	24.3	0	127	82	143	366	67	45.9	5.60	23	23	10.4	9.2	1.2	56.0	122	204.0	4.77	3.74	4.59	1	1.13	2.55	2.971	3.99	10.45	0.381818	31.0469	2.49442	-0.092437
1	0	41	21.4	0	118	77	129	252	28	48.5	5.20	24	25	12.9	11.1	1.8	64.0	109	289.0	4.86	3.75	5.45	1	1.13	2.94	2.122	4.47	11.16	0.400538	23.6815	2.25338	-0.204082
1	1	39	27.2	0	128	83	151	242	83	50.8	5.20	54	33	15.2	12.9	2.3	68.0	120	421.0	4.63	3.75	5.75	1	1.15	3.74	1.744	4.95	13.40	0.369403	23.3696	2.35848	0.17407
1	1	31	27.3	0	133	88	163.3	284.2	154	51.5	11.90	125	65	17.6	14.2	3.4	54.0	141	366.0	16.23	3.75	6.13	1	0.92	4.32	3.682	5.49	15.20	0.361184	55.9664	3.34786	0.894358
1	0	67	27	1	158	81	123	155	17	44	5.70	12	17	13	11.2	1.8	65.0	89	293.0	4.92	3.77	5.10	1	1.08	2.05	1.860	3.77	12.09	0.311828	22.4874	2.24668	-0.123649
1	1	27	23.4	0	126	82	147	264	34	49.1	10.90	23	22	13.8	11.9	1.9	77.0	125	307.0	14.15	3.87	5.92	1	0.93	3.57	2.692	5.47	14.47	0.378023	38.9532	2.9365	0.685474
1	1	43	29	1	144	98	162	238	67	50.9	5.60	26	24	17.1	15.1	2.0	85.0	102	522.0	5.83	3.87	6.27	1	1.47	3.71	1.576	4.65	13.26	0.350679	20.8978	2.23836	0.060024
1	1	51	28.2	1	141	97	162	209	67	45.2	6.00	48	32	16.8	14.2	2.6	79.0	105	324.0	5.77	3.88	5.62	1	0.98	3.56	1.302	4.21	11.54	0.364818	15.0251	1.81603	-0.505402
1	1	28	31	0	119	72	164	271	58	51.2	6.00	69	31	22.4	19.2	3.2	86.0	111	602.0	5.26	3.89	5.84	1	0.90	3.86	1.506	5.11	14.94	0.342035	22.4996	2.41889	0.338535
0	1	39	31.2	1	141	92	173	306	72	43	5.40	51	30	17.2	14.1	3.1	77.0	115	469.0	5.24	3.92	5.03	1	0.86	3.23	1.911	4.93	13.62	0.361968	26.0278	2.47952	0.304922
1	1	34	25.7	1	141	106	185	257	310	47.2	5.50	58	37	17.1	14.0	3.1	73.0	122	516.0	6.99	3.96	3.93	1	1.07	1.97	2.638	4.73	10.62	0.445386	28.0156	2.39841	-0.133253
1	1	50	32.5	1	109	72	161	199	74	52.1	5.80	47	30	11.3	9.8	1.5	89.0	92	467.0	5.43	4.02	6.40	1	0.96	4.43	2.437	5.16	12.35	0.417814	30.0969	2.55184	0.133253
0	0	58	20.9	1	140	86	140	125	11	50.2	5.60	12	22	10.1	8.7	1.4	78.0	76	239.0	4.78	4.03	4.60	1	0.95	1.94	4.386	4.15	12.27	0.338223	53.8162	3.12873	0.303721
1	1	34	27.4	0	117	75	148	331	55	46.9	5.50	40	26	37.5	33.0	4.5	71.0	123	428.0	5.00	4.06	5.35	1	1.06	3.44	1.908	4.23	11.77	0.359388	22.4572	2.22912	-0.165666
1	1	44	23.7	1	126	92	147	149	63	48.4	5.20	42	32	48.4	40.6	7.8	81.0	108	298.0	5.19	4.08	2.88	1	0.75	1.10	0.915	4.58	13.58	0.337261	12.4257	1.73768	-0.206483
1	1	48	25.3	0	106	70	155	285	49	45	6.50	33	24	8.4	7.7	0.7	84.0	100	429.0	6.99	4.09	6.00	1	0.93	3.87	0.950	4.45	13.01	0.342045	12.3595	1.69855	-0.35054
1	1	60	26.5	1	143	97	162	124	62	48.9	5.80	40	32	44	37.4	6.6	78.0	99	345.0	5.62	4.11	4.88	1	0.96	2.85	3.090	4.30	11.96	0.359532	36.9564	2.73679	0.151261
0	0	43	26.5	0	114	65	150	206	28	50.3	5.20	19	23	16.2	13.7	2.5	59.0	113	465.0	5.60	4.15	4.68	1	1.34	2.52	3.140	4.65	12.68	0.366719	39.8152	2.84968	0.333733
0	0	38	23.7	0	117	69	147	233	24	49	5.50	14	20	11.6	11.0	0.6	48.0	126	309.0	5.10	4.18	5.51	1	0.92	3.13	3.422	4.01	11.44	0.350524	39.1477	2.76891	0.0816327
1	1	42	25.8	1	111	75	168	179	37	48.8	5.40	25	20	19.7	16.9	2.8	81.0	109	407.0	4.93	4.20	4.41	1	0.97	2.51	1.355	4.77	14.03	0.339986	19.0106	2.19084	0.128451
1	1	35	31.4	0	108	64	157	419	85	47.1	5.90	62	41	20	16.9	3.1	83.0	111	445.0	5.30	4.23	5.67	1	0.79	3.88	2.723	5.16	12.97	0.397841	35.3173	2.7462	0.346939
1	1	39	32	1	151	107	157	195	185	51.5	6.50	150	55	20.7	16.6	4.1	71.0	119	405.0	7.95	4.24	5.50	1	1.12	3.51	1.984	4.96	11.82	0.419628	23.4509	2.27491	-0.110444
1	1	26	32.7	0	126	72	164	298	60	47.5	5.40	57	29	16	14.2	1.8	84.0	117	477.0	5.06	4.28	5.87	1	1.09	3.75	0.877	5.45	13.99	0.389564	12.2692	1.75041	-0.134454
1	1	46	27.7	0	137	91	170	276	100	47.8	7.20	76	47	23.7	19.2	4.5	72.0	112	421.0	7.18	4.28	6.34	1	1.04	4.12	1.589	4.87	13.18	0.369499	20.943	2.23581	0.032413
1	1	35	25.4	1	131	81	160	253	29	49.4	5.60	32	27	15.3	13.1	2.2	86.0	107	414.0	5.60	4.39	4.34	1	0.79	2.40	2.379	4.57	13.81	0.33092	32.854	2.72413	0.481393
1	1	61	26.1	1	177	94	151	202	46	50	11.10	16	16	14.1	11.7	2.4	85.0	90	229.0	14.83	4.46	6.07	1	1.09	3.29	1.502	3.89	14.24	0.273174	21.3885	2.32208	0.234094
1	1	29	26.2	0	128	72	167.6	180	49	44.8	5.20	34	24	9.4	8.6	0.8	76.0	124	449.0	4.37	4.49	3.17	1	0.74	1.76	1.164	4.66	11.78	0.395586	13.7119	1.73627	-0.535414
0	0	44	25.6	0	98	66	132	235	15	43.1	5.40	12	16	14.6	12.9	1.7	55.0	115	347.0	4.84	4.53	4.82	1	0.93	1.86	1.904	4.98	11.29	0.441098	21.4962	2.16246	-0.262905
0	0	51	23	0	119	87	135	323	41	47.8	6.00	36	23	14.5	12.8	1.7	58.0	107	348.0	6.07	4.54	6.47	1	1.09	4.07	1.051	4.17	11.09	0.376014	11.6556	1.54135	-0.731092
1	1	60	24.4	1	152	80	176	226	58	49.4	6.50	29	21	16.4	14.4	2.0	83.0	93	334.0	8.10	4.54	7.32	1	1.10	5.15	1.337	5.11	12.88	0.396739	17.2206	2.02279	-0.172869
0	1	46	25.4	0	121	89	155	306	21	49.5	5.80	27	32	19.3	16.3	3.0	103.0	79	469.0	4.88	4.55	4.87	1	1.09	2.33	1.034	4.69	13.32	0.352102	13.7729	1.82497	-0.218487
1	0	57	28.9	0	105	72	120	275	20	45.4	5.60	17	21	8.7	7.8	0.9	59.0	103	291.0	6.30	4.76	4.28	1	0.73	1.52	1.379	4.26	12.83	0.332034	17.6926	2.04699	-0.165666
1	0	60	24.8	1	149	91	133	188	9	48.6	5.40	16	21	19.7	17.6	2.1	58.0	101	378.0	5.53	4.76	8.57	1	1.24	3.12	2.279	3.76	12.96	0.290123	29.5358	2.56686	0.237695
0	1	58	21.9	0	114	70	135	272	15	44.6	5.50	17	24	6.3	5.3	1.0	81.0	98	367.0	4.45	5.06	5.20	1	0.91	2.34	1.341	4.60	14.63	0.314422	19.6188	2.26115	0.216086
0	0	51	23.1	0	114	73	123	276	16	45.6	6.50	13	21	9.6	8.7	0.9	67.0	96	254.0	5.58	5.19	5.22	1	1.05	2.50	1.496	3.74	12.96	0.28858	19.3882	2.14591	-0.0840336
1	1	58	26.5	0	124	86	157	189	82	47.4	5.90	13	36	26.2	22.8	3.4	79.0	99	433.0	6.15	5.31	5.97	1	1.17	3.03	2.035	4.41	13.83	0.318872	28.1441	2.57063	0.403361
1	1	37	29.1	1	137	93	138	241	35	45.3	5.60	24	18	12.6	10.4	2.2	84.0	108	449.0	5.97	5.48	4.22	1	0.84	2.33	0.650	3.64	13.27	0.274303	8.6255	1.35403	-0.381753
1	1	45	25.3	0	106	62	166	170	63	45.9	5.40	23	19	14.7	13.0	1.7	92.0	92	416.0	4.96	5.49	6.52	1	1.01	2.31	1.288	4.97	12.22	0.40671	15.7394	1.89668	-0.372149
1	1	39	27.9	0	137	84	162	241	44	43.3	5.20	45	30	12.9	10.9	2.0	70.0	119	512.0	5.17	5.59	4.55	1	0.85	2.31	1.192	5.39	12.44	0.43328	14.8285	1.84881	-0.372149
1	0	45	23	0	114	71	134	195	12	45.3	5.80	16	21	8.9	7.4	1.5	64.0	106	182.0	5.78	5.69	3.41	1	0.75	1.01	2.284	4.12	11.30	0.364602	25.8092	2.34578	-0.141657
1	1	43	29.2	1	146	97	146	169	81	49.4	5.60	110	61	15.1	12.9	2.2	99.0	85	580.0	5.53	5.70	5.00	1	0.93	2.52	1.350	4.61	11.89	0.387721	16.0515	1.89931	-0.404562
1	1	43	29.7	0	136	84	161	194	128	48	5.60	84	58	11.1	8.0	3.1	91.0	94	457.0	5.00	6.38	6.34	1	0.91	3.62	3.501	5.03	14.25	0.352982	49.8892	3.16967	0.753902
0	0	35	20.8	0	116	73	97	260	32	46.2	5.40	17	17	10.5	10.1	0.4	51.0	126	230.0	4.79	6.45	4.13	1	0.79	1.28	2.803	4.47	13.33	0.335334	37.364	2.82358	0.470588
1	1	40	36.4	0	114	78	183	175	164	50.4	5.60	40	39	15.5	13.3	2.2	82.0	109	405.0	4.54	6.85	4.86	1	0.89	2.08	0.617	5.68	13.02	0.436252	8.03334	1.2683	-0.468187
1	1	29	28.2	0	126	78	165	208	36	46.8	7.70	37	21	11.7	10.8	0.9	70.0	128	275.0	9.66	6.93	6.07	1	0.77	3.17	1.245	5.52	12.66	0.436019	15.7617	1.92191	-0.292917
1	1	44	27.4	0	139	82	158	136	137	45.7	5.40	31	37	17	14.0	3.0	83.0	104	672.0	5.94	7.17	6.04	1	1.28	2.38	1.832	3.99	10.81	0.369103	19.8039	2.05935	-0.363745
1	1	43	30.6	0	118	80	151.1	125.4	41	46.5	5.60	18	21	17.8	15.6	2.2	107.0	77	456.0	4.94	8.23	4.79	1	0.65	1.32	1.312	4.26	13.53	0.314856	17.7514	2.09134	-0.0060024
0	0	57	22.4	0	139	77	135	168	18	48.2	5.70	31	32	11.6	10.2	1.4	79.0	75	252.0	6.25	8.78	6.55	1	0.96	2.02	2.301	4.34	12.34	0.351702	28.3943	2.49307	0.090036
1	1	50	30.8	0	123	85	156	320	170	48.1	6.50	36	26	19.8	17.5	2.3	81.0	103	603.0	7.51	9.21	6.24	1	0.89	3.02	2.499	4.44	10.76	0.412639	26.8892	2.36311	-0.147659
1	1	37	23.6	0	109	74	147	143	170	48.9	5.30	50	34	14	12.4	1.6	62.0	128	417.0	5.69	9.34	4.84	1	0.77	1.46	2.442	4.86	10.98	0.442623	26.8132	2.36963	-0.140456
1	1	40	29	0	128	81	149	184	48	50.5	5.40	16	22	22.1	19.8	2.3	77.0	114	551.0	5.70	9.50	5.08	1	0.65	1.82	1.524	4.46	12.22	0.364975	18.6233	2.06493	-0.256903
1	1	30	24.8	0	125	73	154	266	30	49.5	5.40	9	22	8.9	8.1	0.8	79.0	121	389.0	4.95	9.66	6.49	1	0.72	2.40	2.506	4.96	14.83	0.334457	37.164	2.91332	0.696279
